# Supplementary material
Source: PubMed Central journal article supplement (PMC3207357)
Supplement: NIHMS322841-supplement-2.pdf [file NIHMS322841-supplement-2.pdf]

**Supplemental Information for:  
Lindblad-Toh et al: “A high-resolution map of evolutionary constraint in the  
human genome based on 29 eutherian mammals.”**

**Contents**

|                                                    |    |
|----------------------------------------------------|----|
| Supplementary Notes.....                           | 2  |
| S1 Samples and sequencing.....                     | 2  |
| S2 Assembly.....                                   | 2  |
| S3 Error estimation and correction.....            | 3  |
| S4 Alignments details.....                         | 4  |
| S5 Estimating constraint.....                      | 5  |
| S6 Detection of constrained elements.....          | 6  |
| S7 Constraint vs. polymorphism.....                | 7  |
| S8 Protein coding genes.....                       | 8  |
| S9 Readthrough and SCEs.....                       | 9  |
| S10 RNA structures.....                            | 9  |
| S11 Patterns of promoter constraint.....           | 14 |
| S12 Regulatory motif discovery.....                | 15 |
| S13 Chromatin state information.....               | 16 |
| S14 Overall accounting of constraint elements..... | 17 |
| S15 Disease associated variants.....               | 17 |
| S16 Codon specific positive selection.....         | 17 |
| S17 Exaptation of ancestral repeat elements.....   | 21 |
| S18 Human and primate accelerated regions.....     | 22 |
| Supplementary Data Sets.....                       | 26 |
| Supplementary Reference.....                       | 33 |
| Supplementary Tables 1-15.....                     | 37 |
| Supplementary Figures 1-24.....                    | 90 |

## Supplementary Notes

This supplementary information follows the structure and layout of the main paper. Here we describe the methodology in detail and include additional analysis not covered in depth in the main text.

## Supplementary Section S1: Samples and sequencing

### Supplementary Methods 1.1 - Sequencing strategy:

Our goal was to identify constrained elements in the human genome based on evolutionary constraint across eutherian mammals. To obtain the maximum power at a reasonable cost we developed a strategy of sequencing genomes to 2x coverage instead of the standard 8x<sup>1</sup>. At 2x, theoretically ~85% of the sequence should be recovered, although in smaller pieces.

### Supplementary Methods 1.2 - Species selection and preparation:

Species were selected to generate the maximum novel branch length, while spanning all the four major clades. When appropriate the relevance of the species as a model organism was taken into account. For non-endangered species, 8 females were selected and heterozygosity tested across 200 loci. The individual with the lowest level of polymorphism was selected for sequencing. All individuals sequenced are female. Most species had heterozygosity rates of 1/500-1/1000 bp, while the elephant, guinea pig and rabbit had extremely low heterozygosity. DNA was prepared from blood or available tissues using standard protocols for high molecular weight DNA. To determine the amount of sequence required for 2x coverage of each genome, ~50,000 Fosmid pairs were generated and an estimation of the euchromatic genome size was performed by placing these Fosmid pairs on the canine genome and estimating the relative genome size.

### Supplementary Methods 1.3 - Sequencing coverage:

Eight of the nine high coverage draft or finished genomes were previously described (Table S1). Guinea pig was sequenced with a standard mix of paired end reads (4kb and 10kb plasmids, 40-kb Fosmid and BAC ends<sup>2</sup>) totaling 6.8x coverage of the genome and assembled using ARACHNE<sup>3</sup>.

For each of the organisms sequenced to low coverage, ~2x coverage of sequence typically was generated from 4kb paired end reads (~1.8x) and 40kb Fosmids (~0.2x) using ABI3730 sequencers. Species and sample source information is described in Table S1.

## Supplementary Section S2: Assembly

### Supplementary Methods 2.1 - Genome assembly strategy:

All 2x genomes were assembled using an assisted assembly method<sup>4</sup> where the *de novo* assembly is improved by placing all reads on related genomes (in this case on dog, CanFam2.0 and human, hg18) and leveraging the placement information to support and extend information in the *de novo* assembly.

Importantly, no novel information was introduced in the assemblies based on the alignment to the related genomes. Instead, read-read alignments confirmed by read placement on related genomes

were used to extend existing contigs; and confirmed single links were allowed to join different scaffolds, hence improving contiguity. Moreover, read pairs aligning onto the reference uniquely and consistently were used to detect and eventually fix misassemblies introduced in an earlier stage due to the presence of weak joins. All assembly statistics are described in Table S1 and assemblies are available at <http://www.broadinstitute.org/ftp/pub/assemblies/mammals/>.

### **Supplementary Text 2.2 – 2x sequencing versus next generation sequencing:**

The 2x genomes utilized here were produced over a time span of several years, but to achieve consistency in the data set we utilized the same sequencing and assembly strategy throughout. The current availability of next generation sequencing technologies will reduce the cost of genome sequencing by an order of magnitude and allow sequencing to high coverage of many mammals. For comparative genome analysis understanding the quality of the assemblies, alignments and error modes in the data are important and so while future mammalian analysis will be less expensive and time consuming, they should still be performed in a consistent manner.

## **Supplementary Section S3: Error estimation and error correction**

A detailed analysis of sequencing errors in the 2x genomes, including both miscalled bases and erroneous indels, has been published as a satellite paper<sup>5</sup>, with key results summarized briefly below.

### **Supplementary Text 3.1 - Quality score distribution for assembly:**

Even with only 2x average genomic coverage, these assemblies predominantly consist of high-quality bases. Roughly 82% of bases, across all of the assemblies, have quality scores >45, and only ~4% have scores <20.

### **Supplementary Text 3.2 - Comparison with ENCODE assemblies to estimate error rates:**

The mismatch rates for aligned 2x and ENCODE bases ranged from 2.6 (elephant) to 25.1 (hedgehog) mismatches per kb, while the indel rates showed somewhat less variation. These rates generally decreased with increasing quality scores, as expected, but the limiting rates—at the highest quality scores—differed considerably among species.

At the highest quality scores, mismatch rates were highest for hedgehog, for which separate species were sequenced in the ENCODE and 2X project, and microbat, known to show elevated levels of intraspecific genetic variation<sup>5</sup>. The smallest mismatch rates occurred with the African savannah elephant, which has been reported to have low average genetic diversity<sup>5</sup>.

We thus used observed difference rates at the highest quality bases (quality score >45) as rough estimates of polymorphism rates, and subtracted these estimates from the overall observed rates to obtain approximate polymorphism-corrected error rates. After this adjustment, the estimated base-call error rates were much more concordant across species, at 0.72–3.43 per kb.

The 2x species with slightly higher coverage, such as megabat (2.6x) and rock hyrax (2.2x), have the lowest residual error rates, as expected.

**Supplementary Text 3.3 - Generation of error-corrected assemblies and alignments:**

Given the localized nature of sequencing errors, with a large majority of errors coming from a small minority of bases, we developed automatic methods to generate a version of the alignments that mitigate the effects of errors for downstream analyses. These are available from <http://compgen.bscb.cornell.edu/projects/32way-masked/>

**Supplementary Section S4: Alignment details****Supplementary Text S4.1 - Alignment choice in the detection of constraint:**

Although we have used MultiZ alignments for the main bulk of this work, we also evaluated the use of Enredo and Pecan<sup>6</sup> to build an alternative set of alignments, for the specific purpose of evaluating segmental duplications, since MultiZ was not designed to handle them. In short, Enredo is a graph-based method that defines sets of co-linear genomic sequences and Pecan, a consistency-based multiple aligner, aligns them. On the one hand MultiZ provides a higher coverage of the genome. On the other hand Pecan works in a global fashion and, together with Enredo, can provide alignments on segmental duplications.

We compared the sets of phastCons constrained elements we obtain from both sets of alignments. We restricted the comparison to the regions covered by the Pecan alignments. Globally, we found approximately the same amount of genome under constraint: 4.34% on the MultiZ alignments vs. 4.01% on the Pecan alignments. When comparing the constrained regions at the base pair level, we found that 83.48% of the bases called by phastCons on the Pecan alignments are also detected as constrained when looking at the MultiZ alignments. The majority of the conflicting elements are shorter than 20 nucleotides. For instance, 93% of the MultiZ-phastCons elements of at least 30bp overlap with a Pecan-phastCons element (Fig S2).

We next focused on the human segmental duplications as defined by Enredo where Pecan and MultiZ alignments are likely to be more different. In these regions, Pecan assigned all the human copies of the genomic segmental duplication to the same alignment. We observed a drop in the amount of nucleotides under constraint in the MultiZ alignments (from 4.34% to 2.71%) while we see an increase in constraint in the Pecan alignments (from 4.01% to 4.94%). Again, both sets of elements tend to disagree more on smaller elements, but this time a third of the elements longer than 50 nucleotides are found in the Pecan-phastCons set only (Fig S2). PhastCons can over-predict constrained regions on Pecan alignments where long insertions have happened. We remove these from the final set by ensuring that all constrained elements have no more than 10% gaps in the human sequence and at least 80% informative nucleotides (non gaps or Ns) in at least one other sequence.

In segmental duplications, we note a reduction in the amount of detectable constrained elements. In some examples, we see how Pecan-phastCons elements can detect coding exons missed in the MultiZ-phastCons set, although we note that phastCons is not designed to study segmental duplications. Importantly, the constrained elements detected on both sets of alignments are comparable for the non-duplicated portion of the genome. For the remaining analysis in this paper we use the MultiZ alignments.

## Supplementary Section S5: Estimating constraint

### Supplementary Methods S5.1 - Neutral tree estimation:

For each chromosome we extracted 4-fold third codon positions from all Ensembl genes annotated as protein that had a single homolog in both mouse and dog. We used PAML (version 4, June 2007)<sup>7</sup> with default parameters to estimate branch lengths fixing the tree topology. The estimated nucleotide substitution rate matrix and tree branch lengths were used as the neutral model for constraint estimation.

### Supplementary methods S5.2 - Supplementary methods - Estimates of selection - Siphy- $\omega$ , Siphy- $\pi$ :

We used Siphy<sup>8</sup> for constraint estimation, at a resolution of 12bp and 50bp as previously described. Constraint was estimated in the full 29way-alignment, an alignment containing only a subset of species Human-Mouse-Rat-Dog (HMRD), and an alignment containing high coverage genomes for the ENCODE regions. Constraint was estimated using both a rate based method (Siphy- $\omega$ ) and a biased substitution based method (Siphy- $\pi$ ).

### Supplementary Text S5.3 - Challenges of varying branch length:

As a measure of constraint for the Siphy- $\pi$  method, the log-odds scores were used. For a given strength of constraint, elements with log-odds scores are proportional to alignment depth, and as a result, elements with higher branch length will receive higher score. Since Ancestral Repeats tend to have lower branch length, this may lead to an over-estimation of the excess under constraint. To conservatively estimate constraint purely based on differences in substitution patterns, we have employed a branch length correction. Briefly, genomic windows were divided to bins based on their average branch length. In each bin, the mean ( $\mu$ ) and standard deviation ( $s$ ) of the log-odds scores were computed for the Ancestral Repeats background sets. All scores in a bin were standardized by subtracting the mean and then dividing by the standard deviation to produce a Z-score. All Z-scores from all bins were then collected to produce one genomic distribution and one Ancestral Repeat distribution. Constraint was called based on these distributions as described in the previous section. The correction we have employed eliminates the bias towards windows with higher branch length.

### Supplementary Methods S5.4 - Comparison with Encode:

In its most recent data freeze (January 2009) the ENCODE dataset includes a multiple alignment of a superset of the species used in this paper. This alignment consist of assemblies sequenced at “comparative analysis grade” offer us the possibility to benchmark the impact of low coverage data on our predictions.

The usage of 2x mammals presents potential challenges and biases in comparing the background set to the entire genome, due to problematic alignability issues and varying branch lengths. To assess the impact of the incomplete data resulting from low coverage

assemblies we compared predictions in the ENCODE regions using both alignments: The ENCODE alignment composed of high coverage assemblies and the genome wide alignment composed of low coverage assemblies restricted to the ENCODE regions. The ENCODE alignments are missing 6 species from our sets, and these species were excluded for the purpose of this comparison, resulting in the comparison of 23 species.

#### **Supplementary Text 5.5 - Notes for Table S2 - Constraint Estimation and Detection statistics:**

We used three different methods for detection and estimation of constrained elements (blue, red, green). The first (SiPhy- $\omega$ ) is looking for a reduction in the neutral divergence rate estimate  $\omega$ , and setting a cutoff on the value of  $\omega$ . The second (Siphy- $\omega$  lods) is looking at  $\omega$ , but setting a cutoff on the log odds probability that  $\omega$  is less than 1. The third (Siphy- $\pi$ ) is looking at the log odds probability that the stationary distribution of the mutation matrix is different from uniform. We applied all three methods to 12-mers across the 29-way alignment using ancestral repeats as the background (top row), to 12-mers across the 29-way alignments using ancestral repeats that are conserved over species covering the same branch length as the elements, thus correcting for the varying branch lengths across the genome, but possibly being too stringent because some of the conservation of ancestral repeats is due to selection (second row), to 12-mers across the four mammals human, mouse, rat, dog (third row), and to 50-mers across the four mammals (last row).

## **Supplementary Section S6: Detection of constrained elements**

#### **Supplementary Text 6.1 - Detecting constraint elements:**

We used a window-based approach to call constrained elements.

First, we divided the genome into (overlapping) kmers. Each kmer was scored using SiPhy to get  $S(i)$  the score of k-mer  $i$ . Since neutral evolutionary rate differ between different chromosomes, subsequent analysis was done separately for each chromosome. For each chromosome we constructed two histograms, a genomic histogram comprising all scores of k-mers for this chromosome, and a background histogram, comprising scores of all k-mers overlapping Ancestral Repeats for this chromosome. The two histograms were then used to compute an empirical FDR cutoff  $\omega_c$  at level 10%, defined as the maximum value such that the ratio of areas to the right of this value is no more than 10%. Windows with  $S(i) > \omega_c$  were declared as significant k-mers. Finally, we clustered overlapping significant k-mers to yield larger elements. The above procedure was repeated for two different window sizes (12bp and 50bp), different conservation scores (SiPhy- $\omega$ , SiPhy- $\pi$ ) and different alignments (29way, HMRD and ENCODE comparative grade).

The different alignments gave vastly different significance cutoffs. For example, when calling elements at a 10% FDR level and using the full 29way alignments at a 12bp resolution, the average constraint cutoff across all chromosomes was  $\omega \sim 0.29$  - hence a roughly 3.4-fold reduction in average substitution rate was sufficient to declare an individual 12-mer as constrained. Using the HMRD alignment, a much stricter cutoff of essentially  $\omega=0$  (no observed substitutions in the alignment) was required to declare a 12-mer as constrained at the same 10% FDR level.

**Supplementary Text S6.2 - Comparison of SiPhy- $\omega$ , SiPhy- $\pi$  and PhastCons elements:**

We set out to examine the robustness of the set of elements called based on the method used. We have used both SiPhy versions, as well as elements called using phastCons. Overall, there was a strong agreement between the different methods. PhastCons elements overlap 93% of SiPhy- $\omega$  (5% FDR) bases, whereas phastCons overlap only 75% of SiPhy- $\omega$  (10% FDR) bases. This suggests that the core data set is similar but that 10% FDR of SiPhy- $\omega$  elements allows the inclusion of additional bases not found in the phastCons elements. This is supported by the fact that when these three data sets are compared, the SiPhy- $\omega$  5% FDR contains 1,674 elements unique to this data set, whereas phastCons has 285,039 unique elements and SiPhy- $\omega$  5% FDR has 1,449,816. While some of these elements may be false positive due to the higher FDR, this dataset should contain many novel elements.

**Supplementary Text S6.3: Correlation between 29 mammals and previously defined constrained elements:**

For each Megabase in the genome we computed HMRD 50mer based element and 29-way eutherian 12mer based (SiPhy- $\omega$  10% FDR) element density, and found a very strong correlation between the two, suggesting that newly discovered elements have a similar genome-wide distribution as previously discovered elements (Figure S6).

In addition, we compared the elements detected for 29 mammals with both SiPhy  $\omega$  and  $\pi$  at 5% and 10% FDR and PhastCons elements and compared the overlap for both elements and bases with the HMRD 50 bp set, the Siepel five vertebrate data set and the union of these elements. While the union of the Siepel and HMRD elements cover a larger fraction on the genome, the overlap with the 29 mammals elements is only marginally bigger (see Supplemental Table S3 and Figure S4).

**Supplementary Text S6.4: Identification of newly-detected elements:** Within intronic and intergenic elements, the majority of constraint sequence was not previously detected as constraint with HMRD. Taking the lack of granularity of the 50mer HMRD analysis into account, we identify 55.3% of elements as potentially part of elements previously detected by HMRD (overlapping or falling within 50 bp of a previously detected constraint element). An additional 19.4% of elements fall 50 to 500 bp from previously identified elements suggesting they could be part of the same regulatory unit. The remaining 25.3% of elements (~916,000 elements), fall >500 bp from previously identified constraint elements, suggesting that they may be novel entities.

To examine the clustering of elements on a larger scale we examined the element numbers in 10kb windows of the genome. Under Poisson distribution the 95 percentile for the number of elements contained in a 10K window is 18. Since there are 300K such windows in the genome, we expect about 15K windows having 18 or more elements. We observe ~5x this number which indicates that elements do indeed tend to cluster

**Supplementary Section S7: Constraint vs. polymorphism****Supplementary Methods S7.1 - SNP analysis methods:**



For all analysis we have used an unbiased SNP set from Keinan et al.<sup>9</sup>. To allow the maximal divergence between human populations we have used the Yoruban (YRI) SNP set. Each position in the 29way-alignment was collapsed to the IUPAC code symbol closest to the Siphy- $\pi$  vector for this position. A total of 92,906 SNPs for which Siphy- $\pi$  indicated a two-fold degenerate site were used for comparison with the human SNPs.

### **Supplementary Methods S7.2 - SNP density vs. constraint:**

We computed the average SNP density in both masked genomic regions, and in constrained elements and performed a correlation.

### **Supplementary Methods S7.3 - Shifted allelic spectrum for two-fold mutating sites:**

We counted the joint frequency of all di-nucleotide patterns in the mammalian phylogeny for the ancestral and derived allele in the human YRI populations.

The value  $C(ij,kl)$  represent the counts in which the two mammalian alleles are  $i$  and  $j$ , the human ancestral allele is  $k$  and the derived allele is  $l$ .

We computed an enrichment matrix  $E(ij,kl)$  given by:

$$E(ij,kl) = C(ij,kl) / C(ij)*C(kl)$$

where  $C(ij)$  is the marginal frequency of the di-nucleotide pattern  $(ij)$  in the mammalian phylogeny, and  $C(kl)$  is the marginal frequency in the human ancestral and derived alleles. This enrichment matrix measures the tendency of the non-human allele and the derived allele to coincide, with  $E(ij,kl) = 1$  representing no enrichment beyond background.

## **Supplementary Section S8: Protein-coding genes**

### **Supplementary Methods S8.1 - Exon prediction:**

To predict novel conserved exons, we applied an enhanced version of CONGO, an algorithm we previously developed for the same purpose in *Drosophila* genomes<sup>10</sup>. Briefly, CONGO incorporates discriminative metrics of protein-coding evolutionary signatures -- including reading frame conservation and codon substitution frequencies<sup>11</sup> -- within the framework of a semi-Markov conditional random field (SMCRF), a type of probabilistic graphical model that can combine such metrics in order to produce a segmentation of the genome into predicted exons and non-coding regions. The enhancements to the previous version are mainly adaptations to the mammalian exon prediction task, including a semi-Markov feature to model the short length distribution of mammalian exons, a synteny feature helpful for recognizing duplicated and pseudogenic regions, and an alternative training objective function similar to Conrad's<sup>12</sup>, which improves the accuracy of the algorithm given the unbalanced prediction task (only ~1.5% of the human genome being protein-coding).

We applied CONGO to the MULTIZ alignments of 29 eutherian genomes, which we also postprocessed to mask likely sequencing errors<sup>5</sup>. We trained CONGO's SMCRF using the GENCODE



annotations of the ENCODE ‘random’ regions<sup>13</sup>, approximately 0.5% of the human genome. We then applied the trained model to decode each human chromosome assembly. From the ~175,000 resulting exon predictions, we subtracted those overlapping any annotated coding exon from the major human gene catalogs (including RefSeq, Ensembl, GENCODE and UCSC Genes downloaded on March 27, 2010 – see supplementary data), leaving the 3,788 predictions reported in the main text.

### **Supplementary Methods S8.2 – Transcript models**

We next used Scripture<sup>14</sup> to reconstruct transcript models based on high-throughput transcriptome sequencing in 16 human tissues by Illumina, Inc (BodyMap2). We used the resulting transcript models to assess expression evidence and tissue specificity for the predicted exons, and also to ‘link’ them with known gene structures annotated by GENCODE, as described in the main text. We also collected several other lines of evidence not used by CONGO to provide initial support for the exon predictions, including existing EST/cDNA expression evidence, similarity to Pfam protein domains identified using HMMER<sup>15</sup>, and coding gene-associated chromatin states<sup>16-17</sup>.

## **Supplementary Section S9: Readthrough and synonymous constraint elements**

We searched for potential examples of stop codon readthrough in mammals by searching for continued protein-coding evolutionary signatures in the regions immediately downstream of the stop codon in known human coding transcripts. This follows our previous approach in 12 *Drosophila* genomes<sup>10</sup>. In addition to known selenoprotein-encoding genes, we found four novel candidates (*OPRK1*, *OPRL1*, *BRI3BP*, and *SACM1L*) with no apparent alternative explanations other than translational readthrough (such as splicing or RNA editing). Further analysis of these mammalian examples, and many others in animal species, are reported in a separate manuscript (Jungreis et al., “Evidence of widespread stop codon readthrough in *Drosophila* and other metazoa”, in revision).

To identify protein-coding regions under selection for additional, overlapping functions, we developed a method based on phylogenetic codon models to measure synonymous substitution rates in short windows and report the statistical significance of their reduction. We applied this method to all human CCDS ORFs and identified more than 10,000 “Synonymous Constraint Elements” (SCEs) with resolution for nine-codon windows, covering about 2% of all synonymous sites (FDR < 0.01). A typical example shows a 77% reduced synonymous rate compared to genome-wide averages across placental mammals. The SCEs show strong positional enrichments for exon and ORF boundaries, suggesting widespread constraints on splicing and translational regulatory elements embedded within mammalian ORFs. Many SCEs can also be associated with other overlapping functions such as miRNA targeting, dual-coding regions, A-to-I editing, and RNA secondary structures, but further study will be needed in order to associate most with biological functions. Full details of this work are reported in a companion papers<sup>18-19</sup>.

## **Supplementary Section S10: RNA structures**

### **Supplementary Text 10.1 - EvoFold screen**

The EvoFold RNA structure screen was based on a 41 species subset of the genome-wide 44-way multiZ alignment, which includes additional vertebrate genomes and is available from the UCSC

Genome Browser. We used a 31-way subset for the structure prediction and profile-model training, consisting of 28 of the 29 eutherian mammals, together with opossum, chicken, and tetraodon as outgroups. An additional 10 species that were not used for structure inference, consisting of primarily non-mammalian vertebrates and a single eutherian mammal, were used as an independent test set for structure validation.

The screen was restricted to a set of conserved alignment segments based on the PhastCons predicted elements<sup>20</sup>, which span 5.56% of the genome. Since EvoFold is sensitive to misaligned sequences, we applied a conservative sequence filter to the extracted alignment segments, which discards sequences with a surprising number of mismatches given the branch-lengths of the relating phylogenetic tree (see Alignment Filtering below). EvoFold (v.2.0)<sup>21</sup> was then applied to these filtered alignments in both their forward and reverse directions. Low-confidence predictions that are short (< 6 base-pairs); harbor excessive amount of bulges; based on shallow or low quality alignments; or overlap repeats or pseudogenes were eliminated from the prediction set. See supplement of<sup>22</sup> for details on the screen.

The UCSC Genes set (as of May 25, 2009) was used to define genomic regions. Each prediction was assigned to the genomic region it had the greatest overlap with. Protein-coding regions were excluded from the study to focus it on non-coding regions.

### **Supplementary Text 10.2 - EvoFam clustering pipeline**

We clustered the EvoFold predictions into candidate families using a novel approach (EvoFam), as described below. A probabilistic model based on a profile stochastic context free grammar (pSCFG), a.k.a. a covariance model, was built from each EvoFold prediction, using the Infernal RNA tools v 1.0 (cmbuild utility)<sup>23</sup>. An all-against-all similarity (homology) comparison between structural RNA predictions was performed, based on a probabilistic similarity measure between pairs of pSCFG models. This new similarity measure is based on a form of Kullback-Leibler divergence, modified to correct for varying false positive rates due to varying model size and complexity (see<sup>22</sup>).

A similarity graph was defined with vertices corresponding to the pSCFG models of RNA structures and with edges connecting pairs of models with a dissimilarity below a threshold selected to control false discovery rate (FDR). Families were defined as highly connected subgraphs, where a highly connected subgraph (HCS) is defined as a subgraph  $S$  of  $n$  vertices with edge connectivity  $k(S) > n/2$ , with edge connectivity  $k(S)$  defined as the minimum number of edges whose removal disconnects  $S$ . These families were computed using the iterated HCS algorithm of<sup>24</sup>.

Additional paralogous matches to the UTR EvoFold predictions were detected by searching the conserved UTR regions of the human genome with the corresponding pSCFG (using cmsearch with global search option). The paralogous hits were filtered by requiring E-value < 0.1 (relative to a 1 Megabase database) and strong double substitution evidence (p-value < 0.2; Monte Carlo test applied to all species excluding human). Repeat regions and known pseudogene matches were removed. For the analysis limited to UTR regions, this set of putative paralogs was then combined with the original EvoFold set and analyzed by the subsequent family identification stages.

### **Supplementary Text 10.3 - Filtered candidate families**

After initial definition of the candidate families through cluster analysis, we further evaluated the statistical significance and biological evidence for the candidate sets. The disjunction of a series of enrichment tests was used to produce the final high confidence filtered sets:

(i) We evaluated the statistical significance of the compensatory substitutions supporting each member of a family using a Monte Carlo test on the 31-way alignment and, importantly, on the independent set of ten held-out species not used for structure inference. The test, called EvoP, measures how surprising it is to achieve the observed number of double substitutions, given the total number of substitutions and a random substitution process on the branches of the tree relating the aligned species (see S10.5 – EvoP double substitution significance test). Considering each member as an independent test for the overall significance of a family, the p-values of all family members were combined multiplicatively using the Fisher method and used as an overall measure of evidence as well as for ranking.

(ii) For predictions within known protein-coding genes (i.e. UTR and intronic genomic regions), gene ontology (GO) enrichment statistics were computed for each cluster with three or more members, using the topGO library<sup>25</sup>. We additionally required that an enriched GO term had evidential support in two or more family members to prevent a single unusual gene flagging the entire family. The GO analysis was conducted against a background set of the original EvoFold structure predictions, and so estimated the additional enrichment of families beyond the possible enrichments or biases of the original EvoFold set. Families were filtered based on the most significant p-value in each ontology.

(iii) The degree of enrichment of family members for a particular genomic region (5'UTR, 3'UTR, intron, intergenic) was computed by chi-squared statistic relative to the background proportions of the entire EvoFold prediction set.

(iv) We calculated the mean structure length in terms of pairing bases for each family: longer structures have a lower prior probability and thus higher confidence.

(v) Enrichment relative to an immunity-related gene set consisting of the human homologues of mouse macrophage-related genes as defined in<sup>26</sup> was estimated by Fisher's exact test.

We defined a final set of high-confidence predictions as the disjunction of the families deemed biologically significant via any of these significance estimates: those for which any of the following measures had p-value smaller than a defined threshold (0.05 for double substitution p-values; < 0.005 for region enrichment; < 0.01 for maximal GO enrichment p-values); or mean base-pair length > 11. Combining these statistical measures of confidence, the original full set of candidate families was filtered to a smaller set of high-confidence families.

#### **Supplementary Text 10.4 - Alignment filtering**

Since both the EvoFold RNA structure screen and the EvoFam family identification pipeline are sensitive to the assumption that the alignments are correct, we filter sequences that are likely to be misaligned from the alignments before using them. We filter an alignment by first identifying every outer branch on which there is significantly more substitutions than expected given its length and

the substitution rate in the rest of the tree. If such a branch exists, with at least two substitutions and more than 5-fold rate change relative to expected, we then mark the entire sequence from the species to which they lead as unobserved in the given alignment.

Both the number of substitutions on the outer branches and the substitution rate in the remaining tree are estimated using PAML<sup>7</sup>.

### **Supplementary Text 10.5 - EvoP double substitution significance test**

We have developed a new, easily interpretable p-value for evaluating and ranking the predicted structures based purely on substitution evidence. See supplement of <sup>f22</sup> for details.

For a given predicted structure and an alignment that corresponds to the stem bases of this predicted structure, the p-value measures how probable it would be to see at least as many double substitutions in the aligned sequences if they do not encode a structural RNA (assuming the total number of substitutions in the alignment is fixed). We applied a previously-defined methodology<sup>27</sup>, but whereas most current methods for counting substitutions are based on pairwise sequence comparisons, the counts for this p-value are performed on the underlying phylogenetic tree to take into account the treelike nature of evolution. Similarly, we only count a pair of substitutions as a double substitution if the two substitutions occur not only in the same base-pair, but also on the same branch in the tree, since the two substitutions are only likely to be correlated if they happen in close proximity time-wise. All of the substitution counts are based on the most probable ancestral tree which we infer using PAML<sup>7</sup>.

When calculating the p-values we assume that if the aligned sequences do not encode a structural RNA each of the substitutions will have happened with equal probability along the sequence, with probabilities proportional to the branch lengths along the phylogenetic tree and with equal probabilities to all different types of substitutions. These are estimated using a Monte Carlo approach.

When a structure prediction is based on only a subset *S* of the species in the alignment, we use a very similar approach to assess to what extent the additional species support the original prediction. The only difference to the p-value defined above is that we include only the branches that do not connect the species in *S* in our analyses.

### **Supplementary Text 10.6 - Summary and enrichment statistics**

To evaluate the statistical evidence for the entire predictions sets, we calculated the following summary and enrichment statistics (Figure 9a), which in all cases are based on the subset of novel predictions as defined in <sup>22</sup>: (1) EvoFold score: mean EvoFold log-odds score of novel structures in the sets. (2) RNAz overlap enrichment: Enrichment in overlap of novel EvoFold predictions with RNAz predictions compared to a random null set. (3) DNase hypersensitivity overlap: % overlap of novel intergenic predictions with DNase I hypersensitivity sites compared to random conserved regions (see <sup>22</sup> for details). (4) Avg. correlation of tissue-specific expression within families: The average Pearson correlation coefficient of expression of novel structures within families, across tissues based on a multi-tissue RNA-seq dataset (Illumina Body Map 2 data) (P-values based on

shuffled null) (see <sup>22</sup> for details). (5) Intergenic expression enrichment: The expression of novel conserved intergenic elements relative to randomly selected intergenic regions.

Using the Illumina BodyMap 2 ribo-depleted, non-polyA selected, total RNA dataset [Illumina], we compared the expression evidence overlying the novel intergenic structures compared with a shuffled set of random structure positions chosen from the conserved intergenic regions of the genome. For the expression analysis, regions overlapping RNA repeat elements and known pseudogenes were removed from both unshuffled and random background sets, as reads are often wrongly mapped in these regions giving false expression signals. Similarly, we removed regions showing mitochondrial chromosome homology as they have increased probability of representing either ribosomal RNA or tRNA pseudogenes. 1000 shuffles were used to estimate p-values by permutation test (see <sup>22</sup> for details).

Compared to the random background, the fold increase in expression (mean reads per base) of intergenic elements that show any expression for the EvoFold, GW unfiltered, and GW filtered input sets was 1.20 X ( $P < 1E-3$ ), 1.46 X ( $P < 1E-3$ ), and 2.33 X ( $P < 1E-3$ ), respectively. Similarly, the fold increase of the average expression levels for the entire predictions sets (including elements with no expression evidence) were 1.02 X ( $P < 0.21$ ), 1.20 X ( $P < 6E-3$ ), and 1.70 X ( $P < 1E-3$ ), respectively, for the EvoFold, GW unfiltered, and GW filtered input sets.

### **Supplementary Text 10.7 - Thermodynamic analysis of EvoFold predictions using RNAz**

We used RNAz 2.0<sup>28-29</sup> to analyze the initial EvoFold predictions as well as the structures in the clustered families before and after filtering. RNAz was run on the same alignments as EvoFold. However, since the classification algorithm of RNAz is not trained for short structures, we added flanking regions to all EvoFold predictions shorter than 120 nt to obtain a minimum length of 120.

As positive control, we used a set of 356 known structural RNAs. As negative controls we (i) chose random locations within the PhastCons conserved regions that were used as input for the EvoFold analysis, (ii) we shuffled the alignment<sup>30</sup> (iii) we simulated random alignments preserving the dinucleotide content in the alignment<sup>31</sup>.

We focused on two metrics calculated by RNAz: the z-score and the classification score. The z-score is a normalized value measuring the thermodynamic stability of an RNA structure. It is the number of standard deviations a given RNA structure is more/less stable than structures for random sequences of the same length and dinucleotide content. RNAz calculates the average z-score of all sequences in an alignment. By convention, negative z-scores denote more stable structures. RNAz combines the stability z-score with an evolutionary score measuring the structural conservation and uses a support vector machine to classify an alignment as "Functional RNA" or "other".

The results of the z-score analysis show that EvoFold predictions are significantly more stable than the random controls and that the clustering and the filtering of clusters enrich for even more stable RNA secondary structures (Supplementary Fig. S10a). The same trend can be observed for the RNAz classification (Supplementary Fig. S10b). While only 1-2% of the random controls are predicted as functional RNA, 11% of the EvoFold predictions are supported by RNAz. For the

clustered families this fraction increases to 15% and 24%, for the unfiltered and filtered sets, respectively.<sup>22</sup>

### **Supplementary Text 10.8 - Data availability**

The complete set of structure predictions from the EvoFold screen as well as the candidate family predictions sets can be downloaded in bulk or browsed through a UCSC Genome Mirror from the following web-site: <http://moma.ki.au.dk/prj/mammals/>. In addition, individual families are listed and annotated in<sup>22</sup> and its supplement.

## **Supplementary Section S11: Patterns of promoter constraint**

### **Supplementary Text 11.1 - Identification of peaks in constraint in the core promoters of transcripts**

A peak in constraint was defined by an increase in Siphy- $\pi$  value over the surrounding region. Raw  $\pi$ -scores were smoothed with a windowed-mean algorithm in 8 bp windows. Local maxima were identified in the smoothed signal, and a peak recorded if the conservation score at the maximum was  $\geq 1.5X$  the average score at the base of the peak. To reduce spurious signals produced by low conservation, peaks with smoothed  $\pi$ -score less than 4 (roughly the genome-wide average) were discarded.

### **Supplementary Text 11.2 - GO enrichment**

Enrichments for Gene Ontology (GO) terms were run using the topGO package, version 1.16.2 from BioConductor<sup>25</sup>. Gene Ontology annotations for human transcripts were collected from version 58 of the Ensembl database using the Ensembl Perl API: each term within the Biological Process ontology annotated by Ensembl as being associated with a given transcript was collected, along with all of its ancestor terms, with the associated transcript and gene name. In order to avoid a lack of power due to small numbers of annotated genes, all GO annotations were used regardless of evidence code. Each independent list of genes was tested for GO term enrichment using the entire set of human transcripts as the universe, using the "classic" algorithm and Fisher's exact test statistic as implemented in topGO. P-values for enrichment were corrected for multiple testing using the Bonferroni method.

### **Supplementary Text 11.3 - Comparison to CpG and TATA-box promoter classifications**

To evaluate the relationship between the observed promoter constraint patterns with CpG and non-CpG promoters, we defined CpG promoters as those with an annotated CpG island within 200 bp of the TSS (CpG island coordinates were downloaded from UCSC) and compared these to our groups of promoter classification. CpG promoters were abundant in all classes; 66% of genes with both 'high' and 'intermittent' constraint were CpG promoters (5,083 and 9,342 genes respectively), while 41% (1,188 genes) of 'low' constraint genes were CpG promoters. In total, 63% (15,613) of the genes in our set are associated with a

CpG island. For reference, genes with TATA boxes of the “right” distance and orientation in the promoter are represented at 2-3% in each of the 3 categories.

## Supplementary Section S12: Regulatory motif discovery

### Supplemental Methods S12.1 – Regulatory motif instance identification

We use a method similar to Kheradpour<sup>32</sup> with extensions for using position frequency matrices (PFMs). We build a catalog of 688 motifs (for 345 factors) from TRANSFAC (version 11.3)<sup>33</sup>, Jaspar (version 2008)<sup>34</sup>, and large scale systematic motifs generated by Protein Binding Microarrays<sup>35-37</sup>.

For each motif, 100 shuffled motifs are generated by randomly shuffling the columns of each PFM. Because the way the information content is ordered may affect the background level of conservation (e.g. a group of specified bases surrounded by unspecified bases may be more likely to be conserved by chance than the converse due to conservation typically being “blocky”), we create three bins of information content and shuffle only within each bin. Each of the 100 shuffled motifs is then matched to the human genome and only those that have +/- 20% the number of matches are considered. The remaining motifs are then clustered at a 0.8 correlation and up to 10 control motifs are chosen in random order, allowing only one motif per cluster. Together, these procedures attempt to choose control motifs that have the same base-composition and similar higher-order compositions (through frequency matching), while being diverse.

A branch length score (BLS) is computed for each motif match in human by computing the branch length of the smallest subtree that contains human and the informant species that contain an aligned motif match. We then produce a mapping between BLS and confidence ( $1 - \text{false discovery rate}$ ) for each branch length score using  $1 - r_c / r$  where  $r$  and  $r_c$  are the fraction of motif instances and control instances, respectively, that reach at least the specified BLS. Wilson score interval with  $z=1$  is applied to both  $r$  (correcting downward) and  $r_c$  (correcting upward) in order to produce a conservative estimate of confidence in situations with few instances.

We also permit motif movement by repeating the procedure for each of the 32 windows  $w=0, 5, 10, 20, \dots, 100, 120, \dots, 500$  allowing both the motif and the control motifs to move  $w$  bases in the informant genomes relative to the position aligned to human. Consequently, for each confidence cutoff from 0.1, 0.2, ..., 0.9 the BLS and  $w$  combination that results in the highest sensitivity is chosen.

The computation of the confidence mapping benefits from having homogeneity in the regions scanned. It is important to exclude regions that may have other sources of evolutionary constraint (e.g. coding sequence) and regions that are difficult to align (e.g. repeats). Consequently, we exclude all simple repeats and repeat masked regions (downloaded from the UCSC genome browser on April 13, 2006) and use the Ensembl gene annotations (downloaded from UCSC on September 18, 2007) to exclude coding regions, 3' untranslated regions and exons from non-coding genes.

Confidence prediction is done on only autosomes, and then instances are identified on the chromosome X using the mapping produced on the autosomes but with a tree produced on



chromosome X. This is important to correct for the higher background level of conservation of chromosome X. Chromosome Y is ignored. Scaling analysis ignores instances on chromosome X.

When matching the PFMs we use a uniform background and a pseudo count of 0.001. The analysis in this paper is done at a match p-value of  $4^{-8}$  as determined by TFM-Pvalue<sup>38</sup>. Of the 688 motifs that we started with, 630 (representing 335 factors) were able to be matched at this stringency and have at least one shuffle motif.

**Supplementary Text S12.2 - Statistics on motif instances (Table S6).** Matching motifs against the genome generally matches a very large proportion of the 1,558,114,353 bases we scanned. Only considering conserved motif instances, even at a low stringency, dramatically reduces the number of bases matching a motif. Statistics also reported for best motif for each factor (i.e. the one with the highest number of instances).

**Supplementary Text S12.3 - Datasets and motifs used in motif analysis.** Datasets were identified from the literature and peaks identified in the study were used after mapping to the appropriate assembly (if necessary). For factors that also had a dataset available in mouse, we also show the number of peaks found in human that were conserved in mouse. When multiple motifs were available for a factor, we chose the one with the highest enrichment in the human dataset (ignoring conservation).

## Supplementary Section S13: Chromatin state information

**Supplementary Methods S13.1 – Overlap with 51 chromatin states in CD4 cells.** For the chromatin state analysis we first masked the portion of the genome corresponding to coding exons, RNAs, regions +/-2kb of a TSS, and pseudogenes (see Figure S18). We then evaluated the overlap of unmasked Siphy- $\omega$  10% FDR elements with a set of 51 chromatin states previously defined in CD4T cells based on the maximum posterior state assignments<sup>16</sup>. For each state we computed the ratio of the number of bases of unmasked conserved elements to the total number of bases in the state, which fell in the region that was unmasked. The reported fold enrichment was this ratio relative to the fraction of bases in unmasked regions, which overlapped unmasked bases of Siphy- $\omega$  elements.

**Supplementary Methods S13.2 – Overlap with 15 chromatin states across nine cell types.** We also evaluated overlap of Siphy- $\omega$  elements with a set of 15 chromatin states defined across 9 cell types (Figure S19). As the same location may be assigned to different chromatin states in different cell types we ordered the chromatin states in a greedy manner, that is selecting the chromatin state with the maximum enrichment for conserved bases after excluding masked regions and chromatin states previously selected. A location was associated with a state if it was assigned to that state in at least one cell type and was not assigned to any previously selected state in any cell type. Using that same ordering of states we also evaluated the cumulative enrichment for unmasked Siphy- $\omega$  bases for locations assigned to that state or a higher ranking state in at least N cell types for N=1,...,9 (Figure S20).

## Supplementary Section S14: Overall accounting of constrained elements

### Supplementary Text S14.1 Supplementary Methods

Bases in constrained elements were assigned in a hierarchical manner based on the Gencode Version 2 (Levels 1-3) annotations from hg18, such that if a constrained base overlapped multiple categories, it was assigned only to the first annotation on the list it overlapped. The annotations used and their order were: coding exons, 5' UTR, 3' UTR, core promoter (200 bp of transcription start), extended promoter (2 kb of transcription start), RNA genes, pseudogenes, introns and intergenic sequence. RNA genes consisted of both linc RNAs<sup>14</sup> and structural RNAs as defined in <http://moma.ki.au.dk/~jsp/data/rna/>. Among the constrained elements not accounted from this set, chromatin states were considered to account for unconstrained elements if they overlapped one of the 20 chromatin states with the greatest conservation in the CD4T model or one of the eight candidate promoter, enhancer, and insulator states in at least one cell type of the nine cell type model. Motif instances at the 40% confidence were used to account for constrained elements after the chromatin states.

## Supplementary Section S15: Disease-associated variants

### Supplementary Methods 15.1

To investigate the overlap between genomic variants associated with clinical phenotypes and mammalian conservation, we used results from the genome-wide association study (GWAS) database curated by NHGRI and accessed on May 30, 2011<sup>39</sup>. The overlap between GWAS hits and SiPhy- $\omega$  10% FDR elements was calculated for the autosomes and X chromosome, excluding regions that were masked during prediction of the SiPhy- $\omega$  elements, exons, and regions within 2kb of the starts of transcripts as defined by GENCODE version 3c<sup>40</sup>. We also calculated the enrichment relative to conservation of HapMap phase 2 and 3 SNPs that were assayed in the Utah residents with ancestry from northern and western Europe (the CEPH population, abbreviated CEU), from release 28<sup>41</sup>. Significance of the fold enrichment was expressed as a binomial p-value.

To find examples of conservation and regulatory motif instances overlapping GWAS-linked SNPs, we used LD from HapMap release 27<sup>41</sup>. We first used  $r^2$  measures from the CEU population to list blocks of SNPs in perfect linkage ( $r^2 = 1.0$ ) with each of the GWAS results, and scanned them against SiPhy- $\omega$  elements and the library of motif instances described in Supplementary Section S12.

## Supplementary Section S16: Codon-specific positive selection

### Supplementary Methods S16.1 - Phylogenetic analysis with the sitewise likelihood ratio

Sitewise dN/dS values were estimated by running the Sitewise Likelihood Ratio (SLR) software<sup>42</sup> on the trees and alignments from each of the parallel datasets produced by the pipeline described below. Characterizing the sitewise behavior of protein evolution in mammals was of primary interest, as the increased phylogenetic depth afforded by the added low-coverage genomes was

expected to give enough evolutionary branch length to make a sitewise analysis sensitive and specific enough to discover new regions subject to pervasive positive selection pressures within the mammalian clade. The SLR method was employed for this study, as it has been shown in simulation experiments to have desirable performance when compared to the sitewise Bayes Empirical Bayes decoding implemented in PAML, especially with regards to consistent performance between different genes<sup>42</sup>.

A brief overview of SLR's sitewise inference is as follows: first, all gene-wide parameters are estimated for a probabilistic codon model of evolution (including branch lengths, equilibrium codon frequencies, the transition/transversion ratio, and dN/dS<sub>gene</sub> corresponding to the overall dN/dS across the gene) using information from all sites in the gene. The dN/dS<sub>i</sub> at each site is then individually and independently re-estimated while holding all other parameters fixed, and a per-site likelihood ratio test is performed, calculating the independently maximized likelihood scores for each site given the null model (neutrality, dN/dS=1) and the alternative model (dN/dS ≠ 1) and comparing the resulting test statistic (twice the log-likelihood difference between the null and alternative model) to a  $\chi^2$  distribution. The Benjamini-Hochberg procedure is employed to correct for multiple tests. In addition to the likelihood ratio test results, SLR provides the estimated dN/dS<sub>i</sub> at each site and the lower and upper limits of an approximate 95% confidence interval on dN/dS formed by thresholding the likelihood curve. See<sup>42</sup> for more information and results on the size and power of the SLR test. We refer to these sitewise patterns of positive selection as localized positive selection.

### **Supplementary Methods S16.2 - Ensembl Compara gene trees pipeline**

Orthologous gene trees were generated from gene family trees in the Ensembl Compara v57 database. The Ensembl Compara gene trees pipeline<sup>43</sup> generates gene families and alignments with the following steps: (1) run all-against-all BLASTP sequence similarity searches using all annotated Ensembl proteins, (2) generate sequence family clusters from the resulting BLAST similarity matrix using the hcluster\_sg algorithm, (3) align sequences using Mcoffee's meta-alignment method, and (4) calculate gene trees using TreeBeST, which uses a given known species tree and multiple evolutionary models (including protein, codon, and DNA models) to guide the creation of gene family trees with resolved duplication events. TreeBeST combines different evolutionary models into one final gene tree topology that is then fixed. Finally, branch lengths are optimized with maximum likelihood using the HKY model. The ability of TreeBeST to combine information from multiple evolutionary models is especially important in obtaining robust tree topologies from the often partial gene predictions resulting from the low-coverage genomes in this dataset.

The Ensembl pipeline uses a novel gene-building pipeline for its annotation of low-coverage shotgun genome assemblies, as the nature of low-coverage genomes causes problems with the standard pipeline<sup>44</sup>. Ensembl's low-coverage gene building pipeline is based on whole-genome alignments of each low-coverage genome to an annotated reference genome (human in the case of the present mammalian genomes), built using BLASTz and axtTools. Scaffolds are arranged into "gene-scaffolds" based on the reference genome annotation, and frame-shifting indels in the low-coverage sequence (which are the result of sequence / assembly error in the vast majority of cases) are corrected by inserting 1- or 2-bp "frame-shifting" introns into the low-coverage gene model.

When the whole-genome alignment implies that the low-coverage sequence is missing an entire internal exon, a run of 'X's is inserted into the gene model in order to produce the correct translation length.

### **Supplementary Methods S16.3 - Isolating nearly-orthologous mammalian sub-trees**

The full Compara gene family trees represent the deep evolutionary history of a gene, including duplication and speciation events going as far back as the protein-protein BLAST searches will reach. As a result, some gene trees comprise several hundred sequences with many nearly complete sets of orthologous sub-trees related by ancient duplication events. Although this property of the trees may be useful for other analysis, we wished to avoid measuring functional divergence following gene duplication in this study. Furthermore, we also wanted to restrict our analysis to genes that are well-represented in mammals to avoid including artifactual lineage-specific genes resulting from over-annotation or assembly error.

To mitigate both of the above issues for this analysis, a simple algorithm was used to filter out trees without sufficient taxonomic coverage and to split trees with ancient duplication events into roughly orthologous sub-trees. For each node starting from the root, the tree was split into two sub-trees and both sub-trees were included in the analysis if they both satisfied the following criteria: (1) contained genes from at least two out of four mammalian families (Primates, Glires, Laurasiatheria, Afrotheria) and (2) contained at least one gene from one of the outgroup species (chicken, tetraodon, opossum). If the entire tree did not satisfy the two conditions, it was dropped from the analysis. The application of this tree-splitting algorithm to the Ensembl Compara v57 database, which contains 19,298 full gene trees covering 21,317 human genes, yielded the set of 15,451 trees (or sub-trees) containing 17,709 human genes used in this analysis.

### **Supplementary Methods S16.4 - Sequence quality and alignment filtering**

The accuracy of homology assignments is a major concern in all evolutionary studies, and the issue becomes critically important in site-wise analyses: because there is no averaging of evolutionary measures over the length of a gene, a single mis-aligned codon could directly lead to a false positive in the sitewise analysis of selective pressures, artificially raising the proportion of observed positively-selected codons. In the present study, there was also concern that the higher sequencing error rates in low-coverage genomes could lead to elevated estimates of evolutionary rates and dN/dS ratios.

In order to minimize these potential sources of error, we masked out regions of the multiple alignments based on sequence quality scores and an alignment quality metric. For sequence quality, we masked out codons (replacing the codon's nucleotides with 'N' characters) in low-coverage genomes where any of the three nucleotides in the codon had a PHRED or PHRED-equivalent score equal to or below 20. Quality scores for the source assemblies in Ensembl v57 were retrieved from Ensembl, UCSC or the source sequencing centers. For alignment quality, we used the approach employed by Pollard et al<sup>45</sup> of filtering out alignment columns which did not contain at least 3 Primate sequences, 2 Glires sequences, and 1 outgroup sequence. Outgroup species were defined as any species not within the Primate, Glires, or Laurasiatheria clades.

### **Supplementary Methods S16.5 - Clade-specific datasets**

Although the SLR method does not include models comparable to PAML's branch-site models<sup>46</sup> for lineage-specific sitewise analysis, the mammalian evolutionary tree contains a number of similarly-sized and closely-related clades which are amenable to independent evolutionary analysis. In order to investigate independent sitewise selective pressures in mammalian sub-clades, we ran the sitewise pipeline on alignments restricted to each of the Primates, Glires, and Laurasiatheria clades. Although the Afrotheria clade is also situated nearby in the mammalian tree, it was excluded from this analysis due to the low number of available genomes (3). Each sub-clade pipeline run used alignments generated from the full mammalian gene alignments by removing any sequences from species outside the clade, and subsequently removing any columns containing only gaps. The sequence and alignment quality filtering was applied to the full mammalian alignments, and any masked sequences or alignment columns were carried over to the sub-clade alignments.

### **Supplementary Methods S16.5 - Gene Ontology term enrichment analysis**

The topGO package for R/Bioconductor<sup>25</sup> was used to evaluate genes containing elevated dN/dS or positively-selected codons for enrichment in Gene Ontology (GO) terms. GO term annotations from v60 of the Ensembl human annotation set were used. Two sets of genes were defined: genes under weak constraint having  $dN/dS[gene] > 0.4$ , and genes undergoing significant positive selection with at least one confidently positively selected codon (at  $FDR < 0.05$ ). The topGO package was used to perform a series of Fisher's exact tests for enrichment, using the set of all genes analyzed in this study as the gene 'universe'. A Bonferroni correction was applied to enrichment p-values to correct for multiple testing, and only terms enriched at  $p < 0.05$  after correction were retained.

### **Supplementary Methods S16.6 - Pfam protein domain analysis**

Alignment sites were annotated with Pfam domains using v57 of the Ensembl human annotation set, yielding 2.2 million sitewise values annotated with 3,116 Pfam IDs. Each Pfam domain was summarized according to its number of annotated sites, number of genes covered, mean estimated dN/dS value, and fraction of positively-selected sites. Because the overall proportion of positive selection in mammals is quite low, domains covering either fewer than 500 sites or fewer than 5 genes were dropped from the analysis to avoid spurious results from a small number of misalignments or stochastic effects.

For the present analysis, domains were separately sorted by the mean dN/dS value and the fraction of positive selection. In order to separate domains best characterized by weak selective constraint and intermittent positive selection from those best characterized by strong constraint and localized selection, the top 10 domains for each sorting criterion were compared; results are shown in Table 5.1.3a. Domains placed within the top 10 under both sorting criteria are shaded in grey, and potentially interesting domains under the fraction of positive selection criterion are highlighted in bold.

### **Supplementary Methods S16.7 - Data availability**

See <http://www.ebi.ac.uk/~greg/mammals/> for data resulting from the sitewise analysis. Summary statistics and plots for each gene can be accessed online, and all data generated (including trees, alignments, sitewise results, and tables of domains & GO terms) are available either to download in bulk or as UCSC browser tracks.

### **Supplemental Text S16.8 (Table S9) - Summary of sitewise selection pressures in mammals, primates, glires, and laurasiatheria**

Notes: A number of summary calculations were performed on each of the four sitewise datasets. Columns labeled 'dN/dS X' contain the fraction of sites where the maximum-likelihood estimate of dN/dS is above or below the given value. 'Domain instances' shows the total number of Pfam domain instances gathered from Ensembl v57, and 'Domain types' shows the number of unique Pfam IDs gathered. 'Positive domain instances' and 'Positive domain types' show the same calculations for the subset of domain instances containing significantly positively-selected sites. 'Positive genes' and 'Positive sites' similarly show the number of genes and sites containing significant evidence for positive selection (after multiple-testing correction).

### **Supplemental Text S16.10 (Table S12) - GO enrichments**

Notes: All terms were first sorted by 'pval.fis.bonf' (the Bonferroni-corrected p-value for enrichment) and a threshold of  $p < 0.05$  was applied. Terms were subsequently sorted by 'pval.elim' for display purposes. Terms mentioned in the text are in bold.

Tables containing complete results for all GO enrichments are available from the above webpage.

### **Supplemental Text S16.11 (Table S13) - Domain analysis**

Notes: Rows were sorted either by mean dN/dS or by fraction of positive sites, and the top 10 domains for each set were retained. Those domains showing up in the top 10 on both lists were grayed out. Domains mentioned in the text are in bold.

## **Supplementary Section S17: Exaptation of ancestral repeat elements**

**Supplementary Methods S17.1** - A detailed analysis of mobile elements exapted to act as putative regulatory elements in the human genome is described in a companion paper<sup>47</sup>.

To create a subset of putative regulatory regions we began with the set of conserved elements defined by phastCons<sup>20</sup>. We then removed all conserved elements that overlap protein-coding exons, untranslated regions, or exons from non-coding RNA genes. The resulting set consists of ~2.6 million conserved non-exonic elements (CNEEs). These CNEEs are under selection, but do not appear in mature transcripts, suggesting that they are likely to be functional at the DNA level and act to regulate the expression of nearby genes<sup>48</sup>.

To understand which of these putative regulatory elements in the human genome are the results of mobile element insertions we examined the overlap of our CNEEs with mobile element annotations generated by RepeatMasker ([www.repeatmasker.org](http://www.repeatmasker.org)). To be conservative, we did not keep all CNEEs that overlapped a mobile element insertion, but only those, which had a majority of the

bases annotated as originating in a SINE, LINE, LTR, or DNA transposon insertion. This resulted in a set of 284,857 conserved non-exonic elements, totaling nearly 7Mb of sequence, which have been exapted from mobile element insertions.

To date exaptation events we used the genome-wide multi-species alignment. For each exaptation we began with the most divergent group of species and calculated if half, or more, of the bases in the CNEE were aligning to any species in the group. This was iterated with progressively closer species until more than half of the CNEE bases were present in the most recent common ancestor of human and the group of species being used. The exaptation event was placed on the branch of the human lineage above the ancestor that appears to have contained at least half of the CNEE bases.

## Supplementary Section S18: Human and Primate accelerated regions

### Supplementary Text S18.1 - Human acceleration in Primate conserved elements

A second set of HARs was identified using candidate elements that were only required to show conservation in primates (though many are also more deeply conserved). These 920,486 primate-conserved sequences are similar in their genomic distribution to the 1.3 million mammalian-conserved regions used in the primary HAR analysis. They are 92.4% non-coding, with 11.1% overlapping experimentally identified enhancers. Interestingly, a much larger proportion of these primate-conserved regions are accelerated in human (1930 or 0.2% of primate-conserved elements vs. 0.04% of mammalian-conserved elements), suggesting that lineage-specific evolution is more common in less deeply conserved functional elements. Like the primary set of HARs, these 1,930 HARs are slightly depleted in coding sequences and occur as often as expected in enhancers compared to the set of primate-conserved regions from which they were identified.

### Supplementary Text S18.2 - Evidence of biased gene conversion in accelerated regions

GC-biased gene conversion (gBGC) is a non-adaptive, recombination-associated process that increases the rate of fixation of AT to GC polymorphisms (i.e., weak-to-strong changes). Since gBGC can mimic selection and accelerate the overall rate of substitutions, we checked for biases in the pattern of human substitutions in HARs in order to assess evidence that these regions could have been shaped by gBGC.

On average, HAR sequence GC-content is nearly identical in human (39.0%) and the inferred human-chimp ancestor (38.1%). Of 550 HARs with sufficient outgroup alignment data to count substitutions of each type, 284 (51.6%) have more weak-to-strong than strong-to-weak substitutions on the human lineage. These HARs, and not any others, show an increase in GC-content on the human lineage. On average, this change represents a 1% increase in GC-content. A few HARs show more extreme patterns of weak-to-strong bias and larger increases in GC-content. Human substitutions in seventy-three HARs (13.3%) are all weak-to-strong (compared to 6.4% all strong-to-weak) and result in greater than 5% increases in GC-content on the human lineage. Since HAR ancestral GC-content is 38.1%, there is greater mutational opportunity for weak-to-strong compared to strong-to-weak changes on the human lineage. Hence, these findings suggest that while gBGC may have shaped the evolution of some HARs, most of the signal of human acceleration in HARs cannot be explained by gBGC or other GC-biased mutation or fixation processes.



We did not conduct a parallel analysis of substitutions in PARs, because gBGC is not a likely explanation for the substitution patterns in these elements. In particular, our filtering and statistical testing methods ensure that most PARs have higher than expected rates of substitutions in multiple primate lineages. Since recombination rates are highly variable at the PAR length-scale (hundreds of base pairs) between even closely related primates and recombination hotspots are not expected to occur at the same place on multiple branches on the primate phylogeny, it is highly unlikely that gBGC would have shaped substitutions across the primates.

### **Supplementary Text S18.3 - Gene Ontology (GO) enrichment analysis of accelerated regions versus positively and negatively selected codons**

To explore potential functional effects of sequence changes in fast-evolving regions of the mammalian genome, we conducted statistical enrichment analyses of Gene Ontology (GO) terms associated with HARs and PARs (which are mostly non-coding) and compared these results with those for positively and negatively selected codons. Interestingly, there are many more enriched terms in common between the HARs or PARs and negatively selected codons than between HARs or PARs and positively selected codons. One notable exception is a set of GO terms associated with extra-cellular signaling (e.g., “cell surface”, “extra cellular space”, “receptor activity”, “signal transducer activity”) that are enriched in loci that are fast-evolving at both the coding and non-coding levels. Also, terms related to immunity feature in both sets, albeit somewhat distinct aspects of the immune system. In contrast, developmental pathways and processes (e.g., “axon guidance”, “ureteric bud development”) are much more commonly enriched in the HARs and PARs, suggesting a prominent role for developmental gene expression divergence in primate and human adaptations.

Although these results could be affected by myriad factors including gene density and genome-scale mutation rate heterogeneity, they seem to suggest that regulatory changes tend to occur more frequently in genes under strong purifying constraint, and rarely in genes experiencing adaptive or diversifying selection. Thus, distinct processes and pathways appear to have been under selection at the regulatory versus protein level in mammals.

### **Supplementary Text S18.4 - Gene Ontology (GO) enrichment analysis of HARs versus PARs**

Contrasting the HAR and PAR GO enrichment results may indicate specific functions underlying human-specific biology. In fact, HARs and PARs are associated with largely different sets of enriched GO terms, although they share a small number of terms including “homophilic cell adhesion” and “astacin activity”. Interestingly, HARs are preferentially enriched for GO terms related to transcriptional regulation, the cell cycle, and MHC receptor activity compared to PARs. Furthermore, while HARs are enriched for some neuronal terms, they do not show strong enrichment for annotations related to axonogenesis, which are highly enriched among PARs. These results are not sensitive to the use of a 1Kb versus 100Kb window for mapping GO terms onto HARs and PARs. These findings indicate that although some biological systems are universally fast-evolving, adaptation appears to occur through somewhat distinct mechanisms in different clades.

### **Supplementary Methods S18.5 - HAR and PAR detection**

Genomic regions with accelerated substitution rates in the human and primate lineages were identified by first defining candidate elements conserved across all mammals excluding the lineage of interest (human or primates). Conserved elements were identified using the phastCons program from the PHAST package (<http://compugen.bscb.cornell.edu/phast>) with expected length = 45, target coverage = 0.3, and expected conservation level = 0.3. Conserved elements were filtered to remove potential alignment and assembly errors using annotations from the UCSC genome browser database. Our strict inclusion criteria were: level 1 or level 2 non-gap synteny between human and all of macaque, mouse, and dog (netSynteny); no pseudogenes (luNega and pseudoYale); no segmental duplications (genomicSupDups); no repeat elements (rmsk); and no human paralogs (selfChain). After filtering, there were 1,322,576 mammalian conserved elements for human lineage-specific tests and 1,255,037 for primate clade-specific tests. Note that the exclusion of either human or all primates when running phastCons means that these sets are not identical to each other or to the set of phastCons elements used elsewhere in this study.

These sets of filtered conserved elements were scored for accelerated substitution rates in the subtree of interest (human or primates) compared to the rest of the tree using the likelihood ratio test (LRT) method implemented in the phyloP program from the PHAST package<sup>45,49</sup>. Acceleration p-values were adjusted for multiple comparisons using the FDR-controlling method of Benjamini and Hochberg<sup>50</sup>.

Intersections with genome annotations and experimentally identified enhancers were performed using the featureBits program from the kent libraries and custom scripts. Genomic coordinates of experimentally identified enhancers obtained from the supplemental materials of Visel *et al.*<sup>51</sup> and Heintzman *et al.*<sup>52</sup> were mapped to the human genome assembly (hg18) using the liftOver program from the kent libraries and alignment chains from the UCSC genome browser database.

Transcription factor binding sites were predicted on both strands of the human and chimpanzee sequences of each HAR using position specific weight matrices derived from motifs of the 11 JASPAR transcription factor families with pseudo-counts<sup>34</sup>. For each family, statistically significant binding potential was determined using the balanced cutoff method of Rahmann *et al.*<sup>53</sup>. The total number of predicted binding sites was determined separately for human and chimp in each HAR for each JASPAR family. For each HAR and each family, these counts were transformed into a divergence score by taking the absolute difference in the number of sites between human and chimp and dividing by the length of the HAR. The minimum, maximum, and mean values of the divergence score across all HARs were computed for each family and for all families together.

### **Supplementary Methods S18.6 – Checking HARs for evidence of gBGC**

To check if the accelerated substitution rates in HARs might be driven by GC-biased gene conversion, we calculated GC content and proportion of changes from weak-to-weak, weak-to-strong, strong-to-strong, and strong-to-weak along the human branch for each HAR. To do so, we first reconstructed the ancestral sequence, using chimp, gorilla, and organutan as outgroups. The procedure for reconstructing the ancestral sequence was majority rule parsimony, but also minimized the number of changes from weak to strong and strong to weak in cases where there was no majority. Specifically, the procedure was as follows: If any one outgroup nucleotide

matched the ingroup, the ancestral nucleotide was assigned that nucleotide. However, if none of the outgroup nucleotides matched the ingroup, the nucleotide with the maximum number of outgroup species in agreement was used (e.g., ingroup = A, outgroups = {CCG}; ancestor is assigned C). If there was no majority, the nucleotide was assigned based on whether the ingroup nucleotide was weak or strong (e.g., ingroup = A, outgroups = {C,G,T}; ancestor is assigned T).

### **Supplementary Methods S18.7 - Gene Ontology enrichment analyses**

Functional enrichment/depletion analysis of fast-evolving regions was conducted by mapping Gene Ontology (GO) terms onto our data sets as follows. In all cases, we considered both the full set of GO terms and the GOSlim subset from the GOA project (<ftp://ftp.ebi.ac.uk/pub/databases/GO/goa/goslim/>).

We first mapped GO terms to UCSC known genes using the go.goaPart table of the UCSC genome browser. Then, we associated a term with any of the 1.32 million candidate phastCons elements located within 1Kb (or 100Kb) of a transcribed known gene annotated with that term. In this case, the “universe” for enrichment/depletion analysis is the set of candidate phastCons elements and the “foreground” set is the subset of these elements that is significantly accelerated in humans (HARs). By conducting enrichment/depletion tests at the level of phastCons elements, we automatically account for the many-to-many mappings of these elements to genes and GO terms. A parallel mapping pipeline was applied to the PARs. Both pipelines were implemented using Perl and MySQL (DBI) with local copies of the UCSC databases.

Each GO term was tested for enrichment and depletion in each of the “universe” versus “foreground” comparisons described above using two one-sided Fisher exact tests implemented in custom R (<http://r-project.org>) scripts. Unadjusted and Bonferroni-corrected p-values were used to evaluate statistical significance.

**Supplemental Text S18.7 – Explanation of Table S15-predicted transcription factor binding sites per 100bp across all HARs for each of the 11 JASPAR families.** Min=minimum number of hits for a given family in a single HAR. Max=maximum number of hits for a given family in a single HAR. Mean=average number of hits for a given family per HAR.

## Supplementary Data Sets

**Data access:** A complete set of data files can be downloaded from or viewed in:

1. The Broad website (<https://www.broadinstitute.org/scientific-community/science/projects/mammals-models/29-mammals-project-supplementary-info>)
2. UCSC (<http://genomewiki.cse.ucsc.edu/index.php/29mammals>)
3. IGV (<http://www.broadinstitute.org/igv/projects/29mammals>).

### Constrained Elements (SiPhy -omega, & pi)

**Summary:** Lists of constrained elements. For each 12-mer in the human genome a measure of constraint was scored using SiPhy (see reference below), both as a rate-based score (omega), and a measure that includes biased substitution patterns (pi). Those falling in annotated Ancestral Repeats were used as a background. An empirical cutoff score was set corresponding to 10% FDR, and all 12-mers above this score were considered significant. Overlapping significant 12-mers were clustered to yield larger elements. The HMRD SiPhy -omega 50-bp set used for comparison is also made available.

#### Files:

29way\_omega\_lods\_elements\_12mers.chr\_specific.fdr\_0.1\_with\_scores.txt.gz  
 29way\_pi\_lods\_elements\_12mers.chr\_specific.fdr\_0.1\_with\_scores.txt.gz  
 HMRD\_omega\_lods\_elements\_50mers.chr\_specific.fdr\_0.1\_with\_scores.txt.gz

**Format:** 'Chromosome Start End Lods-score Branch-length'

**Format note:** coordinates are 0-based, inclusive (meaning the End position is considered part of the element), and on hg18

**Contact:** Or Zuk <orzuk@broad.mit.edu>, Manuel Garber <mgrarber@broadinstitute.org>

**Reference:** Garber, M. *et al.* Identifying novel constrained elements by exploiting biased substitution patterns. *Bioinformatics* **25**, i54-62, doi:btp190 [pii] 10.1093/bioinformatics/btp190 (2009).

### Heights (omega,pi)

**Summary:** Base-level measure of constraint scored using SiPhy (see reference above), both as a rate-based score (omega) and a measure that includes biased substitution patterns (pi).

#### Files:

omega.12mers.wig.gz  
 Format: 'position log\_odds\_score'  
 pi.ewig.gz  
 Format: 'postion %A %C %G %G log\_odds\_score'

**Format note:** coordinates on hg18

Contact: Manuel Garber <mgarber@broadinstitute.org>

### **Protein-coding exons**

Summary: A list of identified previous annotation and (Reference annotation) novel conserved exons (Congo). Exons were identified using a version of CONGO (previously developed for the *Drosophila* genomes, see reference below) enhanced to handle mammalian exon prediction. The enhancements include a semi-Markov feature to model the short length distribution of mammalian exons, a synteny feature for recognizing duplicated regions, and an alternative training function to improve accuracy when performing an unbalanced prediction task (only ~1.5% of the human genome is protein-coding).

Files: ReferenceAnnotation\_hg18.20101019.new.syn.gtf  
CONGO\_hg18.20101019.new.syn.gtf

Format: GTF

Format note: coordinates on hg18

Contact: Mike Lin <mikelin@mit.edu>

Reference: Lin, M. F. *et al.* Revisiting the protein-coding gene catalog of *Drosophila melanogaster* using 12 fly genomes. *Genome Res* **17**, 1823-1836, doi:gr.6679507 [pii] 10.1101/gr.6679507 (2007).

### **Synonymous Constraint Elements**

Summary: Identified coding regions with a very low synonymous substitution rate – indicating additional sequence constraints beyond the amino acid level. The Synonymous Constraint Elements (SCEs) are defined at three different resolutions (9-, 15-, and 30-codon). There is also a bedGraph track for the local estimate of the synonymous substitution rate ( $\lambda_s$ ). Also available at: <http://compbio.mit.edu/SCE/>

File: SynonymousConstraintElements.tar.gz

Files in archive:

SCE9.hg18.bed.gz

SCE15.hg18.bed.gz SCE30.hg18.bed.gz

$\lambda_s$ \_ORF.hg18.bedGraph.gz

File formats: BED, bedGraph

Format note: coordinates are on hg18

Contact: Mike Lin <mikelin@mit.edu>

### **RNA structures**

Summary: The list of candidate predictions for structural RNA families. EvoFold structural predictions were based on a 31-way subset of the genome-wide 44-way multiZ alignment

(consisting of 28 of the 29 eutherian mammals, together with opossum, chicken, and tetraodon as outgroups) and clustered into candidate families using the novel EvoFam algorithm. This data, as well as the complete set of structure predictions from the EvoFold screen can be downloaded in bulk or browsed through a UCSC Genome Mirror from the following web- site:

<http://moma.ki.au.dk/prj/mammals/>.

In addition, individual families are listed and annotated in the following reference and its supplement.

File: StructuralRNAfamilies.tar.gz

Files in archive:

Genome\_wide\_prediction\_set  
Genome\_wide\_with\_paralogs\_prediction\_set  
UTR\_with\_paralogs\_prediction\_set  
data\_format.txt

Format: described in the file: data\_format.txt

Format note: coordinates are hg18

Contacts: Brian Parker [bparker@binf.ku.dk](mailto:bparker@binf.ku.dk), Jakob Skou Pedersen [jakob.skou@ki.au.dk](mailto:jakob.skou@ki.au.dk)

Reference: Parker, B. J. *et al.* New families of human regulatory RNA structures identified by comparative analysis of vertebrate genomes. *Genome Research* (2011).

### **Constraint Structure in Promoters**

Summary: A list of local maxima identified from the smoothed pi-scores in the core promoters of genes.

File: peaks.positions.gz

Format: 'Chromosome Start End Score'

Format note: Coordinates are 1-based and exclusive (meaning the End base is not included in the peak position). All positions are at a single base, and are on hg18.

Contact: Evan Mauceli <[evan@broadinstitute.org](mailto:evan@broadinstitute.org)>

### **Motif instances**

Summary: A list of instances of identified regulatory motifs. A motif catalog was built from TRANSFAC, Jaspar, and Protein Binding Microarrays using a method similar to that described in the reference below, with extensions for position frequency matrices. Motif instances were identified genome-wide using a FDR of 60%.

File: instances-thresh8-0.4.txt.gz

Format: Motif-name Chromosome Start End Strand

Format note: coordinates are 1-based, inclusive (meaning the End position is considered part of the element), and on hg18

Contact: Pouya Kheradpour [pouyak@mit.edu](mailto:pouyak@mit.edu)

Reference: Kheradpour, P., Stark, A., Roy, S. & Kellis, M. Reliable prediction of regulator targets using 12 Drosophila genomes. *Genome Res* **17**, 1919-1931, doi:gr.7090407 [pii] 10.1101/gr.7090407 (2007).

### Chromatin Mark Data

Summary: ENCODE segmentation of hg18 into chromatin states for each of nine human cell types. States were learned using a Hidden Markov Model that computationally integrated CHIP-seq data into fifteen states associated with different types of functionality. This data is available from UCSC at:

<http://genome-preview.ucsc.edu/cgi-bin/hgTrackUi?hgsid=2563118&c=chrX&g=wgEncodeBroadHmm>

A similar segmentation based on the CD4T cell line is also provided in the file:

#### Files:

[map\\_allstates.bed.txt.gz](#) – segmentation based on CD4T cell line  
[chromatinMarks.tar.gz](#)

#### Files in archive:

[wgEncodeBroadHmmGm12878HMM.bed](#) – modelling in GM12878 cells  
[wgEncodeBroadHmmH1hescHMM.bed](#) – modelling in H1-hESC cells  
[wgEncodeBroadHmmHmecHMM.bed](#) – modelling in HMEC cells  
[wgEncodeBroadHmmHsmmHMM.bed](#) – modelling in HSMM cells  
[wgEncodeBroadHmmHuvecHMM.bed](#) – modelling in HUVEC cells  
[wgEncodeBroadHmmHepg2HMM.bed](#) – modelling in HepG2 cells  
[wgEncodeBroadHmmNhekHMM.bed](#) – modelling in NHEK cells  
[wgEncodeBroadHmmK562HMM.bed](#) – modelling in K562 cells  
[wgEncodeBroadHmmNhlhHMM.bed](#) – modelling in NHLF cells

File format: BED

Contact: Jason Ernst [jernst@mit.edu](mailto:jernst@mit.edu)

#### References:

Ernst J and Kellis M. [Discovery and characterization of chromatin states for systematic annotation of the human genome](#). *Nature Biotechnology* 2010 Jul 25;28:817-825.

J. Ernst, P. Kheradpour, T.S. Mikkelsen, N. Shores, L.D. Ward, C.B. Epstein, X. Zhang, L. Wang, R. Issner, M. Coyne, M. Ku, T. Durham, M. Kellis, B.E. Bernstein  
 Mapping and analysis of chromatin state dynamics in nine human cell types.  
*Nature* 473: 43-49, 2011.

### Accounting for conserved elements

Summary: A list of each conserved element (omega), the chromatin state it resides in, and, if applicable, any genic annotation it overlaps, as well as any overlapping motif instances.



File: elementPartition.txt.gz

File Format:

Column 1: 'ELEMENT:'

Column 2-6: 'Chromosome Start End Lods-score Branch-length'

Column 3-4\*: 'chromatin: 'cell-type:chromatin-state-' for 9 cell types. \*if a conserved element overlaps multiple chromatin states, then the consecutive states appear in consecutive columns

Column 5-6 (if applicable): 'gencode:' annotation

Column 7-8 (if applicable); 'motifs:' overlapping motifs for this element

Chromatin state numbers and candidate annotations:

State 1 – Active Promoter

State 2 – Weak Promoter

State 3 – Inactive/Poised Promoter

State 4,5 – Strong enhancer

State 6,7 – Weak enhancer

State 8 – Insulator

State 9 – Transcriptional transition

State 10 – Transcriptional elongation

State 11 – Weak transcribed

State 12 – Polycomb-repressed

State 13 – Heterochromatin; low signal

State 14,15 – Repetitive/Copy Number Variation

Contact: Evan Mauceli [evan@broadinstitute.org](mailto:evan@broadinstitute.org)

### **Associated GWAs SNPs overlapping constraint**

Summary: SNPs and data from the NHGRI GWAS catalog, 5/30/11

File: conserved\_gwas.xlsx

File format: Microsoft Excel Workbook

Contact: Luke Ward [lucas.d.ward@gmail.com](mailto:lucas.d.ward@gmail.com)

### **Positively selected codons**

Summary: Main data files and backing data for the analysis identifying positively selected codons. This data and updates are available for download from here:

<http://www.ebi.ac.uk/goldman-srv/mammals/>

File: PositivelySelectedCodons.tar.gz

Files in archive:

Pol\_sel\_score.bed - one region per Ensembl gene analyzed, with a score corresponding to the negative log of an overall p-value for positive selection at that gene based on mammalian alignments.

Overall dN\_dS.bed - one region per Ensembl gene analyzed, with a score corresponding to the overall dN/dS at that gene based on mammalian alignments.

Sites.bedGraph - one value per codon analyzed, with a score corresponding to the signed sitewise likelihood ratio statistic for non-neutral selection. Values above zero indicate evidence for positive selection, values below zero indicate evidence for negative selection. The statistic is approximately chi-square distributed when the data is neutrally evolving. The bedGraph file looks best when displayed on UCSC the following track parameters:

```
type=bigWig
lineMark=0
lineOnOff=on
autoScale=off
viewLimits=-20:10
minLimit=-20
maxLimit=10
visibility=full
```

mammals\_e57\_sitewise\_tables.Rdata - the .Rdata file which contains the main results tables (genes and sites)

web/ - directory containing the 'complete archive' package which contains alignments, PDFs, and other data used during the analysis

File formats: BED, bedGraph, Rdata

Format note: coordinates are on hg18

Contact: Gregory Jordan [greg@ebi.ac.uk](mailto:greg@ebi.ac.uk)

### **Exapted repeats**

Summary: List of exapted elements identified as described in the following reference.

File: exaptedElements.bed.gz

File format: BED

Format note: coordinates are on hg18

Contact: Craig Lowe [craiglowe@gmail.com](mailto:craiglowe@gmail.com)

Reference: Lowe, C. B. & Haussler, D. 29 mammalian genomes reveal novel exaptations of mobile elements for likely regulatory functions in the human genome. *In preparation* (2011).

### **Human and Primate Accelerated Regions**

Summary: Lists of human accelerated regions (HARs) and primate accelerated regions (PARs). Regions with accelerated substitution rates in either lineage were identified by first defining candidate elements using the phastCons program (not including the lineage of interest) and then scoring those elements for accelerated substitution rates in the subtree (human or primate) of interest.

Files:

2xHARs.bed

2xPARs.bed

Format: BED

Format note: coordinates are on hg18

Contact: Katherine Pollard <katherine.pollard@gladstone.ucsf.edu>

## Supplementary References.

- 1 Margulies, E. H. *et al.* An initial strategy for the systematic identification of functional elements in the human genome by low-redundancy comparative sequencing. *Proc Natl Acad Sci U S A* **102**, 4795-4800, doi:0409882102 [pii] 10.1073/pnas.0409882102 (2005).
- 2 Mikkelsen, T. S. *et al.* Genome of the marsupial *Monodelphis domestica* reveals innovation in non-coding sequences. *Nature* **447**, 167-177, doi:nature05805 [pii] 10.1038/nature05805 (2007).
- 3 Jaffe, D. B. *et al.* Whole-genome sequence assembly for mammalian genomes: Arachne 2. *Genome Res* **13**, 91-96, doi:10.1101/gr.828403 (2003).
- 4 Gnerre, S., Lander, E. S., Lindblad-Toh, K. & Jaffe, D. B. Assisted assembly: how to improve a de novo genome assembly by using related species. *Genome Biol* **10**, R88, doi:gb-2009-10-8-r88 [pii] 10.1186/gb-2009-10-8-r88 (2009).
- 5 Hubisz, M. J., Lin, M. F., Kellis, M. & Siepel, A. Error and Error Mitigation in Low-Coverage Genome Assemblies. *PLoS ONE* (2011).
- 6 Paten, B., Herrero, J., Beal, K., Fitzgerald, S. & Birney, E. Enredo and Pecan: genome-wide mammalian consistency-based multiple alignment with paralogs. *Genome Res* **18**, 1814-1828, doi:gr.076554.108 [pii] 10.1101/gr.076554.108 (2008).
- 7 Yang, Z. PAML 4: phylogenetic analysis by maximum likelihood. *Mol Biol Evol* **24**, 1586-1591, doi:msm088 [pii] 10.1093/molbev/msm088 (2007).
- 8 Garber, M. *et al.* Identifying novel constrained elements by exploiting biased substitution patterns. *Bioinformatics* **25**, i54-62, doi:btp190 [pii] 10.1093/bioinformatics/btp190 (2009).
- 9 Keinan, A., Mullikin, J. C., Patterson, N. & Reich, D. Measurement of the human allele frequency spectrum demonstrates greater genetic drift in East Asians than in Europeans. *Nat Genet* **39**, 1251-1255, doi:ng2116 [pii] 10.1038/ng2116 (2007).
- 10 Lin, M. F. *et al.* Revisiting the protein-coding gene catalog of *Drosophila melanogaster* using 12 fly genomes. *Genome Res* **17**, 1823-1836, doi:gr.6679507 [pii] 10.1101/gr.6679507 (2007).
- 11 Lin, M. F., Deoras, A. N., Rasmussen, M. D. & Kellis, M. Performance and scalability of discriminative metrics for comparative gene identification in 12 *Drosophila* genomes. *PLoS Comput Biol* **4**, e1000067, doi:10.1371/journal.pcbi.1000067 (2008).
- 12 DeCaprio, D. *et al.* Conrad: gene prediction using conditional random fields. *Genome Res* **17**, 1389-1398, doi:gr.6558107 [pii] 10.1101/gr.6558107 (2007).
- 13 Birney, E. *et al.* Identification and analysis of functional elements in 1% of the human genome by the ENCODE pilot project. *Nature* **447**, 799-816, doi:10.1038/nature05874 (2007).
- 14 Guttman, M. *et al.* Ab initio reconstruction of cell type-specific transcriptomes in mouse reveals the conserved multi-exonic structure of lincRNAs. *Nat Biotechnol* **28**, 503-510, doi:nbt.1633 [pii]

- 10.1038/nbt.1633 (2010).
- 15 Finn, R. D. *et al.* The Pfam protein families database. *Nucleic Acids Res* **38**, D211-222, doi:gkp985 [pii]
- 10.1093/nar/gkp985 (2010).
- 16 Ernst, J. & Kellis, M. Discovery and characterization of chromatin states for systematic annotation of the human genome. *Nat Biotechnol* **28**, 817-825, doi:nbt.1662 [pii]
- 10.1038/nbt.1662 (2010).
- 17 Ernst, J. *et al.* Mapping and analysis of chromatin state dynamics in nine human cell types. *Nature* **473**, 43-49, doi:nature09906 [pii]
- 10.1038/nature09906 (2011).
- 18 Lin, M. F., Jungreis, I. & Kellis, M. PhyloCSF: a comparative genomics method to distinguish protein-coding and non-coding regions. *Nature Precedings*, doi:<http://hdl.handle.net/10101/npre.2010.4784.1> (2010).
- 19 Lin, M. F. *et al.* Locating protein-coding sequences under selection for additional, overlapping functions in 29 mammalian genomes. *Genome Research* (2011).
- 20 Siepel, A. *et al.* Evolutionarily conserved elements in vertebrate, insect, worm, and yeast genomes. *Genome Res* **15**, 1034-1050, doi:gr.3715005 [pii]
- 10.1101/gr.3715005 (2005).
- 21 Pedersen, J. S. *et al.* Identification and classification of conserved RNA secondary structures in the human genome. *PLoS Comput Biol* **2**, e33, doi:10.1371/journal.pcbi.0020033 (2006).
- 22 Parker, B. J. *et al.* New families of human regulatory RNA structures identified by comparative analysis of vertebrate genomes. *Genome Research* (2011).
- 23 Nawrocki, E. P., Kolbe, D. L. & Eddy, S. R. Infernal 1.0: inference of RNA alignments. *Bioinformatics* **25**, 1335-1337, doi:btp157 [pii]
- 10.1093/bioinformatics/btp157 (2009).
- 24 Hartuv, E. & Shamir, R. A clustering algorithm based on graph connectivity. *Information Processing Letters* **76**, 175-181 (2000).
- 25 Alexa, A., Rahnenfuhrer, J. & Lengauer, T. Improved scoring of functional groups from gene expression data by decorrelating GO graph structure. *Bioinformatics* **22**, 1600-1607, doi:bt1140 [pii]
- 10.1093/bioinformatics/bt1140 (2006).
- 26 Korb, M. *et al.* The Innate Immune Database (IIDB). *BMC Immunol* **9**, 7, doi:1471-2172-9-7 [pii]
- 10.1186/1471-2172-9-7 (2008).
- 27 Pollard, K. S. *et al.* An RNA gene expressed during cortical development evolved rapidly in humans. *Nature* **443**, 167-172, doi:nature05113 [pii]
- 10.1038/nature05113 (2006).
- 28 Washietl, S., Hofacker, I. L. & Stadler, P. F. Fast and reliable prediction of noncoding RNAs. *Proc Natl Acad Sci U S A* **102**, 2454-2459, doi:0409169102 [pii]
- 10.1073/pnas.0409169102 (2005).
- 29 Gruber, A. R., Findeiss, S., Washietl, S., Hofacker, I. L. & Stadler, P. F. Rnaz 2.0: Improved Noncoding Rna Detection. *Pac Symp Biocomput* **15**, 69-79, doi:9789814295291\_0009 [pii] (2010).

- 30 Washietl, S. & Hofacker, I. L. Consensus folding of aligned sequences as a new measure for the detection of functional RNAs by comparative genomics. *J Mol Biol* **342**, 19-30, doi:10.1016/j.jmb.2004.07.018  
S0022-2836(04)00828-9 [pii] (2004).
- 31 Gesell, T. & Washietl, S. Dinucleotide controlled null models for comparative RNA gene prediction. *BMC Bioinformatics* **9**, 248, doi:1471-2105-9-248 [pii]  
10.1186/1471-2105-9-248 (2008).
- 32 Kheradpour, P., Stark, A., Roy, S. & Kellis, M. Reliable prediction of regulator targets using 12 *Drosophila* genomes. *Genome Res* **17**, 1919-1931, doi:gr.7090407 [pii]  
10.1101/gr.7090407 (2007).
- 33 Matys, V. *et al.* TRANSFAC: transcriptional regulation, from patterns to profiles. *Nucleic Acids Res* **31**, 374-378 (2003).
- 34 Sandelin, A., Alkema, W., Engstrom, P., Wasserman, W. W. & Lenhard, B. JASPAR: an open-access database for eukaryotic transcription factor binding profiles. *Nucleic Acids Res* **32**, D91-94, doi:10.1093/nar/gkh012  
32/suppl\_1/D91 [pii] (2004).
- 35 Berger, M. F. *et al.* Compact, universal DNA microarrays to comprehensively determine transcription-factor binding site specificities. *Nat Biotechnol* **24**, 1429-1435, doi:nbt1246 [pii]  
10.1038/nbt1246 (2006).
- 36 Badis, G. *et al.* Diversity and complexity in DNA recognition by transcription factors. *Science* **324**, 1720-1723, doi:1162327 [pii]  
10.1126/science.1162327 (2009).
- 37 Berger, M. F. *et al.* Variation in homeodomain DNA binding revealed by high-resolution analysis of sequence preferences. *Cell* **133**, 1266-1276, doi:S0092-8674(08)00683-1 [pii]  
10.1016/j.cell.2008.05.024 (2008).
- 38 Touzet, H. & Varre, J. S. Efficient and accurate P-value computation for Position Weight Matrices. *Algorithms Mol Biol* **2**, 15, doi:1748-7188-2-15 [pii]  
10.1186/1748-7188-2-15 (2007).
- 39 Hindorff, L. A. *et al.* Potential etiologic and functional implications of genome-wide association loci for human diseases and traits. *Proc Natl Acad Sci U S A* **106**, 9362-9367, doi:0903103106 [pii]  
10.1073/pnas.0903103106 (2009).
- 40 Harrow, J. *et al.* GENCODE: producing a reference annotation for ENCODE. *Genome Biol* **7 Suppl 1**, S4 1-9, doi:gb-2006-7-s1-s4 [pii]  
10.1186/gb-2006-7-s1-s4 (2006).
- 41 Altshuler, D. M. *et al.* Integrating common and rare genetic variation in diverse human populations. *Nature* **467**, 52-58, doi:nature09298 [pii]  
10.1038/nature09298 (2010).
- 42 Masingham, T. & Goldman, N. Detecting amino acid sites under positive selection and purifying selection. *Genetics* **169**, 1753-1762, doi:genetics.104.032144 [pii]  
10.1534/genetics.104.032144 (2005).
- 43 Vilella, A. J. *et al.* EnsemblCompara GeneTrees: Complete, duplication-aware phylogenetic trees in vertebrates. *Genome Res* **19**, 327-335, doi:gr.073585.107 [pii]  
10.1101/gr.073585.107 (2009).
- 44 Hubbard, T. J. *et al.* Ensembl 2007. *Nucleic Acids Res* **35**, D610-617, doi:gkl996 [pii]

- 10.1093/nar/gkl996 (2007).
- 45 Pollard, K. S., Hubisz, M. J., Rosenbloom, K. R. & Siepel, A. Detection of nonneutral substitution rates on mammalian phylogenies. *Genome Res* **20**, 110-121, doi:gr.097857.109 [pii]
- 10.1101/gr.097857.109 (2010).
- 46 Zhang, J., Nielsen, R. & Yang, Z. Evaluation of an improved branch-site likelihood method for detecting positive selection at the molecular level. *Mol Biol Evol* **22**, 2472-2479, doi:msi237 [pii]
- 10.1093/molbev/msi237 (2005).
- 47 Lowe, C. B. & Haussler, D. 29 mammalian genomes reveal novel exaptations of mobile elements for likely regulatory functions in the human genome. *In preparation* (2011).
- 48 Visel, A., Rubin, E. M. & Pennacchio, L. A. Genomic views of distant-acting enhancers. *Nature* **461**, 199-205, doi:nature08451 [pii]
- 10.1038/nature08451 (2009).
- 49 Hubisz, M. J., Pollard, K. S. & Siepel, A. PHAST and RPHAST: phylogenetic analysis with space/time models. *Briefings in Bioinformatics* (2011).
- 50 Benjamini, Y. & Hochberg, Y. Controlling the false discovery rate: a practical and powerful approach to multiple testing. *J R Stat Soc B* **57**, 289-300 (1995).
- 51 Visel, A. *et al.* ChIP-seq accurately predicts tissue-specific activity of enhancers. *Nature* **457**, 854-858, doi:nature07730 [pii]
- 10.1038/nature07730 (2009).
- 52 Heintzman, N. D. *et al.* Histone modifications at human enhancers reflect global cell-type-specific gene expression. *Nature* **459**, 108-112, doi:nature07829 [pii]
- 10.1038/nature07829 (2009).
- 53 Rahmann, S., Muller, T. & Vingron, M. On the power of profiles for transcription factor binding site detection. *Stat Appl Genet Mol Biol* **2**, Article7, doi:10.2202/1544-6115.1032 (2003).



29 Mammals  
Table S1

Table S1. Information on the 29 mammalian assemblies

| Common name                        | Scientific name                      | Assembly | Sample source                                                     | Data generation center | GenBank accession number      | Coverage (x-fold) | Total contig length (Gb) | N50 contig (kb) | N50 scaffold (gapped, kb) |
|------------------------------------|--------------------------------------|----------|-------------------------------------------------------------------|------------------------|-------------------------------|-------------------|--------------------------|-----------------|---------------------------|
| Human                              | <i>Homo sapiens</i>                  | hg18     | n/a                                                               | multiple               | NCBI36                        | FINISHED          | 2.83                     | 38,500          | N/A                       |
| Chimpanze                          | <i>Pan troglodytus</i>               | panTro2  | n/a                                                               | multiple               | AADA01000000                  | 6.0               | 2.97                     | 29              | 9,700                     |
| Rhesus Macaque                     | <i>Macaca mulatta</i>                | rheMac2  | n/a                                                               | multiple               | AANU01000000                  | 5.1               | 2.87                     | 26              | 5,870                     |
| Tarsier                            | <i>Tarsier syrichta</i>              | tarSyr1  | Duke University Primate Center                                    | WUSG                   | ABRT000000000                 | 2.1               | 2.77                     | 2.9             | 12                        |
| Mouse Lemur                        | <i>Microcebus murinus</i>            | micMur1  | Caltech                                                           | Broad                  | <a href="#">ABDC01000000</a>  | 1.9               | 1.86                     | 3.5             | 140                       |
| Bushbaby (Northern Greater Galago) | <i>Otolemur garnetti</i>             | otoGar1  | Duke University Primate Center                                    | Broad                  | <a href="#">AAQR01000000</a>  | 1.9               | 1.97                     | 3.1             | 137                       |
| Tree Shrew                         | <i>Tupaia belangeri</i>              | tupBel1  | German Primate Center, Goettingen                                 | Broad                  | <a href="#">AAPY01000000</a>  | 1.9               | 2.14                     | 3               | 124                       |
| Mouse                              | <i>Mus musculus</i>                  | mm9      | n/a                                                               | multiple               | Build 37                      | FINISHED          | 2.72                     | 39,294          | N/A                       |
| Rat                                | <i>Rattus norvegicus</i>             | rn4      | n/a                                                               | BCM                    | <a href="#">Baylor3.4</a>     | 7.3               | 2.49                     | 18,985          | N/A                       |
| Kangaroo Rat                       | <i>Dipodomys ordii</i>               | dipOrd1  | Museum of Vertebrate Zoology, University of California, Berkeley, | BCM                    | <a href="#">ABRO01000000</a>  | 1.8               | 1.84                     | 4.3             | 33                        |
| Guinea Pig                         | <i>Cavia porcellus</i>               | cavPor2  | Covance Research                                                  | Broad                  | <a href="#">AAKN01000000</a>  | 1.9               | 1.95                     | 81              | 28,000                    |
| Squirrel, Thirteen-lined Ground    | <i>Spermophilus tridecemlineatus</i> | speTri1  | National Institute of Neurological Disorders and Stroke           | Broad                  | <a href="#">AAQQ01000000</a>  | 1.9               | 1.91                     | 2.7             | 95                        |
| Rabbit                             | <i>Oryctolagus cuniculus</i>         | oryCun1  | Covance Research                                                  | Broad                  | <a href="#">AAGW02000000</a>  | 2.0               | 2.08                     | 3.3             | 55                        |
| Pika                               | <i>Ochotona princeps</i>             | ochPri2  | New Mexico Museum of Natural History                              | Broad                  | <a href="#">AAYZ01000000</a>  | 1.9               | 1.92                     | 3.3             | 88                        |
| Alpaca                             | <i>Vicugna pacos</i>                 | vicPac1  | Binghamton University                                             | WUSC                   | <a href="#">ABRR01000000</a>  | 2.9               | 1.92                     | 3.9             | 22                        |
| Dolphin, Bottlenosed               | <i>Tursiops truncatus</i>            | turTru1  | Portland State University                                         | BCM                    | <a href="#">ABRN01000000</a>  | 2.8               | 2.30                     | 9.7             | 16                        |
| Cow                                | <i>Bos taurus</i>                    | bosTau4  | n/a                                                               | BCM                    | AAF030000000                  | 5.4               | 2.87                     | 49              | 1920                      |
| Horse                              | <i>Equus caballus</i>                | equCab2  | n/a                                                               | Broad                  | <a href="#">AAWR02000000</a>  | 6.8               | 2.43                     | 112             | 47,000                    |
| Cat, Domestic                      | <i>Felis catus</i>                   | felCat3  | n/a                                                               | Agencourt              | <a href="#">AANG01000000</a>  | 1.9               | 1.64                     | 2.4             | 113                       |
| Dog, Domestic                      | <i>Canis familiaris</i>              | canFam2  | n/a                                                               | Broad                  | <a href="#">AACN01000000</a>  | 7.6               | 2.39                     | 180             | 45,000                    |
| Little Brown Bat (Microbat)        | <i>Myotis lucifugus</i>              | myoLuc1  | Center for Ecology and Conservation Biology, Boston University    | Broad                  | <a href="#">AAPE01000000</a>  | 1.8               | 1.67                     | 3.1             | 93                        |
| Fruit Bat (Megabat, Flying Fox)    | <i>Pteropus vampyrus</i>             | pteVam1  | Lubee Bat Conservancy, Gainesville                                | BCM                    | <a href="#">ABRP01000000</a>  | 2.9               | 1.84                     | 8.5             | 121                       |
| Hedgehog, European                 | <i>Erinaceus europeaus</i>           | eriEur1  | University of East Anglia, Norwich, UK                            | Broad                  | <a href="#">AANN01000000</a>  | 1.9               | 2.13                     | 2.8             | 33                        |
| Shrew, Common                      | <i>Sorex araneus</i>                 | sorAra1  | Cornell University, Ithaca                                        | Broad                  | AALT00000000                  | 1.9               | 1.83                     | 3.2             | 48                        |
| Elephant, African Savannah         | <i>Loxodonta africana</i>            | loxAfr2  | San Diego Zoo's CRES                                              | Broad                  | <a href="#">AAGU02000000</a>  | 1.9               | 2.45                     | 2.9             | 64                        |
| Hyrax, Rock                        | <i>Procavia capensis</i>             | proCap1  | The Dallas Zoo                                                    | BCM                    | <a href="#">ABRQ01000000</a>  | 2.4               | 2.40                     | 3.4             | 24                        |
| Tenrec                             | <i>Echinops telfari</i>              | echTel1  | Institute of Anatomy, University of Munich, Germany               | Broad                  | <a href="#">AAIY01000000</a>  | 1.9               | 2.11                     | 3.1             | 48                        |
| Nine-banded Armadillo              | <i>Dasypus novemcinctus</i>          | dasNov2  | School of Veterinary Medicine, Louisiana State University         | Broad                  | <a href="#">AAGV020000000</a> | 2.3               | 2.37                     | 2.4             | 55                        |
| Sloth, Two-toed                    | <i>Choloepus hoffmanni</i>           | choHof1  | San Diego Zoo's CRES                                              | WUSG                   | <a href="#">ABVD01000000</a>  | 2.2               | 2.06                     | 2.3             | 10                        |

**Table S2. Constraint estimation and detection statistics**

| Stat                                   | 29way $\omega$<br>12mers | 29way $\omega$ -lods<br>12mers | 29way $\pi$ -lods<br>12mers |
|----------------------------------------|--------------------------|--------------------------------|-----------------------------|
| #called (kmers) fdr=0.1                | 44,931,962               | <b>81,923,925</b>              | 110,250,366                 |
| frac called (kmers)                    | 1.46%                    | <b>2.66%</b>                   | 3.58%                       |
| # elements                             | 2,759,895                | <b>3,621,583</b>               | 4,463,319                   |
| # bases                                | 80,384,823               | <b>128,766,046</b>             | 165,088,933                 |
| frac. called (bases)                   | 2.61%                    | <b>4.18%</b>                   | 5.36%                       |
| frac. constrained (kmers)              | 5.34%                    | XX                             | 11.99%                      |
| frac. constrained (kmers, chr-shifted) | <b>5.44%</b>             | XX                             | <b>12.33%</b>               |

| Stat                                   | 29way $\omega$<br>12mers<br>(BL-corr.) | 29way $\omega$ -lods<br>12mers<br>(BL-corr.) | 29way $\pi$ -lods<br>12mers<br>(BL-corr.) |
|----------------------------------------|----------------------------------------|----------------------------------------------|-------------------------------------------|
| #called (kmers) fdr=0.1                | 38,744,951                             | 14,409,822                                   | 5,411,300                                 |
| frac called (kmers)                    | 1.26%                                  | 0.47%                                        | 0.18%                                     |
| # elements                             | 2,760,769                              | 1,232,883                                    | 471,773                                   |
| # bases                                | 74,366,747                             | 30,098,017                                   | 11,803,440                                |
| frac. called (bases)                   | 2.41%                                  | 0.98%                                        | 0.38%                                     |
| frac. constrained (kmers)              | 4.18%                                  | XX                                           | 56.33%                                    |
| frac. constrained (kmers, chr-shifted) | 4.22%                                  | XX                                           | 5.63%                                     |

| Stat                                   | HMRD $\omega$<br>12mers | HMRD $\omega$ -lods<br>12mers | HMRD $\pi$ -lods<br>12mers |
|----------------------------------------|-------------------------|-------------------------------|----------------------------|
| #called (kmers) fdr=0.1                | 965,648                 | 12,163,613                    | 21,385,019                 |
| frac called (kmers)                    | 0.03%                   | 0.39%                         | 0.69%                      |
| # elements                             | 295,134                 | 1,583,803                     | 2,546,071                  |
| # bases                                | 4,225,299               | 30,086,694                    | 54,526,055                 |
| frac. called (bases)                   | 0.14%                   | 0.98%                         | 1.77%                      |
| frac. constrained (kmers)              | XX                      | XX                            | 10.40%                     |
| frac. constrained (kmers, chr-shifted) | XX                      | XX                            | 10.52%                     |

| Stat                                   | HMRD $\omega$<br>50mers | HMRD $\omega$ -lods<br>50mers | HMRD $\pi$ -lods<br>50mers |
|----------------------------------------|-------------------------|-------------------------------|----------------------------|
| #called (kmers) fdr=0.1                | 42,521,200              | 68,775,126                    | 82,962,293                 |
| frac called (kmers)                    | 1.38%                   | 2.23%                         | 2.69%                      |
| # elements                             | 789,570                 | 817,021                       | 35,057                     |
| # bases                                | 87,972,128              | 114,540,295                   | 4,646,148                  |
| frac. called (bases)                   | 2.86%                   | 3.72%                         | 0.15%                      |
| frac. constrained (kmers)              | 5.34%                   | XX                            | 11.76%                     |
| frac. constrained (kmers, chr-shifted) | 5.36%                   | XX                            | 11.94%                     |

XX = Unreliable estimate due to noisy curve or lack of distinction from Gaussian

Genome len: 3,080,436,051

**Table S3. Comparison of SiPhy and Phastcons elements to HMRD and vertebrate Siepel elements**

a. Element description

|                                                             | Elements  | Total bases (Mb) | Median element size (bp) | Mean element size (bp) | Maximum element size (bp) | Minimum element size (bp) |
|-------------------------------------------------------------|-----------|------------------|--------------------------|------------------------|---------------------------|---------------------------|
| A. 29 mammals SiPhy-omega (10%FDR)                          | 3,621,583 | 129              | 19                       | 36                     | 4,182                     | 12                        |
| B. 29 mammals SiPhy-omega (5%FDR)                           | 1,985,021 | 69               | 20                       | 35                     | 2,503                     | 12                        |
| C. 29 mammals SiPhy-pi (10%FDR)                             | 4,463,319 | 165              | 18                       | 37                     | 17,137                    | 12                        |
| D. 29 mammals SiPhy-pi (5%FDR)                              | 2,261,877 | 99               | 21                       | 44                     | 5,832                     | 12                        |
| E. 29 mammals Phastcons                                     | 2,040,420 | 112              | 29                       | 55                     | 3,895                     | 1                         |
| F. MRH.D SiPhy - 50 bp                                      | 488,089   | 60               | 89                       | 123                    | 6,275                     | 49                        |
| G. 5 vertebrate Phastcons - syntenic elements (Siepel 2005) | 1,183,203 | 123              | 69                       | 104                    | 4,922                     | 1                         |
| H. Union of HMRD and 5 vertebrates (F + G)                  | 1,188,513 | 137              | 77                       | 115                    | 6,280                     | 1                         |

b. Overlap of sets of elements

|                                                             | A         | B         | C         | D         | E         | F       | G         | H         |
|-------------------------------------------------------------|-----------|-----------|-----------|-----------|-----------|---------|-----------|-----------|
| A. 29 mammals SiPhy-omega (10%FDR)                          | 0         | 1,292,279 | 2,939,856 | 1,924,733 | 2,084,383 | 688,122 | 1,581,042 | 1,666,254 |
| B. 29 mammals SiPhy-omega (5%FDR)                           | 1,958,119 | 0         | 1,904,076 | 1,879,787 | 1,878,647 | 801,002 | 1,452,392 | 1,508,727 |
| C. 29 mammals SiPhy-pi (10%FDR)                             | 2,378,558 | 998,510   | 0         | 1,598,747 | 1,594,852 | 504,997 | 1,347,895 | 1,411,653 |
| D. 29 mammals SiPhy-pi (5%FDR)                              | 1,994,844 | 1,302,081 | 2,198,146 | 0         | 1,646,898 | 582,943 | 1,275,799 | 1,333,626 |
| E. 29 mammals Phastcons                                     | 1,739,288 | 1,161,052 | 1,668,545 | 1,391,162 | 0         | 570,218 | 1,151,100 | 1,200,484 |
| F. MRH.D SiPhy - 50 bp                                      | 421,408   | 384,403   | 411,641   | 403,453   | 426,654   | 0       | 421,603   | 488,089   |
| G. 5 vertebrate Phastcons - syntenic elements (Siepel 2005) | 850,816   | 657,568   | 869,285   | 739,129   | 806,837   | 415,833 | 0         | 1,183,203 |
| H. Union of HMRD and 5 vertebrates (F + G)                  | 819,674   | 623,443   | 837,631   | 703,506   | 778,697   | 421,163 | 1,122,066 | 0         |

c. Intersection between sets in basepairs

|                                                             | A           | B          | C           | D          | E          | F          | G           | H           |
|-------------------------------------------------------------|-------------|------------|-------------|------------|------------|------------|-------------|-------------|
| A. 29 mammals SiPhy-omega (10%FDR)                          | 0           | 67,627,303 | 113,238,367 | 89,400,914 | 92,714,916 | 44,242,045 | 78,301,827  | 82,952,319  |
| B. 29 mammals SiPhy-omega (5%FDR)                           | 67,627,303  | 0          | 65,981,370  | 66,004,495 | 64,535,015 | 35,334,387 | 54,961,790  | 57,415,163  |
| C. 29 mammals SiPhy-pi (10%FDR)                             | 113,238,367 | 65,981,370 | 0           | 95,843,873 | 89,646,311 | 46,473,954 | 83,096,502  | 89,168,007  |
| D. 29 mammals SiPhy-pi (5%FDR)                              | 89,400,914  | 66,004,495 | 95,843,873  | 0          | 76,958,066 | 43,091,056 | 68,617,675  | 73,290,379  |
| E. 29 mammals Phastcons                                     | 92,714,916  | 64,535,015 | 89,646,311  | 76,958,066 | 0          | 43,205,177 | 75,124,448  | 79,480,139  |
| F. MRH.D SiPhy - 50 bp                                      | 44,242,045  | 35,334,387 | 46,473,954  | 43,091,056 | 43,205,177 | 0          | 45,823,368  | 59,825,356  |
| G. 5 vertebrate Phastcons - syntenic elements (Siepel 2005) | 78,301,827  | 54,961,790 | 83,096,502  | 68,617,675 | 75,124,448 | 45,823,368 | 0           | 122,814,031 |
| H. Union of HMRD and 5 vertebrates (F + G)                  | 82,952,319  | 57,415,163 | 89,168,007  | 73,290,379 | 79,480,139 | 59,825,356 | 122,814,031 | 0           |

**Table S4. Statistics on new exon predictions by CONGO and supporting evidence**

|                                                                                |       |                   |                                                                                                                          |
|--------------------------------------------------------------------------------|-------|-------------------|--------------------------------------------------------------------------------------------------------------------------|
| Total new predictions                                                          | 3789  | 100.00%           | All new predictions, not overlapping protein-coding exons or pseudogenes in Gencode/Ensembl, RefSeq, or UCSC known genes |
| Breakdown by genomic territory:                                                | 1375  | 36.29%            | Intergenic                                                                                                               |
|                                                                                | 728   | 19.21%            | Intron                                                                                                                   |
|                                                                                | 482   | 12.72%            | UTR                                                                                                                      |
|                                                                                | 481   | 12.69%            | NCExon                                                                                                                   |
|                                                                                | 76    | 2.01%             | NCIntron                                                                                                                 |
|                                                                                | 114   | 3.01%             | AntisenseCDS                                                                                                             |
|                                                                                | 313   | 8.26%             | AntisenseIntron                                                                                                          |
|                                                                                | 103   | 2.72%             | AntisenseUTR                                                                                                             |
|                                                                                | 45    | 1.19%             | AntisenseNCExon                                                                                                          |
| 71                                                                             | 1.87% | AntisenseNCIntron |                                                                                                                          |
| Predictions supported by different lines of evidence (not mutually exclusive): |       |                   |                                                                                                                          |
|                                                                                | 394   | 10.40%            | Pfam domain                                                                                                              |
|                                                                                | 895   | 23.62%            | Mrna (cDNA)                                                                                                              |
|                                                                                | 1318  | 34.78%            | IntronEst                                                                                                                |
|                                                                                | 1640  | 43.28%            | Scripture transcripts (Illumina human body map)                                                                          |

Table S5. Predicted new protein-coding exons by CONGO

| id                          | chrom | start    | end      | strand | phase | length | nt      | CONGO score     | territory | seqdup | Pfam domains | mrna | IntronEst | ScriptureTU | ScriptureLinkage | ScriptureLinkageTo |                 |
|-----------------------------|-------|----------|----------|--------|-------|--------|---------|-----------------|-----------|--------|--------------|------|-----------|-------------|------------------|--------------------|-----------------|
| CONGO_chr1_000849675_517_p0 | chr1  | 849675   | 850191   | +      | 0     | 517    | 1048.16 | UTR             |           |        | SAND         |      | 1         | TU689       | SpliceToPCG      | ENSG00000187634    |                 |
| CONGO_chr1_000906021_252_m0 | chr1  | 906021   | 906272   | -      | 0     | 252    | 512.23  | Intron          |           |        |              |      |           | TU690       | SpliceToPCG      | ENSG00000187642    |                 |
| CONGO_chr1_000959799_148_p0 | chr1  | 959799   | 959946   | +      | 0     | 148    | 704.49  | NCExon          |           |        |              |      | 1         | TU691       | SpliceToPCG      | ENSG00000188157    |                 |
| CONGO_chr1_002351817_112_p0 | chr1  | 2351817  | 2351928  | +      | 0     | 112    | 56.39   | NCExon          |           |        |              |      | 1         | TU694       | SpliceToPCG      | ENSG00000149527    |                 |
| CONGO_chr1_002706469_119_m1 | chr1  | 2706469  | 2706587  | -      | 1     | 119    | 550.24  | Intergenic      |           |        |              |      |           |             |                  |                    |                 |
| CONGO_chr1_002706737_513_m0 | chr1  | 2706737  | 2707249  | -      | 0     | 513    | 2692.97 | Intergenic      |           |        |              |      |           |             |                  |                    |                 |
| CONGO_chr1_006048712_212_p0 | chr1  | 6048712  | 6048923  | +      | 0     | 212    | 1139.1  | Intron          |           |        |              |      |           |             |                  |                    |                 |
| CONGO_chr1_006437081_645_p0 | chr1  | 6437081  | 6437275  | +      | 0     | 645    | 2611.29 | Intron          |           |        |              |      |           |             |                  |                    |                 |
| CONGO_chr1_006437885_960_p0 | chr1  | 6437885  | 6438844  | +      | 0     | 960    | 3025.77 | Intron          |           |        |              |      |           |             |                  |                    |                 |
| CONGO_chr1_006488673_133_m0 | chr1  | 6488673  | 6488805  | -      | 0     | 133    | 663.25  | Intron          |           |        |              |      |           |             |                  |                    |                 |
| CONGO_chr1_007743350_179_p0 | chr1  | 7743350  | 7743428  | +      | 0     | 179    | 5.26    | Intron          |           |        |              |      |           | TU695       | SpliceToPCG      | ENSG00000049245    |                 |
| CONGO_chr1_008596809_126_p1 | chr1  | 8596809  | 8597034  | +      | 1     | 126    | 132.74  | AntisenseIntron |           |        |              |      |           |             |                  |                    |                 |
| CONGO_chr1_008853471_59_m2  | chr1  | 8853471  | 8853529  | -      | 2     | 59     | 464.44  | UTR             |           |        |              |      | 1         | TU696       | SpliceToPCG      | ENSG00000074800    |                 |
| CONGO_chr1_009933876_67_m0  | chr1  | 9933876  | 9933942  | -      | 0     | 67     | 469.19  | AntisenseIntron |           |        |              |      |           |             |                  |                    |                 |
| CONGO_chr1_009935031_84_m2  | chr1  | 9935031  | 9935114  | -      | 2     | 84     | 407.43  | AntisenseIntron |           |        |              |      |           |             |                  |                    |                 |
| CONGO_chr1_009938466_80_m1  | chr1  | 9938466  | 9938545  | -      | 1     | 80     | 394.73  | AntisenseIntron |           |        |              |      |           | TU697       | NovelMultiExon   |                    |                 |
| CONGO_chr1_009943359_74_m0  | chr1  | 9943359  | 9943432  | -      | 0     | 74     | 263.51  | AntisenseIntron |           |        |              |      |           |             |                  |                    |                 |
| CONGO_chr1_010089867_153_p1 | chr1  | 10089867 | 10090019 | +      | 1     | 153    | 100.13  | NCExon          |           |        |              |      | 1         | TU698       | SpliceToPCG      | ENSG00000130939    |                 |
| CONGO_chr1_010326735_201_p2 | chr1  | 10326735 | 10326935 | +      | 2     | 201    | 326.92  | Intron          |           |        |              |      |           |             |                  |                    |                 |
| CONGO_chr1_010624667_223_m0 | chr1  | 10624667 | 10624889 | -      | 0     | 223    | 111.23  | Intron          |           |        |              |      |           | TU699       | SpliceToPCG      | ENSG00000130940    |                 |
| CONGO_chr1_010703959_110_m2 | chr1  | 10703959 | 10704068 | -      | 2     | 110    | 34.12   | Intron          |           |        |              |      |           |             |                  |                    |                 |
| CONGO_chr1_010928863_172_m1 | chr1  | 10928863 | 10929034 | -      | 1     | 172    | 1.34    | Intergenic      |           |        |              |      |           |             |                  |                    |                 |
| CONGO_chr1_012938056_264_m1 | chr1  | 12938056 | 12938319 | -      | 1     | 264    | 237.3   | Intron          |           |        |              |      | 1         |             |                  |                    |                 |
| CONGO_chr1_016409222_118_m0 | chr1  | 16409222 | 16409339 | -      | 0     | 118    | 191.28  | Intron          |           |        |              |      |           |             |                  |                    |                 |
| CONGO_chr1_021746484_119_p0 | chr1  | 21746484 | 21746602 | +      | 0     | 119    | 501.95  | Intron          |           |        |              |      |           |             |                  |                    |                 |
| CONGO_chr1_022067965_84_m0  | chr1  | 22067965 | 22068048 | -      | 0     | 84     | 243.46  | Intron          |           |        |              |      |           | TU124       | SpliceToPCG      | ENSG00000142798    |                 |
| CONGO_chr1_022068546_198_m0 | chr1  | 22068546 | 22068743 | -      | 0     | 198    | 285.39  | Intron          |           |        |              |      |           | TU124       | SpliceToPCG      | ENSG00000142798    |                 |
| CONGO_chr1_022069914_39_m0  | chr1  | 22069914 | 22069952 | -      | 0     | 39     | 25.31   | Intron          |           |        |              |      |           | TU124       | SpliceToPCG      | ENSG00000142798    |                 |
| CONGO_chr1_022149815_165_m0 | chr1  | 22149815 | 22149979 | -      | 0     | 165    | 748.93  | Intergenic      |           |        |              |      |           |             |                  |                    |                 |
| CONGO_chr1_022150126_154_m0 | chr1  | 22150126 | 22150279 | -      | 0     | 154    | 51.12   | Intergenic      |           |        |              |      |           |             |                  |                    |                 |
| CONGO_chr1_022150402_125_m0 | chr1  | 22150402 | 22150526 | -      | 0     | 125    | 105.62  | Intergenic      |           |        |              |      |           |             |                  |                    |                 |
| CONGO_chr1_023293410_51_m1  | chr1  | 23293410 | 23293460 | -      | 1     | 51     | 32.32   | UTR             |           |        |              |      | 1         | TU700       | SpliceToPCG      | ENSG00000169641    |                 |
| CONGO_chr1_024160045_167_p0 | chr1  | 24160045 | 24160211 | +      | 0     | 167    | 122.13  | UTR             |           |        |              |      | 1         | TU701       | SpliceToPCG      | ENSG00000189266    |                 |
| CONGO_chr1_026363239_295_m1 | chr1  | 26363239 | 26363533 | -      | 1     | 295    | 891.37  | Intergenic      |           |        |              |      |           |             |                  |                    |                 |
| CONGO_chr1_026364904_98_m0  | chr1  | 26364904 | 26365001 | -      | 0     | 98     | 452.66  | Intergenic      |           |        |              |      |           |             |                  |                    |                 |
| CONGO_chr1_026365113_84_m0  | chr1  | 26365113 | 26365196 | -      | 0     | 84     | 382.41  | Intergenic      |           |        |              |      |           |             |                  |                    |                 |
| CONGO_chr1_026367494_86_m2  | chr1  | 26367494 | 26367579 | -      | 2     | 86     | 352.18  | Intergenic      |           |        |              |      |           |             |                  |                    |                 |
| CONGO_chr1_026370267_147_m0 | chr1  | 26370267 | 26370413 | -      | 0     | 147    | 737.94  | AntisenseUTR    |           |        |              |      |           |             |                  |                    |                 |
| CONGO_chr1_026370695_45_m0  | chr1  | 26370695 | 26370739 | -      | 0     | 45     | 175.02  | AntisenseUTR    |           |        |              |      |           |             |                  |                    |                 |
| CONGO_chr1_026553738_126_m0 | chr1  | 26553738 | 26553863 | -      | 0     | 126    | 15.66   | Intergenic      |           |        |              |      |           |             |                  |                    |                 |
| CONGO_chr1_026555537_64_m1  | chr1  | 26555537 | 26555600 | -      | 1     | 64     | 62.88   | Intergenic      |           |        |              |      |           |             |                  |                    |                 |
| CONGO_chr1_026671455_115_p1 | chr1  | 26671455 | 26671569 | +      | 1     | 115    | 32.19   | UTR             |           |        |              |      |           |             |                  |                    |                 |
| CONGO_chr1_026922591_97_m2  | chr1  | 26922591 | 26922687 | -      | 2     | 97     | 55.5    | AntisenseIntron |           |        |              |      |           | 1           | TU702            | SpliceToPCG        | ENSG00000198830 |
| CONGO_chr1_027050207_42_m0  | chr1  | 27050207 | 27050248 | -      | 0     | 42     | 51.02   | AntisenseCDS    |           |        |              |      |           |             |                  |                    |                 |
| CONGO_chr1_027770933_92_m2  | chr1  | 27770933 | 27771024 | -      | 2     | 92     | 63.34   | Intron          |           |        |              |      |           | TU703       | SpliceToPCG      | ENSG00000126705    |                 |
| CONGO_chr1_027824198_52_m1  | chr1  | 27824198 | 27824249 | -      | 1     | 52     | 3.73    | UTR             |           |        |              |      |           | 1           | TU704            | SpliceToPCG        | ENSG00000000938 |
| CONGO_chr1_028791611_233_p0 | chr1  | 28791611 | 28791843 | +      | 0     | 233    | 886.32  | UTR             |           |        | Ras          |      |           | 1           | TU705            | SpliceToPCG        | ENSG00000188060 |
| CONGO_chr1_028823045_72_m0  | chr1  | 28823045 | 28823116 | -      | 0     | 72     | 132.53  | NCExon          |           |        |              |      |           | 1           | TU706            | SpliceToPCG        | ENSG00000120656 |
| CONGO_chr1_029086139_171_p0 | chr1  | 29086139 | 29086309 | +      | 0     | 171    | 71.17   | UTR             |           |        |              |      |           | 1           | TU125            | SpliceToPCG        | ENSG00000159023 |
| CONGO_chr1_029267832_51_p0  | chr1  | 29267832 | 29267882 | +      | 0     | 51     | 30.96   | Intron          |           |        |              |      |           | TU125       | SpliceToPCG      | ENSG00000159023    |                 |
| CONGO_chr1_029268265_129_p0 | chr1  | 29268265 | 29268393 | +      | 0     | 129    | 463.29  | Intron          |           |        |              |      |           | TU125       | SpliceToPCG      | ENSG00000159023    |                 |
| CONGO_chr1_029269571_144_p0 | chr1  | 29269571 | 29269714 | +      | 0     | 144    | 102.51  | Intron          |           |        |              |      |           |             |                  |                    |                 |
| CONGO_chr1_029365874_92_m1  | chr1  | 29365874 | 29365965 | -      | 1     | 92     | 107.11  | NCExon          |           |        |              |      |           | 1           | TU707            | SpliceToPCG        | ENSG00000116350 |
| CONGO_chr1_032157755_92_m0  | chr1  | 32157755 | 32157846 | -      | 0     | 92     | 34.1    | UTR             |           |        |              |      |           | 1           | TU708            | SpliceToPCG        | ENSG00000184007 |
| CONGO_chr1_03282949_60_m0   | chr1  | 3282949  | 3283008  | -      | 0     | 60     | 97.99   | NCIntron        |           |        |              |      |           |             |                  |                    |                 |
| CONGO_chr1_032565594_53_p1  | chr1  | 32565594 | 32565646 | +      | 1     | 53     | 55.09   | NCExon          |           |        |              |      |           | 1           | TU709            | SpliceToPCG        | ENSG00000116478 |
| CONGO_chr1_035422839_65_p1  | chr1  | 35422839 | 35422903 | +      | 1     | 65     | 5.09    | AntisenseIntron |           |        |              |      |           |             |                  |                    |                 |
| CONGO_chr1_035422908_94_m0  | chr1  | 35422908 | 35423001 | -      | 0     | 94     | 200.1   | Intron          |           |        |              |      |           |             |                  |                    |                 |
| CONGO_chr1_036323353_115_m1 | chr1  | 36323353 | 36323467 | -      | 1     | 115    | 965     | AntisenseCDS    |           |        |              |      |           |             |                  |                    |                 |
| CONGO_chr1_036532238_84_p1  | chr1  | 36532238 | 36532321 | +      | 1     | 84     | 46.39   | NCExon          |           |        |              |      |           | TU712       | SpliceToPCG      | ENSG000000054118   |                 |
| CONGO_chr1_037216344_96_p2  | chr1  | 37216344 | 37216439 | +      | 2     | 96     | 59.27   | AntisenseIntron |           |        |              |      |           |             |                  |                    |                 |
| CONGO_chr1_037479084_87_p0  | chr1  | 37479084 | 37479170 | +      | 0     | 87     | 36.33   | Intergenic      |           |        |              |      |           |             |                  |                    |                 |
| CONGO_chr1_038509057_81_m0  | chr1  | 38509057 | 38509137 | -      | 0     | 81     | 8.95    | Intergenic      |           |        |              |      |           |             |                  |                    |                 |
| CONGO_chr1_038619746_54_m2  | chr1  | 38619746 | 38619799 | -      | 2     | 54     | 66.46   | Intergenic      |           |        |              |      |           |             |                  |                    |                 |
| CONGO_chr1_038785616_97_m1  | chr1  | 38785616 | 38785712 | -      | 1     | 97     | 26.48   | Intergenic      |           |        |              |      |           |             |                  |                    |                 |
| CONGO_chr1_038800099_92_p0  | chr1  | 38800099 | 38800190 | +      | 0     | 92     | 11.71   | Intergenic      |           |        |              |      |           |             |                  |                    |                 |
| CONGO_chr1_039397228_52_p0  | chr1  | 39397228 | 39397279 | +      | 0     | 52     | 204.48  | Intron          |           |        |              |      |           |             |                  |                    |                 |
| CONGO_chr1_039490105_96_p0  | chr1  | 39490105 | 39490200 | +      | 0     | 96     | 75.1    | Intron          |           |        |              |      |           | TU714       | SpliceToPCG      | ENSG00000127603    |                 |
| CONGO_chr1_039507395_115_m2 | chr1  | 39507395 | 39507509 | -      | 2     | 115    | 430.7   | AntisenseCDS    |           |        |              |      |           |             |                  |                    |                 |
| CONGO_chr1_039537191_73_p2  | chr1  | 39537191 | 39537263 | +      | 2     | 73     | 7.64    | Intron          |           |        |              |      |           |             |                  |                    |                 |
| CONGO_chr1_040860353_141_m0 | chr1  | 40860353 | 40860493 | -      | 0     | 141    | 6       | UTR             |           |        |              |      |           |             |                  |                    |                 |
| CONGO_chr1_040947438_31_p2  | chr1  | 40947438 | 40947468 | +      | 2     | 31     | 1.24    | Intron          |           |        |              |      |           |             |                  |                    |                 |
| CONGO_chr1_040947526_137_m2 | chr1  | 40947526 | 40947662 | -      | 2     | 137    | 56.83   | AntisenseUTR    |           |        |              |      |           |             |                  |                    |                 |
| CONGO_chr1_041867007_68_m0  | chr1  | 41867007 | 41867074 | -      | 0     | 68     | 391.27  | UTR             |           |        |              |      |           |             |                  |                    |                 |
| CONGO_chr1_044512393_176_p2 | chr1  | 44512393 | 44512568 | +      | 2     | 176    | 38.82   | AntisenseIntron |           |        |              |      |           |             |                  |                    |                 |
| CONGO_chr1_044762974_108_p0 | chr1  | 44762974 | 44763081 | +      | 0     | 108    | 19.53   | Intron          |           |        |              |      |           |             |                  |                    |                 |
| CONGO_chr1_046771316_478_m1 | chr1  | 46771316 | 467      |        |       |        |         |                 |           |        |              |      |           |             |                  |                    |                 |















|                              |       |          |          |   |   |     |         |              |  |  |   |       |             |                       |                 |                 |
|------------------------------|-------|----------|----------|---|---|-----|---------|--------------|--|--|---|-------|-------------|-----------------------|-----------------|-----------------|
| CONGO_chr12_022559160_65_m1  | chr12 | 22559160 | 22559224 | - | 1 | 65  | 12.07   | Intron       |  |  |   | TU442 | SpliceToPCG | ENSG00000111731       |                 |                 |
| CONGO_chr12_024125654_75_m0  | chr12 | 24125654 | 24125728 | - | 0 | 75  | 54.83   | Intron       |  |  |   |       |             |                       |                 |                 |
| CONGO_chr12_024372630_75_m0  | chr12 | 24372630 | 24372704 | - | 0 | 75  | 48.99   | Intron       |  |  |   |       |             |                       |                 |                 |
| CONGO_chr12_024804615_63_m0  | chr12 | 24804615 | 24804677 | - | 0 | 63  | 32.14   | Intergenic   |  |  |   |       |             |                       |                 |                 |
| CONGO_chr12_025048570_150_p0 | chr12 | 25048570 | 25048719 | + | 0 | 150 | 234.43  | Intergenic   |  |  |   |       |             |                       |                 |                 |
| CONGO_chr12_025061335_159_p1 | chr12 | 25061335 | 25061493 | + | 1 | 159 | 552.9   | Intergenic   |  |  |   | 1     |             |                       |                 |                 |
| CONGO_chr12_025074479_57_p0  | chr12 | 25074479 | 25074535 | + | 0 | 57  | 171.14  | Intergenic   |  |  |   |       |             |                       |                 |                 |
| CONGO_chr12_025076506_65_p0  | chr12 | 25076506 | 25076570 | + | 0 | 65  | 69.1    | Intergenic   |  |  |   |       |             |                       |                 |                 |
| CONGO_chr12_025078049_100_p1 | chr12 | 25078049 | 25078148 | + | 1 | 100 | 18.92   | Intergenic   |  |  |   |       |             |                       |                 |                 |
| CONGO_chr12_025097062_96_p2  | chr12 | 25097062 | 25097157 | + | 2 | 96  | 31.46   | UTR          |  |  | 1 | 1     | TU443       | SpliceToPCG           | ENSG00000118308 |                 |
| CONGO_chr12_029827650_321_m1 | chr12 | 29827650 | 29827970 | + | 1 | 321 | 110.16  | Intron       |  |  | 1 | 1     | TU444       | SpliceToPCG           | ENSG00000133687 |                 |
| CONGO_chr12_030350265_91_p0  | chr12 | 30350265 | 30350355 | + | 0 | 91  | 388.79  | Intergenic   |  |  |   |       |             |                       |                 |                 |
| CONGO_chr12_031081488_159_m0 | chr12 | 31081488 | 31081646 | + | 0 | 159 | 161.91  | NCIntron     |  |  |   |       |             |                       |                 |                 |
| CONGO_chr12_032483995_107_p0 | chr12 | 32483995 | 32484098 | + | 0 | 104 | 54.76   | Intergenic   |  |  |   | 1     |             |                       |                 |                 |
| CONGO_chr12_032608390_101_p1 | chr12 | 32608390 | 32608490 | + | 0 | 101 | 29.88   | UTR          |  |  |   | 1     | TU445       | SpliceToPCG           | ENSG00000139132 |                 |
| CONGO_chr12_046470256_170_m1 | chr12 | 46470256 | 46470245 | + | 1 | 170 | 30.9    | NCExon       |  |  | 1 | 1     | TU446       | SpliceToPCG           | ENSG00000061273 |                 |
| CONGO_chr12_047035877_141_m1 | chr12 | 47035877 | 47036017 | + | 1 | 141 | 207.81  | Intergenic   |  |  |   |       |             |                       |                 |                 |
| CONGO_chr12_047036542_96_m0  | chr12 | 47036542 | 47036637 | + | 0 | 96  | 75.03   | Intergenic   |  |  |   |       |             |                       |                 |                 |
| CONGO_chr12_047065476_200_m2 | chr12 | 47065476 | 47065675 | + | 2 | 200 | 202.03  | Intergenic   |  |  |   |       |             |                       |                 |                 |
| CONGO_chr12_047065908_171_m0 | chr12 | 47065908 | 47066078 | + | 0 | 171 | 34.08   | Intergenic   |  |  |   |       |             |                       |                 |                 |
| CONGO_chr12_047396728_55_p1  | chr12 | 47396728 | 47396782 | + | 1 | 55  | 180.65  | AntisenseUTR |  |  |   |       | TU447       | NovelMultiExon        |                 |                 |
| CONGO_chr12_047667083_94_p1  | chr12 | 47667083 | 47667176 | + | 1 | 94  | 29.3    | Intergenic   |  |  |   |       |             |                       |                 |                 |
| CONGO_chr12_048246790_102_m0 | chr12 | 48246790 | 48246891 | + | 0 | 102 | 92.3    | UTR          |  |  | 1 | 1     | TU448       | SpliceToPCG           | ENSG00000187778 |                 |
| CONGO_chr12_048338301_85_m0  | chr12 | 48338301 | 48338385 | + | 0 | 85  | 88.82   | Intron       |  |  |   |       | TU449       | SpliceToPCG           | ENSG00000161791 |                 |
| CONGO_chr12_048753635_301_p0 | chr12 | 48753635 | 48753935 | + | 0 | 301 | 622.65  | Intron       |  |  |   |       |             |                       |                 |                 |
| CONGO_chr12_048753953_342_p0 | chr12 | 48753953 | 48754294 | + | 0 | 342 | 236.15  | Intron       |  |  |   |       |             |                       |                 |                 |
| CONGO_chr12_049877820_254_m2 | chr12 | 49877820 | 49878073 | + | 2 | 254 | 186.24  | UTR          |  |  | 1 | 1     | TU45        | SpliceToPCG           | ENSG00000170545 |                 |
| CONGO_chr12_049878600_226_m0 | chr12 | 49878600 | 49878825 | + | 0 | 226 | 610.19  | UTR          |  |  | 1 | 1     | TU45        | SpliceToPCG           | ENSG00000170545 |                 |
| CONGO_chr12_049879797_135_m0 | chr12 | 49879797 | 49879931 | + | 0 | 135 | 769.35  | UTR          |  |  | 1 | 1     | TU45        | SpliceToPCG           | ENSG00000170545 |                 |
| CONGO_chr12_049884223_196_m0 | chr12 | 49884223 | 49884418 | + | 0 | 196 | 1051.32 | UTR          |  |  | 1 | 1     | TU45        | SpliceToPCG           | ENSG00000170545 |                 |
| CONGO_chr12_049886840_48_m0  | chr12 | 49886840 | 49886887 | + | 0 | 48  | 243     | UTR          |  |  | 1 | 1     | TU45        | SpliceToPCG           | ENSG00000170545 |                 |
| CONGO_chr12_050494264_681_m0 | chr12 | 50494264 | 50494444 | + | 0 | 681 | 943.99  | Intergenic   |  |  |   |       |             |                       |                 |                 |
| CONGO_chr12_050946597_152_p0 | chr12 | 50946597 | 50946798 | + | 0 | 152 | 138.78  | Intergenic   |  |  |   |       |             |                       |                 |                 |
| CONGO_chr12_050947014_117_p0 | chr12 | 50947014 | 50947130 | + | 0 | 117 | 46.56   | Intergenic   |  |  |   |       |             |                       |                 |                 |
| CONGO_chr12_050947396_197_p0 | chr12 | 50947396 | 50947592 | + | 0 | 197 | 141.3   | Intergenic   |  |  |   |       |             |                       |                 |                 |
| CONGO_chr12_050955872_105_p0 | chr12 | 50955872 | 50955974 | + | 0 | 105 | 420.33  | UTR          |  |  |   | 1     | TU450       | SpliceToPCG           | ENSG00000170442 |                 |
| CONGO_chr12_051021373_295_p1 | chr12 | 51021373 | 51021667 | + | 1 | 295 | 914.71  | Intergenic   |  |  |   |       |             |                       |                 |                 |
| CONGO_chr12_051024272_209_p0 | chr12 | 51024272 | 51024480 | + | 0 | 209 | 489.46  | Intergenic   |  |  |   |       |             |                       |                 |                 |
| CONGO_chr12_051026223_61_p1  | chr12 | 51026223 | 51026283 | + | 1 | 61  | 494.58  | Intergenic   |  |  |   |       |             |                       |                 |                 |
| CONGO_chr12_051027314_45_p0  | chr12 | 51027314 | 51027358 | + | 0 | 45  | 97.12   | Intergenic   |  |  |   |       |             |                       |                 |                 |
| CONGO_chr12_051028052_87_p0  | chr12 | 51028052 | 51028138 | + | 0 | 87  | 347.69  | Intergenic   |  |  |   |       |             |                       |                 |                 |
| CONGO_chr12_051028156_45_m0  | chr12 | 51028156 | 51028200 | + | 0 | 45  | 18.01   | Intergenic   |  |  |   | 1     |             |                       |                 |                 |
| CONGO_chr12_051028438_126_p0 | chr12 | 51028438 | 51028563 | + | 0 | 126 | 14.96   | Intergenic   |  |  |   |       |             |                       |                 |                 |
| CONGO_chr12_051030164_221_p0 | chr12 | 51030164 | 51030384 | + | 0 | 221 | 1312.66 | Intergenic   |  |  |   |       |             |                       |                 |                 |
| CONGO_chr12_051033172_32_p1  | chr12 | 51033172 | 51033203 | + | 1 | 32  | 261.82  | Intergenic   |  |  |   |       |             |                       |                 |                 |
| CONGO_chr12_051091804_186_m2 | chr12 | 51091804 | 51091989 | + | 2 | 186 | 172.87  | Intergenic   |  |  |   |       |             |                       |                 |                 |
| CONGO_chr12_051094012_152_m0 | chr12 | 51094012 | 51094163 | + | 0 | 152 | 541.77  | Intergenic   |  |  |   |       | TU451       | SpliceToPCG           | ENSG00000170421 |                 |
| CONGO_chr12_051096025_143_m0 | chr12 | 51096025 | 51096167 | + | 0 | 143 | 342.04  | Intergenic   |  |  |   |       |             |                       |                 |                 |
| CONGO_chr12_051098402_78_m0  | chr12 | 51098402 | 51098479 | + | 0 | 78  | 8.32    | Intergenic   |  |  |   | 1     |             |                       |                 |                 |
| CONGO_chr12_051101710_209_m0 | chr12 | 51101710 | 51101918 | + | 0 | 209 | 581.48  | Intergenic   |  |  |   |       |             |                       |                 |                 |
| CONGO_chr12_051313513_74_m0  | chr12 | 51313513 | 51313586 | + | 0 | 74  | 7.01    | Intergenic   |  |  |   |       |             |                       |                 |                 |
| CONGO_chr12_051395628_161_m0 | chr12 | 51395628 | 51395788 | + | 0 | 161 | 520.56  | Intergenic   |  |  |   |       |             |                       |                 |                 |
| CONGO_chr12_051396516_126_m0 | chr12 | 51396516 | 51396641 | + | 0 | 126 | 406.56  | Intergenic   |  |  |   |       |             |                       |                 |                 |
| CONGO_chr12_051397787_84_m0  | chr12 | 51397787 | 51397870 | + | 0 | 84  | 133.36  | Intergenic   |  |  |   |       |             |                       |                 |                 |
| CONGO_chr12_051398219_100_m0 | chr12 | 51398219 | 51398318 | + | 0 | 100 | 75.15   | Intergenic   |  |  |   |       |             |                       |                 |                 |
| CONGO_chr12_051399020_61_m1  | chr12 | 51399020 | 51399080 | + | 1 | 61  | 417.62  | Intergenic   |  |  |   |       |             |                       |                 |                 |
| CONGO_chr12_051401216_291_m0 | chr12 | 51401216 | 51401506 | + | 0 | 291 | 44.18   | Intergenic   |  |  |   | 1     |             |                       |                 |                 |
| CONGO_chr12_051428282_83_m2  | chr12 | 51428282 | 51428364 | + | 2 | 83  | 1.42    | Intergenic   |  |  |   |       |             |                       |                 |                 |
| CONGO_chr12_051433360_152_m0 | chr12 | 51433360 | 51433511 | + | 0 | 152 | 295.53  | Intergenic   |  |  |   |       |             |                       |                 |                 |
| CONGO_chr12_051724637_75_p0  | chr12 | 51724637 | 51724711 | + | 0 | 75  | 160.67  | AntisenseUTR |  |  |   |       |             |                       |                 |                 |
| CONGO_chr12_051921974_277_p0 | chr12 | 51921974 | 51922250 | + | 0 | 277 | 423.03  | Intergenic   |  |  |   |       |             |                       | NovelUnspliced  |                 |
| CONGO_chr12_052132158_270_p2 | chr12 | 52132158 | 52132427 | + | 2 | 270 | 64.29   | UTR          |  |  |   | 1     | 1           | TU184                 | SpliceToPCG     | ENSG00000197111 |
| CONGO_chr12_052154920_349_p1 | chr12 | 52154920 | 52155268 | + | 1 | 349 | 369.52  | Intron       |  |  |   | 1     | 1           | TU184                 | SpliceToPCG     | ENSG00000197111 |
| CONGO_chr12_052696814_142_p2 | chr12 | 52696814 | 52696955 | + | 2 | 142 | 66.26   | UTR          |  |  |   |       | TU185       | SpliceToPCG           | ENSG00000172789 |                 |
| CONGO_chr12_052708503_56_p1  | chr12 | 52708503 | 52708558 | + | 1 | 56  | 72.88   | UTR          |  |  |   | 1     | TU185       | SpliceToPCG           | ENSG00000172789 |                 |
| CONGO_chr12_053032379_91_p1  | chr12 | 53032379 | 53032469 | + | 1 | 91  | 59.77   | Intergenic   |  |  |   |       |             |                       |                 |                 |
| CONGO_chr12_053796384_142_p1 | chr12 | 53796384 | 53796525 | + | 1 | 142 | 468.75  | Intergenic   |  |  |   |       |             |                       |                 |                 |
| CONGO_chr12_053874319_234_m0 | chr12 | 53874319 | 53874552 | + | 0 | 234 | 1242.35 | Intergenic   |  |  |   |       |             |                       | 71m_1           |                 |
| CONGO_chr12_053874620_110_m2 | chr12 | 53874620 | 53874729 | + | 2 | 110 | 183.54  | Intergenic   |  |  |   |       |             |                       | 71m_1           |                 |
| CONGO_chr12_053874761_107_m0 | chr12 | 53874761 | 53874867 | + | 0 | 107 | 85.87   | Intergenic   |  |  |   |       |             |                       |                 |                 |
| CONGO_chr12_054022914_408_p2 | chr12 | 54022914 | 54023321 | + | 2 | 408 | 2157.8  | Intergenic   |  |  |   |       |             |                       | 71m_1           |                 |
| CONGO_chr12_054023337_80_p1  | chr12 | 54023337 | 54023416 | + | 1 | 80  | 146.33  | Intergenic   |  |  |   |       |             |                       |                 |                 |
| CONGO_chr12_054023472_351_p2 | chr12 | 54023472 | 54023822 | + | 2 | 351 | 2032.79 | Intergenic   |  |  |   |       |             |                       | 71m_1           |                 |
| CONGO_chr12_054291674_281_p0 | chr12 | 54291674 | 54291954 | + | 0 | 281 | 1016.17 | Intergenic   |  |  |   |       |             |                       | 71m_1           |                 |
| CONGO_chr12_054291998_563_p2 | chr12 | 54291998 | 54292560 | + | 2 | 563 | 2207.98 | Intergenic   |  |  |   |       |             |                       | 71m_1           |                 |
| CONGO_chr12_054431554_33_m0  | chr12 | 54431554 | 54431586 | + | 0 | 33  | 30.85   | AntisenseUTR |  |  |   |       | TU453       | SpliceToPCG           | ENSG00000135392 |                 |
| CONGO_chr12_054698189_40_p0  | chr12 | 54698189 | 54698228 | + | 0 | 40  | 37.03   | Intergenic   |  |  |   | 1     | 1           | TU455                 | SpliceToPCG     | ENSG00000123411 |
| CONGO_chr12_054701432_63_m1  | chr12 | 54701432 | 54701494 | + | 1 | 63  | 182.36  | AntisenseCDS |  |  |   |       |             |                       |                 |                 |
| CONGO_chr12_054701520_133_m2 | chr12 | 54701520 | 54701652 | + | 2 | 133 | 55.7    | AntisenseCDS |  |  |   |       |             |                       |                 |                 |
| CONGO_chr12_054798284_86_p1  | chr12 | 54798284 | 54798369 | + | 1 | 86  | 98.92   | UTR          |  |  |   | 1     | TU187       | SpliceToPCG           | ENSG00000092841 |                 |
| CONGO_chr12_054799139_64_p2  | chr12 | 54799139 | 54799202 | + | 2 | 64  | 105.49  | UTR          |  |  |   | 1     | TU187       | SpliceToPCG           | ENSG00000092841 |                 |
| CONGO_chr12_054919829_86_p2  | chr12 | 54919829 | 54919914 | + | 2 | 86  | 14.63   | AntisenseUTR |  |  |   |       | TU456       | UnsplicedMergeWithPCG | ENSG00000139645 |                 |
| CONGO_chr12_055368185_122_p1 | chr12 | 55368185 | 55368306 | + | 1 | 122 | 151.04  | AntisenseUTR |  |  |   |       |             |                       |                 |                 |
| CONGO_chr12_055663545_114_m1 | chr12 | 55663545 | 55663658 | + | 1 | 114 | 366.79  | Intergenic   |  |  |   |       |             |                       |                 |                 |
| CONGO_chr12_055665733_97_m2  | chr12 | 55665733 | 55665829 | + | 2 | 97  | 5.66    | Intergenic   |  |  |   |       |             |                       |                 |                 |
| CONGO_chr12_055665923_89_m0  | chr12 | 55665923 | 55666011 | + | 0 | 89  | 56.74   | Intergenic   |  |  |   |       |             |                       |                 |                 |
| CONGO_chr12_055848235_51_p2  | chr12 | 55848235 | 55848285 | + | 2 | 51  | 274.36  | NCExon       |  |  |   | 1     | TU457       | SpliceToPCG           | ENSG00000123384 |                 |
| CONGO_chr12_056209294_73_m2  | chr12 | 56209294 | 56209366 | + | 2 | 73  | 115.21  | AntisenseUTR |  |  |   |       | TU458       | SpliceToPCG           | ENSG00000175203 |                 |
| CONGO_chr12_056299620_309_p2 | chr12 | 56299620 | 56299928 | + | 2 | 309 | 573.21  | NCExon       |  |  |   |       | TU459       | SpliceToPCG           | ENSG00000135502 |                 |
| CONGO_chr12_056304781_63_p0  | chr12 | 5630     |          |   |   |     |         |              |  |  |   |       |             |                       |                 |                 |





|                               |       |           |           |   |   |      |         |                   |                 |   |       |                       |                 |
|-------------------------------|-------|-----------|-----------|---|---|------|---------|-------------------|-----------------|---|-------|-----------------------|-----------------|
| CONGO chr14_076561307_91_m1   | chr14 | 76561307  | 76561397  | - | 1 | 91   | 69.7    | UTR               |                 |   |       | UnsplicedMergeWithPCG | ENSG00000119669 |
| CONGO chr14_07779185_314_p2   | chr14 | 77779185  | 77779498  | + | 2 | 314  | 2330.42 | NCExon            | Laminin_G_2     | 1 | TU105 | SpliceToPCG           | ENSG00000021645 |
| CONGO chr14_07779526_373_p0   | chr14 | 77779526  | 77779898  | + | 0 | 373  | 3531.17 | NCExon            | EGF_Laminin_G_2 | 1 | TU105 | SpliceToPCG           | ENSG00000021645 |
| CONGO chr14_078344705_60_m2   | chr14 | 78344705  | 78344764  | - | 2 | 60   | 132.59  | AntisenseIntron   |                 |   |       |                       |                 |
| CONGO chr14_079389635_110_p2  | chr14 | 79389635  | 79389744  | + | 2 | 110  | 222.03  | NCExon            |                 | 1 | TU105 | SpliceToPCG           | ENSG00000021645 |
| CONGO chr14_080804511_84_m0   | chr14 | 80804511  | 80804594  | - | 0 | 84   | 522.82  | Intron            |                 |   | TU521 | SpliceToPCG           | ENSG00000140022 |
| CONGO chr14_090141685_171_m2  | chr14 | 90141685  | 90141855  | - | 2 | 171  | 337.01  | Intron            |                 |   | TU522 | SpliceToPCG           | ENSG00000165914 |
| CONGO chr14_090821767_133_m1  | chr14 | 90821767  | 90821899  | - | 1 | 133  | 176.05  | Intron            |                 |   | TU523 | SpliceToPCG           | ENSG00000015133 |
| CONGO chr14_092966755_243_m0  | chr14 | 92966755  | 92966997  | - | 0 | 243  | 187.27  | AntisenseIntron   |                 |   |       |                       |                 |
| CONGO chr14_093002896_103_p0  | chr14 | 93002896  | 93002998  | + | 0 | 103  | 13.61   | Intron            |                 |   |       |                       |                 |
| CONGO chr14_093156991_150_p2  | chr14 | 93156991  | 93157140  | + | 2 | 150  | 119.54  | Intron            |                 |   | TU524 | SpliceToPCG           | ENSG00000133958 |
| CONGO chr14_093544708_62_p0   | chr14 | 93544708  | 93544769  | + | 0 | 62   | 26.75   | UTR               |                 | 1 | TU525 | SpliceToPCG           | ENSG00000175699 |
| CONGO chr14_093883636_185_m0  | chr14 | 93883636  | 93883820  | - | 0 | 185  | 162.97  | Intergenic        |                 |   |       |                       |                 |
| CONGO chr14_094729409_97_m1   | chr14 | 94729409  | 94729505  | + | 1 | 97   | 4.3     | Intron            |                 |   |       |                       |                 |
| CONGO chr14_095458871_166_p0  | chr14 | 95458871  | 95459056  | + | 0 | 186  | 1914.25 | NCExon            |                 | 1 | TU526 | SpliceToPCG           | ENSG00000165959 |
| CONGO chr14_097109420_144_p0  | chr14 | 97109420  | 97109563  | + | 0 | 144  | 61.88   | Intergenic        |                 |   |       |                       |                 |
| CONGO chr14_097169388_59_p2   | chr14 | 97169388  | 97169445  | + | 2 | 59   | 7.07    | AntisenseUTR      |                 |   |       |                       |                 |
| CONGO chr14_098169608_77_p1   | chr14 | 98169608  | 98169684  | + | 1 | 77   | 48.14   | Intergenic        |                 |   |       |                       |                 |
| CONGO chr14_098346292_100_p2  | chr14 | 98346292  | 98346391  | + | 2 | 100  | 29.42   | Intergenic        |                 |   |       |                       |                 |
| CONGO chr14_099428229_57_p2   | chr14 | 99428229  | 99428285  | + | 2 | 57   | 402.85  | Intron            |                 |   | TU527 | SpliceToPCG           | ENSG00000066629 |
| CONGO chr14_099814047_128_m0  | chr14 | 99814047  | 99814174  | - | 0 | 128  | 9.68    | AntisenseUTR      |                 | 1 | TU528 | SpliceToPCG           | ENSG00000197119 |
| CONGO chr14_100086510_90_m1   | chr14 | 100086510 | 100086599 | - | 1 | 90   | 16.51   | Intron            |                 |   |       |                       |                 |
| CONGO chr14_100113442_332_m1  | chr14 | 100113442 | 100113773 | - | 1 | 332  | 208.79  | Intergenic        |                 |   |       |                       |                 |
| CONGO chr14_102624175_157_p0  | chr14 | 102624175 | 102624331 | + | 0 | 157  | 590.21  | Intergenic        |                 |   | TU529 | NovelMultiExon        |                 |
| CONGO chr14_103476896_298_m1  | chr14 | 103476896 | 103477193 | + | 1 | 298  | 1465.18 | NCExon            |                 | 1 | TU198 | SpliceToPCG           | ENSG00000156411 |
| CONGO chr14_103477487_281_m0  | chr14 | 103477487 | 103477767 | - | 0 | 281  | 1776.66 | NCExon            |                 | 1 | TU198 | SpliceToPCG           | ENSG00000156411 |
| CONGO chr14_103672555_138_p0  | chr14 | 103672555 | 103672692 | + | 0 | 138  | 70.21   | Intergenic        |                 |   |       |                       |                 |
| CONGO chr14_105159294_84_m0   | chr14 | 105159294 | 105159377 | - | 0 | 84   | 114.19  | Intron            |                 | 1 | TU199 | NovelMultiExon        |                 |
| CONGO chr14_105160450_131_m2  | chr14 | 105160450 | 105160580 | - | 2 | 131  | 431.45  | Intron            |                 | 1 | TU199 | NovelMultiExon        |                 |
| CONGO chr14_105178347_84_m0   | chr14 | 105178347 | 105178430 | - | 0 | 84   | 13.58   | NCExon            |                 | 1 | TU200 | NovelMultiExon        |                 |
| CONGO chr14_105179161_131_m2  | chr14 | 105179161 | 105179291 | - | 2 | 131  | 89.81   | NCExon            |                 | 1 | TU200 | NovelMultiExon        |                 |
| CONGO chr15_023124120_92_p2   | chr15 | 23124120  | 23124211  | + | 2 | 92   | 7.72    | NCIntron          |                 |   |       |                       |                 |
| CONGO chr15_026662711_132_p2  | chr15 | 26662711  | 26662842  | + | 2 | 132  | 131.44  | Intergenic        |                 | 1 | TU106 | NovelMultiExon        |                 |
| CONGO chr15_02673453_136_p0   | chr15 | 2673453   | 2673598   | + | 0 | 136  | 215.75  | Intergenic        |                 | 1 | TU106 | NovelMultiExon        |                 |
| CONGO chr15_02676824_171_p2   | chr15 | 2676824   | 2676994   | + | 1 | 171  | 201.81  | Intergenic        | Cyl-b5          | 1 | TU106 | SpliceToPCG           | ENSG00000206149 |
| CONGO chr15_026775918_126_p2  | chr15 | 26775918  | 26776043  | + | 2 | 126  | 189.36  | Intergenic        |                 | 1 | TU107 | SpliceToPCG           | ENSG00000206149 |
| CONGO chr15_026717867_102_p1  | chr15 | 26717867  | 26717968  | + | 1 | 102  | 148.11  | Intron            |                 | 1 | TU107 | SpliceToPCG           | ENSG00000206149 |
| CONGO chr15_026718075_140_p1  | chr15 | 26718075  | 26718214  | + | 1 | 140  | 111.94  | UTR               | ZZ              | 1 | TU107 | SpliceToPCG           | ENSG00000206149 |
| CONGO chr15_028035727_133_m1  | chr15 | 28035727  | 28035859  | - | 1 | 133  | 1555.61 | NCExon            |                 | 1 | TU531 | SpliceToPCG           | ENSG00000104067 |
| CONGO chr15_028152115_97_m0   | chr15 | 28152115  | 28152211  | - | 0 | 97   | 296.33  | NCExon            |                 | 1 |       |                       |                 |
| CONGO chr15_029240401_54_m0   | chr15 | 29240401  | 29240454  | - | 0 | 54   | 406.53  | Intergenic        |                 | 1 |       |                       |                 |
| CONGO chr15_031198742_120_m2  | chr15 | 31198742  | 31198861  | - | 2 | 120  | 146.26  | Intron            |                 |   |       |                       |                 |
| CONGO chr15_033333263_160_p1  | chr15 | 33333263  | 33333422  | + | 1 | 160  | 1.33    | Intergenic        |                 |   |       |                       |                 |
| CONGO chr15_033333721_75_m2   | chr15 | 33333721  | 33333795  | - | 2 | 75   | 30.38   | Intergenic        |                 |   |       |                       |                 |
| CONGO chr15_033645385_147_m0  | chr15 | 33645385  | 33645531  | - | 0 | 147  | 33.87   | AntisenseNCIntron |                 |   |       |                       |                 |
| CONGO chr15_033832569_85_m1   | chr15 | 33832569  | 33832653  | - | 1 | 85   | 28      | AntisenseNCIntron |                 |   |       |                       |                 |
| CONGO chr15_033918414_64_m2   | chr15 | 33918414  | 33918477  | - | 2 | 64   | 8.09    | AntisenseNCIntron |                 |   |       |                       |                 |
| CONGO chr15_034575049_220_m1  | chr15 | 34575049  | 34575268  | - | 1 | 220  | 74.45   | Intergenic        |                 |   |       |                       |                 |
| CONGO chr15_034973571_115_m1  | chr15 | 34973571  | 34973685  | - | 1 | 115  | 11.18   | Intron            |                 |   | TU532 | SpliceToPCG           | ENSG00000134138 |
| CONGO chr15_035028469_68_p1   | chr15 | 35028469  | 35028536  | + | 1 | 68   | 194.81  | AntisenseIntron   |                 |   |       |                       |                 |
| CONGO chr15_035028585_181_m1  | chr15 | 35028585  | 35028765  | + | 1 | 181  | 55.34   | Intron            |                 |   |       |                       |                 |
| CONGO chr15_035028891_108_p0  | chr15 | 35028891  | 35028998  | + | 0 | 108  | 69.59   | AntisenseIntron   |                 |   |       |                       |                 |
| CONGO chr15_035136929_67_p2   | chr15 | 35136929  | 35136995  | + | 2 | 67   | 20.31   | AntisenseIntron   |                 |   |       |                       |                 |
| CONGO chr15_035161635_99_m1   | chr15 | 35161635  | 35161733  | - | 1 | 99   | 106.97  | Intron            |                 |   |       |                       |                 |
| CONGO chr15_035301017_92_p1   | chr15 | 35301017  | 35301108  | + | 1 | 92   | 11.43   | Intergenic        |                 |   |       |                       |                 |
| CONGO chr15_035438962_113_m2  | chr15 | 35438962  | 35439074  | + | 2 | 113  | 15.25   | Intergenic        |                 |   |       |                       |                 |
| CONGO chr15_035441177_147_m0  | chr15 | 35441177  | 35441323  | - | 0 | 147  | 38.3    | Intergenic        |                 |   |       |                       |                 |
| CONGO chr15_035959557_104_m2  | chr15 | 35959557  | 35959660  | + | 2 | 104  | 19.64   | Intergenic        |                 |   |       |                       |                 |
| CONGO chr15_035983897_138_m0  | chr15 | 35983897  | 35984034  | - | 0 | 138  | 4.84    | Intergenic        |                 |   |       |                       |                 |
| CONGO chr15_038403549_462_p0  | chr15 | 38403549  | 38404010  | - | 0 | 462  | 270.58  | NCExon            |                 | 1 | TU533 | NovelMultiExon        |                 |
| CONGO chr15_038992229_61_m2   | chr15 | 38992229  | 38992289  | - | 2 | 61   | 40.42   | Intergenic        |                 |   |       |                       |                 |
| CONGO chr15_039299320_69_m2   | chr15 | 39299320  | 39299388  | - | 2 | 69   | 456.72  | Intron            |                 | 1 | TU201 | SpliceToPCG           | ENSG00000178997 |
| CONGO chr15_039305933_133_m0  | chr15 | 39305933  | 39306065  | - | 0 | 133  | 399.96  | Intron            |                 | 1 | TU201 | SpliceToPCG           | ENSG00000178997 |
| CONGO chr15_040453777_114_p0  | chr15 | 40453777  | 40453890  | - | 0 | 114  | 463.59  | Intron            |                 |   |       |                       |                 |
| CONGO chr15_041648676_150_m0  | chr15 | 41648676  | 41648825  | - | 0 | 150  | 242.66  | NCExon            |                 | 1 |       |                       |                 |
| CONGO chr15_041958989_172_m0  | chr15 | 41958989  | 41959160  | - | 0 | 172  | 758.96  | Intron            |                 |   | TU534 | SpliceToPCG           | ENSG00000171877 |
| CONGO chr15_045444453_40_m0   | chr15 | 45444453  | 45444492  | - | 0 | 40   | 45.02   | AntisenseIntron   |                 |   |       |                       |                 |
| CONGO chr15_046305368_69_p2   | chr15 | 46305368  | 46305436  | + | 2 | 69   | 0.87    | UTR               |                 | 1 | TU535 | SpliceToPCG           | ENSG00000074803 |
| CONGO chr15_048580190_63_m1   | chr15 | 48580190  | 48580252  | - | 1 | 63   | 1.05    | UTR               |                 | 1 | TU537 | SpliceToPCG           | ENSG00000092439 |
| CONGO chr15_050003529_105_m0  | chr15 | 50003529  | 50003633  | - | 0 | 105  | 182.79  | AntisenseNCIntron |                 |   | TU65  | SpliceToPCG           | ENSG00000166477 |
| CONGO chr15_050005234_135_m1  | chr15 | 50005234  | 50005368  | - | 1 | 135  | 771.48  | AntisenseNCIntron | Leo1            |   | TU65  | SpliceToPCG           | ENSG00000166477 |
| CONGO chr15_050006267_95_m0   | chr15 | 50006267  | 50006361  | - | 0 | 95   | 414.95  | AntisenseNCIntron | Leo1            |   | TU65  | SpliceToPCG           | ENSG00000166477 |
| CONGO chr15_050008822_146_m0  | chr15 | 50008822  | 50008967  | - | 0 | 146  | 11.78   | AntisenseNCExon   |                 |   | TU65  | SpliceToPCG           | ENSG00000166477 |
| CONGO chr15_050125319_70_p1   | chr15 | 50125319  | 50125388  | + | 1 | 70   | 141.78  | UTR               |                 | 1 | TU538 | SpliceToPCG           | ENSG00000069956 |
| CONGO chr15_051056351_63_p0   | chr15 | 51056351  | 51056413  | - | 0 | 63   | 27.49   | Intergenic        |                 |   |       |                       |                 |
| CONGO chr15_053397118_165_m0  | chr15 | 53397118  | 53397282  | - | 0 | 165  | 151.15  | NCExon            |                 | 1 | TU539 | SpliceToPCG           | ENSG00000069974 |
| CONGO chr15_053699351_136_m1  | chr15 | 53699351  | 53699486  | - | 1 | 136  | 169.14  | UTR               |                 | 1 | TU540 | SpliceToPCG           | ENSG00000166450 |
| CONGO chr15_055820716_111_m0  | chr15 | 55820716  | 55820826  | - | 0 | 111  | 4.75    | AntisenseNCIntron |                 |   |       |                       |                 |
| CONGO chr15_058283898_63_m0   | chr15 | 58283898  | 58283960  | - | 0 | 63   | 3.55    | Intergenic        |                 |   |       |                       |                 |
| CONGO chr15_058343875_73_p1   | chr15 | 58343875  | 58343947  | + | 1 | 73   | 92.83   | Intergenic        |                 |   |       |                       |                 |
| CONGO chr15_058604967_48_m2   | chr15 | 58604967  | 58605014  | - | 2 | 48   | 100.9   | Intron            |                 |   |       |                       |                 |
| CONGO chr15_058756642_82_m1   | chr15 | 58756642  | 58756723  | - | 1 | 82   | 170.87  | Intron            |                 | 1 |       |                       |                 |
| CONGO chr15_061679949_234_p1  | chr15 | 61679949  | 61680182  | + | 1 | 234  | 485.73  | UTR               |                 | 1 | TU541 | SpliceToPCG           | ENSG00000140455 |
| CONGO chr15_062002122_474_m0  | chr15 | 62002122  | 62002595  | - | 0 | 474  | 2567.48 | Intron            |                 |   | TU542 | SpliceToPCG           | ENSG00000035664 |
| CONGO chr15_063991474_119_m2  | chr15 | 63991474  | 63991592  | - | 2 | 119  | 131.13  | NCExon            |                 | 1 | TU543 | SpliceToPCG           | ENSG00000157890 |
| CONGO chr15_064986651_101_m2  | chr15 | 64986651  | 64986761  | - | 2 | 101  | 63.54   | Intergenic        |                 |   |       |                       |                 |
| CONGO chr15_065800214_74_p0   | chr15 | 65800214  | 65800287  | + | 0 | 74   | 0.63    | Intron            |                 |   |       |                       |                 |
| CONGO chr15_067504675_42_p1   | chr15 | 67504675  | 67504716  | + | 1 | 42   | 33.8    | NCExon            |                 | 1 | TU544 | SpliceToPCG           | ENSG00000137807 |
| CONGO chr15_070576186_68_p2   | chr15 | 70576186  | 70576253  | + | 2 | 68   | 210.51  | Intron            |                 | 1 | TU545 | SpliceToPCG           | ENSG00000166233 |
| CONGO chr15_073305452_107_m2  | chr15 | 73305452  | 73305558  | - | 2 | 107  | 14.79   | Intergenic        |                 | 1 |       |                       |                 |
| CONGO chr15_075975765_1034_p1 | chr15 | 75975765  | 75976798  | + | 1 | 1034 | 2757.52 | Intergenic        | Laminin_G_2     |   |       |                       |                 |
| CONGO chr15_075976862_887_p0  | chr15 | 75976862  | 75977748  | + | 0 | 887  | 2682.95 | Intergenic        |                 | 1 |       |                       |                 |
| CONGO chr15_075977774_162_p0  | chr15 | 759777    |           |   |   |      |         |                   |                 |   |       |                       |                 |







|                               |       |          |          |   |   |      |         |                 |               |              |       |                       |                       |                 |
|-------------------------------|-------|----------|----------|---|---|------|---------|-----------------|---------------|--------------|-------|-----------------------|-----------------------|-----------------|
| CONGO_chr17_024430875_1270_m1 | chr17 | 24430875 | 24432144 | - | 1 | 1270 | 9466.29 | Intron          |               | 1            | TU67  | SpliceToPCG           | ENSG00000196535       |                 |
| CONGO_chr17_024477037_75_m0   | chr17 | 24477037 | 24477111 | - | 0 | 75   | 29.42   | Intron          |               | 1            | TU67  | SpliceToPCG           | ENSG00000196535       |                 |
| CONGO_chr17_024479219_432_m1  | chr17 | 24479219 | 24479650 | - | 1 | 432  | 1582.74 | UTR             |               | 1            | TU67  | SpliceToPCG           | ENSG00000196535       |                 |
| CONGO_chr17_024482527_60_m0   | chr17 | 24482527 | 24482586 | - | 0 | 60   | 190.23  | UTR             |               | 1            | TU67  | SpliceToPCG           | ENSG00000196535       |                 |
| CONGO_chr17_024638477_59_p2   | chr17 | 24638477 | 24638535 | + | 2 | 59   | 147     | AntisenseCDS    |               | 1            | TU600 | NovelMultiExon        |                       |                 |
| CONGO_chr17_027573891_144_p1  | chr17 | 27573891 | 27574034 | + | 1 | 144  | 310.79  | Intron          |               | 1            | TU601 | SpliceToPCG           | ENSG00000126858       |                 |
| CONGO_chr17_027729047_66_p0   | chr17 | 27729047 | 27729112 | + | 0 | 66   | 32.37   | UTR             |               | 1            | TU602 | SpliceToPCG           | ENSG00000102444       |                 |
| CONGO_chr17_031975581_80_p2   | chr17 | 31975581 | 31975660 | + | 2 | 80   | 89.7    | UTR             |               | 1            | TU603 | SpliceToPCG           | ENSG00000050955       |                 |
| CONGO_chr17_032384498_110_m2  | chr17 | 32384498 | 32384607 | - | 2 | 110  | 646.1   | AntisenseCDS    |               | 1            | TU604 | NovelMultiExon        |                       |                 |
| CONGO_chr17_032410584_167_m0  | chr17 | 32410584 | 32410750 | - | 0 | 167  | 129.82  | AntisenseIntron |               |              |       |                       |                       |                 |
| CONGO_chr17_032424328_138_m0  | chr17 | 32424328 | 32424465 | - | 0 | 138  | 29.64   | AntisenseIntron |               |              |       |                       |                       |                 |
| CONGO_chr17_032534210_106_p1  | chr17 | 32534210 | 32534315 | - | 1 | 106  | 93.11   | AntisenseIntron |               |              |       |                       |                       |                 |
| CONGO_chr17_032540993_93_p0   | chr17 | 32540993 | 32541085 | + | 0 | 93   | 1.52    | AntisenseIntron |               |              |       |                       |                       |                 |
| CONGO_chr17_03261474_81_p1    | chr17 | 3261474  | 32614854 | + | 1 | 81   | 80.62   | AntisenseIntron |               |              |       |                       |                       |                 |
| CONGO_chr17_033618861_122_m2  | chr17 | 33618861 | 33618982 | + | 2 | 122  | 193.3   | NCExon          |               | 1            | TU114 | NovelMultiExon        |                       |                 |
| CONGO_chr17_033628903_78_m2   | chr17 | 33628903 | 33628980 | - | 2 | 78   | 186.96  | NCExon          | 1             | Peptidase_M1 | 1     | TU114                 | NovelMultiExon        |                 |
| CONGO_chr17_033652033_85_m0   | chr17 | 33652033 | 33652117 | - | 0 | 85   | 213.3   | NCExon          | 1             |              | 1     | TU114                 | NovelMultiExon        |                 |
| CONGO_chr17_033955035_186_m0  | chr17 | 33955035 | 33955220 | - | 0 | 186  | 341.88  | Intron          |               | 1            | TU605 | SpliceToPCG           | ENSG00000017373       |                 |
| CONGO_chr17_034005846_63_m2   | chr17 | 34005846 | 34005908 | - | 2 | 63   | 217.42  | Intron          |               |              |       |                       |                       |                 |
| CONGO_chr17_034335473_78_p0   | chr17 | 34335473 | 34335550 | + | 0 | 78   | 248.26  | NCExon          |               | 1            | TU606 | NovelMultiExon        |                       |                 |
| CONGO_chr17_034647610_83_p0   | chr17 | 34647610 | 34647692 | + | 0 | 83   | 106.68  | Intron          |               | 1            | TU607 | SpliceToPCG           | ENSG00000223399       |                 |
| CONGO_chr17_034972746_181_m1  | chr17 | 34972746 | 34972926 | - | 1 | 181  | 18.48   | Intergenic      |               |              |       |                       |                       |                 |
| CONGO_chr17_035017615_157_p1  | chr17 | 35017615 | 35017771 | + | 1 | 157  | 34.76   | AntisenseUTR    |               |              |       |                       |                       |                 |
| CONGO_chr17_035109664_137_m1  | chr17 | 35109664 | 35109800 | - | 1 | 137  | 27.23   | AntisenseUTR    |               |              |       |                       |                       |                 |
| CONGO_chr17_035541016_62_m0   | chr17 | 35541016 | 35541077 | - | 0 | 62   | 208.01  | AntisenseUTR    |               |              |       | NovelUnspliced        |                       |                 |
| CONGO_chr17_035722243_100_p1  | chr17 | 35722243 | 35722349 | + | 1 | 100  | 35.72   | Intron          |               |              |       |                       |                       |                 |
| CONGO_chr17_036569744_196_m1  | chr17 | 36569744 | 36569939 | + | 1 | 196  | 97.88   | UTR             | Keratin_B2    | 1            |       |                       |                       |                 |
| CONGO_chr17_036622729_208_p2  | chr17 | 36622729 | 36622936 | + | 2 | 208  | 293.82  | Intron          |               |              |       |                       |                       |                 |
| CONGO_chr17_037036568_50_m1   | chr17 | 37036568 | 37036617 | - | 1 | 50   | 155.08  | NCExon          | 1             |              | TU223 | SpliceToNCG           | ENSG00000214514       |                 |
| CONGO_chr17_037043650_99_m0   | chr17 | 37043650 | 37043748 | - | 0 | 99   | 53.54   | NCIntron        |               |              |       |                       |                       |                 |
| CONGO_chr17_037422966_222_m2  | chr17 | 37422966 | 37423187 | - | 2 | 222  | 91.55   | UTR             |               | 1            | TU609 | SpliceToPCG           | ENSG00000168259       |                 |
| CONGO_chr17_037445249_771_m0  | chr17 | 37445249 | 37446019 | - | 0 | 771  | 2854.17 | Intron          |               |              |       |                       |                       |                 |
| CONGO_chr17_037446047_687_m0  | chr17 | 37446047 | 37446733 | - | 0 | 687  | 1428.35 | Intron          |               |              |       |                       |                       |                 |
| CONGO_chr17_037448378_190_m1  | chr17 | 37448378 | 37448567 | - | 1 | 190  | 288.18  | Intron          |               |              |       |                       |                       |                 |
| CONGO_chr17_037448361_310_m0  | chr17 | 37448361 | 37448920 | - | 0 | 310  | 766.92  | Intron          |               |              |       |                       |                       |                 |
| CONGO_chr17_037908338_75_p0   | chr17 | 37908338 | 37908412 | + | 0 | 75   | 85.07   | Intron          |               |              |       |                       |                       |                 |
| CONGO_chr17_038277948_286_p2  | chr17 | 38277948 | 38278328 | + | 2 | 286  | 779.8   | Intergenic      | Cu_amine_oxid | 1            | TU610 | SpliceToPCG           | ENSG00000033627       |                 |
| CONGO_chr17_038278936_130_p1  | chr17 | 38278936 | 38279065 | + | 1 | 130  | 347.49  | Intergenic      | Cu_amine_oxid | 1            | TU115 | SpliceToPCG           | ENSG00000131467       |                 |
| CONGO_chr17_038279637_189_p0  | chr17 | 38279637 | 38279825 | + | 0 | 189  | 629.9   | Intergenic      | Cu_amine_oxid | 1            | TU115 | SpliceToPCG           | ENSG00000131467       |                 |
| CONGO_chr17_038736027_105_m0  | chr17 | 38736027 | 38736131 | - | 0 | 105  | 423.66  | NCExon          |               | 1            | TU611 | SpliceToNCG           | ENSG00000236383       |                 |
| CONGO_chr17_038975865_76_m0   | chr17 | 38975865 | 38975940 | - | 0 | 76   | 19.76   | Intron          |               |              |       |                       |                       |                 |
| CONGO_chr17_039371122_170_p0  | chr17 | 39371122 | 39371291 | + | 0 | 170  | 150.21  | Intergenic      |               |              | 1     | TU612                 | NovelMultiExon        |                 |
| CONGO_chr17_039499410_134_p1  | chr17 | 39499410 | 39499543 | + | 1 | 134  | 48.61   | AntisenseCDS    |               |              |       | UnsplicedMergeWithPCG | ENSG00000161654       |                 |
| CONGO_chr17_039871408_202_m0  | chr17 | 39871408 | 39871609 | - | 0 | 202  | 27.45   | UTR             |               | 1            | TU613 | SpliceToPCG           | ENSG00000186566       |                 |
| CONGO_chr17_040113493_45_p0   | chr17 | 40113493 | 40113537 | - | 0 | 45   | 25.83   | AntisenseCDS    |               |              | 1     |                       |                       |                 |
| CONGO_chr17_040843381_57_m0   | chr17 | 40843381 | 40843437 | - | 0 | 57   | 64.55   | UTR             |               |              | 1     | TU615                 | SpliceToPCG           | ENSG00000159314 |
| CONGO_chr17_040948349_153_m2  | chr17 | 40948349 | 40948501 | - | 2 | 153  | 69.02   | UTR             | 1             |              | 1     | TU616                 | SpliceToPCG           | ENSG00000214420 |
| CONGO_chr17_043414788_99_p0   | chr17 | 43414788 | 43414886 | + | 0 | 99   | 20.16   | Intergenic      |               |              |       |                       |                       |                 |
| CONGO_chr17_043486618_163_p1  | chr17 | 43486618 | 43486780 | + | 1 | 163  | 26.48   | Intron          |               |              | 1     | TU618                 | SpliceToPCG           | ENSG00000082641 |
| CONGO_chr17_043581913_102_p2  | chr17 | 43581913 | 43582014 | + | 2 | 102  | 60.5    | AntisenseIntron |               |              |       |                       |                       |                 |
| CONGO_chr17_043585696_130_m0  | chr17 | 43585696 | 43585825 | - | 0 | 130  | 102.22  | Intron          |               |              |       |                       |                       |                 |
| CONGO_chr17_043593092_83_p2   | chr17 | 43593092 | 43593174 | + | 2 | 83   | 23.16   | AntisenseIntron |               |              |       |                       |                       |                 |
| CONGO_chr17_043610956_63_m2   | chr17 | 43610956 | 43611018 | - | 2 | 63   | 80.51   | Intron          |               |              |       |                       |                       |                 |
| CONGO_chr17_043726700_118_m1  | chr17 | 43726700 | 43726817 | - | 1 | 118  | 39.46   | AntisenseNCExon |               |              |       |                       |                       |                 |
| CONGO_chr17_043987892_88_m1   | chr17 | 43987892 | 43987979 | - | 1 | 88   | 16.13   | UTR             |               | 1            | TU619 | SpliceToPCG           | ENSG00000108511       |                 |
| CONGO_chr17_044287194_75_p0   | chr17 | 44287194 | 44287268 | + | 0 | 75   | 34.35   | UTR             |               |              | TU620 | SpliceToPCG           | ENSG00000136436       |                 |
| CONGO_chr17_046183648_114_m0  | chr17 | 46183648 | 46183761 | - | 0 | 114  | 39.86   | AntisenseUTR    |               | 1            | TU621 | UnsplicedMergeWithPCG | ENSG00000108484       |                 |
| CONGO_chr17_046500292_81_m0   | chr17 | 46500292 | 46500372 | - | 0 | 81   | 277.65  | Intron          |               |              | 1     | TU621                 | SpliceToPCG           | ENSG00000080294 |
| CONGO_chr17_046618385_184_m0  | chr17 | 46618385 | 46618568 | - | 0 | 184  | 103.73  | Intron          |               | 1            | TU622 | SpliceToPCG           | ENSG00000011258       |                 |
| CONGO_chr17_050943419_276_m0  | chr17 | 50943419 | 50943694 | - | 0 | 276  | 1635.86 | Intergenic      |               |              |       |                       |                       |                 |
| CONGO_chr17_051394422_110_p0  | chr17 | 51394422 | 51394531 | + | 0 | 110  | 464.13  | Intergenic      |               |              |       |                       |                       |                 |
| CONGO_chr17_051397939_98_p1   | chr17 | 51397939 | 51398036 | + | 1 | 98   | 262.11  | Intergenic      |               |              |       |                       |                       |                 |
| CONGO_chr17_051478599_61_p0   | chr17 | 51478599 | 51478659 | + | 0 | 61   | 213.51  | Intergenic      |               |              |       |                       |                       |                 |
| CONGO_chr17_053437396_54_p1   | chr17 | 53437396 | 53437449 | + | 1 | 54   | 36.92   | AntisenseUTR    |               | 1            | TU623 | NovelMultiExon        |                       |                 |
| CONGO_chr17_054785465_33_m0   | chr17 | 54785465 | 54785497 | - | 0 | 33   | 104.01  | AntisenseUTR    |               |              |       |                       |                       |                 |
| CONGO_chr17_056264448_96_m2   | chr17 | 56264448 | 56264543 | - | 2 | 96   | 24.12   | AntisenseIntron |               |              |       |                       |                       |                 |
| CONGO_chr17_056577258_164_m0  | chr17 | 56577258 | 56577421 | - | 0 | 164  | 136.56  | AntisenseIntron |               |              |       |                       |                       |                 |
| CONGO_chr17_056768309_118_m0  | chr17 | 56768309 | 56768426 | - | 0 | 118  | 23.61   | AntisenseIntron |               |              |       |                       |                       |                 |
| CONGO_chr17_056799096_104_m0  | chr17 | 56799096 | 56799199 | - | 0 | 104  | 28.94   | AntisenseIntron |               |              |       |                       |                       |                 |
| CONGO_chr17_057679149_148_m0  | chr17 | 57679149 | 57679296 | - | 0 | 148  | 70.99   | Intergenic      | 1             |              | TU624 | NovelMultiExon        |                       |                 |
| CONGO_chr17_057740518_54_p2   | chr17 | 57740518 | 57740571 | + | 2 | 54   | 56.19   | Intergenic      |               |              |       |                       |                       |                 |
| CONGO_chr17_057741035_105_p2  | chr17 | 57741035 | 57741139 | + | 2 | 105  | 162.78  | Intergenic      |               |              |       |                       |                       |                 |
| CONGO_chr17_057772215_105_p2  | chr17 | 57772215 | 57772319 | + | 2 | 105  | 178     | Intergenic      |               |              |       |                       |                       |                 |
| CONGO_chr17_057772981_54_p2   | chr17 | 57772981 | 57773034 | + | 2 | 54   | 61.64   | Intergenic      |               |              |       |                       |                       |                 |
| CONGO_chr17_057781764_105_p2  | chr17 | 57781764 | 57781868 | + | 2 | 105  | 184.26  | Intergenic      |               |              |       |                       |                       |                 |
| CONGO_chr17_057800263_54_p2   | chr17 | 57800263 | 57800316 | + | 2 | 54   | 151.72  | Intergenic      |               |              |       |                       |                       |                 |
| CONGO_chr17_058181296_254_m0  | chr17 | 58181296 | 58181549 | - | 0 | 254  | 1496.45 | Intron          |               |              | TU225 | SpliceToPCG           | ENSG00000173838       |                 |
| CONGO_chr17_058181559_71_m2   | chr17 | 58181559 | 58181629 | - | 2 | 71   | 117.5   | Intron          |               |              | TU225 | SpliceToPCG           | ENSG00000173838       |                 |
| CONGO_chr17_058530342_109_m0  | chr17 | 58530342 | 58530450 | - | 0 | 109  | 299.85  | Intron          |               |              | 1     | TU226                 | SpliceToPCG           | ENSG00000170921 |
| CONGO_chr17_058582363_111_p2  | chr17 | 58582363 | 58582473 | - | 2 | 111  | 256.63  | Intron          |               | 1            | TU226 | SpliceToPCG           | ENSG00000170921       |                 |
| CONGO_chr17_059927361_95_p2   | chr17 | 59927361 | 59927455 | + | 2 | 95   | 48.82   | AntisenseIntron |               |              | 1     | TU116                 | UnsplicedMergeWithPCG | ENSG00000108654 |
| CONGO_chr17_059927883_80_p2   | chr17 | 59927883 | 59927962 | + | 2 | 80   | 145.04  | AntisenseIntron |               |              | 1     | TU116                 | NovelMultiExon        |                 |
| CONGO_chr17_059928347_163_p1  | chr17 | 59928347 | 59928509 | + | 1 | 163  | 3.95    | AntisenseIntron |               |              | 1     | TU116                 | NovelMultiExon        |                 |
| CONGO_chr17_060176496_93_m0   | chr17 | 60176496 | 60176588 | - | 0 | 93   | 27.63   | UTR             |               | 1            | TU668 | SpliceToPCG           | ENSG00000215769       |                 |
| CONGO_chr17_060178387_150_m0  | chr17 | 60178387 | 60178536 | - | 0 | 150  | 589.47  | UTR             |               | 1            | TU668 | SpliceToPCG           | ENSG00000215769       |                 |
| CONGO_chr17_060188496_132_m1  | chr17 | 60188496 | 60188627 | - | 1 | 132  | 25.95   | UTR             |               | 1            | TU668 | SpliceToPCG           | ENSG00000215769       |                 |
| CONGO_chr17_060188935_356_m0  | chr17 | 60188935 | 60189290 | - | 0 | 356  | 495.76  | UTR             |               | 1            | TU668 | SpliceToPCG           | ENSG00000215769       |                 |
| CONGO_chr17_060380257_397_p0  | chr17 | 60380257 | 60380653 | + | 0 | 397  | 1109.12 | Intergenic      |               |              | 1     |                       |                       |                 |
| CONGO_chr17_060394898_64_m0   | chr17 | 60394898 | 60394961 | - | 0 | 64   | 34.78   | NCExon          |               | 1            | TU333 | SpliceToNCG           | ENSG00000214174       |                 |
| CONGO_chr17_060395895_121_m1  | chr17 | 60395895 | 60396015 | - | 1 | 121  | 402.53  | NCIntron        |               | 1            | TU333 | SpliceToNCG           | ENSG00000214174       |                 |
| CONGO_chr17_060399114_129_m2  | chr17 | 60399114 | 60399242 | - | 2 | 129  | 332.07  | NCExon          |               | 1            | TU333 | SpliceToNCG           | ENSG00000214174       |                 |
| CONGO_chr17_060399334_155_m1  | chr17 | 60399334 | 60399488 | - |   |      |         |                 |               |              |       |                       |                       |                 |









|                              |       |           |           |   |   |     |         |                   |                |  |   |       |                       |                 |
|------------------------------|-------|-----------|-----------|---|---|-----|---------|-------------------|----------------|--|---|-------|-----------------------|-----------------|
| CONGO_chr2_179225625_84_m2   | chr2  | 179225625 | 179225708 | - | 2 | 84  | 259.74  | Intron            |                |  | 1 | TU77  | NovelMultiExon        |                 |
| CONGO_chr2_179225820_84_m2   | chr2  | 179225820 | 179225903 | - | 2 | 84  | 109.73  | Intron            |                |  |   | TU77  | NovelMultiExon        |                 |
| CONGO_chr2_179226013_84_m2   | chr2  | 179226013 | 179226096 | - | 2 | 84  | 78.88   | Intron            |                |  |   | TU77  | NovelMultiExon        |                 |
| CONGO_chr2_179248643_84_m2   | chr2  | 179248643 | 179248726 | - | 2 | 84  | 57.55   | Intron            |                |  |   | TU77  | NovelMultiExon        |                 |
| CONGO_chr2_179250173_87_m2   | chr2  | 179250173 | 179250259 | - | 2 | 87  | 205.49  | NCExon            |                |  | 1 | TU882 | NovelMultiExon        |                 |
| CONGO_chr2_179325146_122_m0  | chr2  | 179325146 | 179325267 | - | 0 | 122 | 142.47  | Intron            |                |  |   | TU883 | NovelMultiExon        |                 |
| CONGO_chr2_181899893_69_p0   | chr2  | 181899893 | 181899961 | + | 0 | 69  | 67.87   | NCIntron          |                |  |   |       |                       |                 |
| CONGO_chr2_182247579_129_p0  | chr2  | 182247579 | 182247707 | + | 0 | 129 | 77.03   | AntisenseIntron   |                |  |   |       |                       |                 |
| CONGO_chr2_183576705_80_m0   | chr2  | 183576705 | 183576784 | - | 0 | 80  | 15.48   | Intron            |                |  |   | TU884 | SpliceToPCG           | ENSG00000061676 |
| CONGO_chr2_187709879_71_m0   | chr2  | 187709879 | 187709949 | - | 0 | 71  | 26.72   | AntisenseNCIntron |                |  |   |       |                       |                 |
| CONGO_chr2_190234492_90_p0   | chr2  | 190234492 | 190234581 | + | 0 | 90  | 271.35  | UTR               |                |  | 1 | TU78  | SpliceToPCG           | ENSG00000138381 |
| CONGO_chr2_190236872_54_p0   | chr2  | 190236872 | 190236925 | + | 0 | 54  | 296.55  | UTR               |                |  | 1 | TU78  | SpliceToPCG           | ENSG00000138381 |
| CONGO_chr2_190238347_76_p0   | chr2  | 190238347 | 190238422 | + | 0 | 76  | 465.28  | UTR               |                |  | 1 | TU78  | SpliceToPCG           | ENSG00000138381 |
| CONGO_chr2_190239012_71_p2   | chr2  | 190239012 | 190239081 | + | 2 | 71  | 60.48   | Intron            |                |  | 1 | TU78  | SpliceToPCG           | ENSG00000138381 |
| CONGO_chr2_190633791_57_m0   | chr2  | 190633791 | 190633847 | + | 0 | 57  | 96.28   | Intron            |                |  |   |       |                       |                 |
| CONGO_chr2_197563649_248_m2  | chr2  | 197563649 | 197563896 | - | 2 | 248 | 734.73  | NCExon            |                |  | 1 | TU885 | SpliceToPCG           | ENSG00000065413 |
| CONGO_chr2_198358025_170_m2  | chr2  | 198358025 | 198358194 | - | 2 | 170 | 82.52   | UTR               |                |  | 1 | TU886 | SpliceToPCG           | ENSG00000152430 |
| CONGO_chr2_199236062_108_p0  | chr2  | 199236062 | 199236169 | - | 0 | 108 | 24.4    | AntisenseNCIntron |                |  |   |       |                       |                 |
| CONGO_chr2_200030307_105_m2  | chr2  | 200030307 | 200030411 | - | 2 | 105 | 87.41   | UTR               |                |  | 1 | TU887 | SpliceToPCG           | ENSG00000119042 |
| CONGO_chr2_200392540_186_m2  | chr2  | 200392540 | 200392725 | - | 2 | 186 | 175.68  | NCExon            |                |  | 1 | TU888 | SpliceToPCG           | ENSG00000226124 |
| CONGO_chr2_200424932_65_p0   | chr2  | 200424932 | 200424996 | + | 0 | 65  | 102     | Intergenic        |                |  |   |       |                       |                 |
| CONGO_chr2_201433125_242_p2  | chr2  | 201433125 | 201433366 | + | 2 | 242 | 43.98   | AntisenseCDS      |                |  | 1 |       |                       |                 |
| CONGO_chr2_202775397_139_p1  | chr2  | 202775397 | 202775535 | + | 1 | 139 | 228.14  | Intergenic        |                |  |   | TU889 | SpliceToPCG           | ENSG00000182329 |
| CONGO_chr2_203670515_87_p0   | chr2  | 203670515 | 203670601 | - | 0 | 87  | 207.15  | NCExon            |                |  |   | TU890 | SpliceToPCG           | ENSG00000144426 |
| CONGO_chr2_204654859_87_m1   | chr2  | 204654859 | 204654945 | - | 1 | 87  | 58.62   | Intergenic        |                |  |   |       |                       |                 |
| CONGO_chr2_206255590_72_m1   | chr2  | 206255590 | 206255661 | - | 1 | 72  | 66.01   | AntisenseUTR      |                |  |   |       | UnsplicedMergeWithPCG | ENSG00000118257 |
| CONGO_chr2_206279169_87_m1   | chr2  | 206279169 | 206279255 | - | 1 | 87  | 23.15   | AntisenseIntron   |                |  |   |       |                       |                 |
| CONGO_chr2_206400859_93_m0   | chr2  | 206400859 | 206400951 | - | 0 | 93  | 11.66   | Intergenic        |                |  |   |       |                       |                 |
| CONGO_chr2_206465115_81_p2   | chr2  | 206465115 | 206465195 | + | 2 | 81  | 14.25   | Intergenic        |                |  |   |       |                       |                 |
| CONGO_chr2_207243456_75_m0   | chr2  | 207243456 | 207243530 | - | 0 | 75  | 527.62  | Intron            |                |  |   |       |                       |                 |
| CONGO_chr2_207686605_107_m2  | chr2  | 207686605 | 207686711 | - | 2 | 107 | 11.36   | Intron            |                |  |   |       |                       |                 |
| CONGO_chr2_208102784_204_p1  | chr2  | 208102784 | 208102987 | + | 1 | 204 | 37.19   | UTR               |                |  | 1 | TU891 | SpliceToPCG           | ENSG00000118260 |
| CONGO_chr2_208543541_92_p2   | chr2  | 208543541 | 208543632 | + | 2 | 92  | 15.36   | AntisenseIntron   |                |  |   |       |                       |                 |
| CONGO_chr2_210260688_243_p2  | chr2  | 210260688 | 210260930 | + | 2 | 243 | 472.86  | Intron            |                |  |   |       |                       |                 |
| CONGO_chr2_210467176_160_p0  | chr2  | 210467176 | 210467335 | - | 0 | 160 | 287.68  | Intron            |                |  |   | TU893 | SpliceToPCG           | ENSG00000144406 |
| CONGO_chr2_210543943_82_m1   | chr2  | 210543943 | 210544023 | - | 1 | 82  | 37.33   | AntisenseIntron   |                |  |   |       |                       |                 |
| CONGO_chr2_213720440_67_m0   | chr2  | 213720440 | 213720506 | - | 0 | 67  | 109.99  | UTR               |                |  |   |       |                       |                 |
| CONGO_chr2_215953801_141_p1  | chr2  | 215953801 | 215953941 | + | 1 | 141 | 261.17  | AntisenseCDS      |                |  | 1 | TU894 | NovelMultiExon        |                 |
| CONGO_chr2_218583068_117_m0  | chr2  | 218583068 | 218583184 | - | 0 | 117 | 146.38  | Intergenic        |                |  |   | TU895 | SpliceToPCG           | ENSG00000079308 |
| CONGO_chr2_220019233_67_p1   | chr2  | 220019233 | 220019299 | + | 1 | 67  | 28.03   | Intron            |                |  |   |       |                       |                 |
| CONGO_chr2_221998896_55_p1   | chr2  | 221998896 | 221998950 | + | 1 | 55  | 40.71   | AntisenseUTR      |                |  | 1 |       | UnsplicedMergeWithPCG | ENSG00000116106 |
| CONGO_chr2_222841904_108_p0  | chr2  | 222841904 | 222842011 | - | 0 | 108 | 6.03    | AntisenseIntron   |                |  |   |       |                       |                 |
| CONGO_chr2_222891991_876_m0  | chr2  | 222891991 | 222892866 | - | 0 | 876 | 1443.63 | AntisenseNCExon   | zf-C3HC4       |  |   |       |                       |                 |
| CONGO_chr2_225410272_46_m0   | chr2  | 225410272 | 225410317 | - | 0 | 46  | 66.45   | Intron            |                |  |   |       |                       |                 |
| CONGO_chr2_225555168_162_m0  | chr2  | 225555168 | 225555329 | - | 0 | 162 | 721.06  | NCExon            |                |  | 1 | TU897 | SpliceToPCG           | ENSG00000135905 |
| CONGO_chr2_227960643_267_m0  | chr2  | 227960643 | 227960909 | - | 0 | 267 | 356.09  | Intergenic        |                |  |   |       |                       |                 |
| CONGO_chr2_228171850_182_m0  | chr2  | 228171850 | 228172031 | - | 0 | 182 | 415.13  | Intergenic        |                |  |   |       |                       |                 |
| CONGO_chr2_228172038_178_p1  | chr2  | 228172038 | 228172215 | + | 1 | 178 | 49.16   | Intergenic        |                |  |   |       |                       |                 |
| CONGO_chr2_228181744_140_p0  | chr2  | 228181744 | 228181883 | - | 0 | 140 | 11.2    | Intergenic        |                |  |   |       |                       |                 |
| CONGO_chr2_228187498_303_m0  | chr2  | 228187498 | 228187800 | - | 0 | 303 | 366.54  | Intron            |                |  |   |       |                       |                 |
| CONGO_chr2_228190458_318_p0  | chr2  | 228190458 | 228190775 | - | 0 | 318 | 502.69  | AntisenseNCExon   |                |  | 1 |       | UnsplicedMergeWithNCG | ENSG00000236116 |
| CONGO_chr2_228221234_162_m0  | chr2  | 228221234 | 228221395 | - | 0 | 162 | 387.7   | Intergenic        | Folate carrier |  |   | TU898 | SpliceToPCG           | ENSG00000135917 |
| CONGO_chr2_228297400_318_m0  | chr2  | 228297400 | 228297717 | - | 0 | 318 | 424.86  | Intergenic        |                |  |   |       |                       |                 |
| CONGO_chr2_228301295_291_p0  | chr2  | 228301295 | 228301585 | + | 0 | 291 | 474.53  | Intergenic        |                |  |   |       |                       |                 |
| CONGO_chr2_228318854_327_p0  | chr2  | 228318854 | 228319180 | + | 0 | 327 | 450.46  | Intergenic        |                |  |   |       |                       |                 |
| CONGO_chr2_230711598_139_p2  | chr2  | 230711598 | 230711736 | + | 2 | 139 | 468.22  | NCIntron          |                |  |   |       |                       |                 |
| CONGO_chr2_231563652_421_p0  | chr2  | 231563652 | 231564072 | + | 0 | 421 | 707.36  | AntisenseNCIntron |                |  |   | TU899 | SpliceToPCG           | ENSG00000173699 |
| CONGO_chr2_232064788_239_m1  | chr2  | 232064788 | 232067026 | + | 1 | 239 | 3.62    | Intergenic        |                |  |   |       | NovelUnspliced        |                 |
| CONGO_chr2_233093553_97_p0   | chr2  | 233093553 | 233093649 | + | 0 | 97  | 25.52   | Intergenic        |                |  | 1 |       |                       |                 |
| CONGO_chr2_233094275_108_p2  | chr2  | 233094275 | 233094382 | + | 2 | 108 | 495.38  | Intergenic        |                |  | 1 |       |                       |                 |
| CONGO_chr2_233094770_51_p2   | chr2  | 233094770 | 233094820 | + | 2 | 51  | 212.61  | Intergenic        |                |  | 1 |       |                       |                 |
| CONGO_chr2_233094925_190_p2  | chr2  | 233094925 | 233095114 | + | 2 | 190 | 1116.33 | Intergenic        | Trypsin        |  | 1 |       |                       |                 |
| CONGO_chr2_233095469_100_p1  | chr2  | 233095469 | 233095568 | + | 1 | 100 | 461.34  | Intergenic        |                |  | 1 |       |                       |                 |
| CONGO_chr2_233095656_160_p0  | chr2  | 233095656 | 233095815 | + | 0 | 160 | 739.93  | Intergenic        | Trypsin        |  | 1 |       |                       |                 |
| CONGO_chr2_233096014_143_p2  | chr2  | 233096014 | 233096156 | + | 2 | 143 | 1105.28 | Intergenic        | Trypsin        |  | 1 |       |                       |                 |
| CONGO_chr2_233096370_163_p0  | chr2  | 233096370 | 233096532 | + | 0 | 163 | 1224.14 | Intergenic        | Trypsin        |  | 1 |       |                       |                 |
| CONGO_chr2_238303162_67_p0   | chr2  | 238303162 | 238303228 | + | 0 | 67  | 162.54  | Intron            |                |  |   | TU901 | SpliceToPCG           | ENSG00000124831 |
| CONGO_chr2_241156812_393_p0  | chr2  | 241156812 | 241157004 | - | 0 | 393 | 335.56  | UTR               |                |  | 1 | TU266 | SpliceToPCG           | ENSG00000142327 |
| CONGO_chr2_241160513_141_p0  | chr2  | 241160513 | 241160625 | - | 0 | 141 | 978.68  | UTR               | Peptidase_M1   |  | 1 | TU266 | SpliceToPCG           | ENSG00000142327 |
| CONGO_chr2_241494604_78_p0   | chr2  | 241494604 | 241494681 | + | 0 | 78  | 93.38   | Intergenic        |                |  |   |       |                       |                 |
| CONGO_chr2_00503362_119_m0   | chr20 | 503362    | 503480    | - | 0 | 119 | 28.48   | Intergenic        |                |  |   |       |                       |                 |
| CONGO_chr2_005520484_49_m2   | chr20 | 5520484   | 5520532   | - | 2 | 49  | 31.87   | Intron            |                |  | 1 | TU783 | SpliceToPCG           | ENSG00000125772 |
| CONGO_chr20_007445455_117_m0 | chr20 | 7445455   | 7445571   | - | 0 | 117 | 59.72   | Intergenic        |                |  |   |       |                       |                 |
| CONGO_chr20_10224831_75_p1   | chr20 | 10224831  | 10224905  | + | 1 | 75  | 38.49   | NCExon            |                |  | 1 |       | UnsplicedMergeWithPCG | ENSG00000132639 |
| CONGO_chr20_10342417_119_m0  | chr20 | 10342417  | 10342535  | - | 0 | 119 | 246.35  | UTR               |                |  | 1 | TU784 | SpliceToPCG           | ENSG00000125863 |
| CONGO_chr20_13444987_87_m0   | chr20 | 13444987  | 13445075  | - | 0 | 87  | 84.93   | Intron            |                |  |   |       |                       |                 |
| CONGO_chr20_15821572_84_p2   | chr20 | 15821572  | 15821655  | + | 2 | 84  | 327.57  | AntisenseUTR      |                |  |   |       |                       |                 |
| CONGO_chr20_16576582_62_m2   | chr20 | 16576582  | 16576643  | - | 2 | 62  | 13.07   | Intergenic        |                |  |   |       |                       |                 |
| CONGO_chr20_20421347_105_p0  | chr20 | 20421347  | 20421451  | - | 0 | 105 | 83.33   | AntisenseIntron   |                |  |   |       |                       |                 |
| CONGO_chr20_20527323_141_m2  | chr20 | 20527323  | 20527463  | - | 2 | 141 | 659.14  | NCExon            |                |  | 1 | TU785 | SpliceToPCG           | ENSG00000188559 |
| CONGO_chr20_21019080_126_p0  | chr20 | 21019080  | 21019205  | - | 0 | 126 | 9.39    | Intergenic        |                |  | 1 |       |                       |                 |
| CONGO_chr20_29472994_149_m2  | chr20 | 29472994  | 29473142  | - | 2 | 149 | 10.25   | NCExon            | Defensin_beta  |  | 1 |       |                       |                 |
| CONGO_chr20_31257288_64_p0   | chr20 | 31257288  | 31257351  | - | 0 | 64  | 111.47  | NCExon            |                |  |   |       |                       |                 |
| CONGO_chr20_33328931_219_m0  | chr20 | 33328931  | 33329149  | - | 0 | 219 | 404.58  | NCExon            |                |  | 1 | TU787 | SpliceToPCG           | ENSG00000088298 |
| CONGO_chr20_37768313_82_m0   | chr20 | 37768313  | 37768394  | - | 0 | 82  | 23.89   | Intergenic        |                |  |   |       |                       |                 |
| CONGO_chr20_38774627_62_m2   | chr20 | 38774627  | 38774688  | - | 2 | 62  | 122.72  | Intergenic        |                |  |   |       |                       |                 |
| CONGO_chr20_40144036_55_p0   | chr20 | 40144036  | 40144090  | - | 0 | 55  | 387.2   | AntisenseCDS      |                |  | 1 | TU789 | NovelMultiExon        |                 |
| CONGO_chr20_43200573_77_m2   | chr20 | 43200573  | 43200649  | - | 2 | 77  | 182.22  | Intergenic        |                |  |   | TU248 | NovelMultiExon        |                 |
| CONGO_chr20_43200666_64_m2   | chr20 | 43200666  | 43200729  | - | 2 | 64  | 120.29  | Intergenic        |                |  |   | TU248 | NovelMultiExon        |                 |
| CONGO_chr20_43996754_97_p0   | chr20 | 43996754  | 43996850  | + | 0 | 97  | 51.17   | AntisenseCDS      |                |  | 1 | TU791 | SpliceToPCG           | ENSG00000100982 |
| CONGO_chr20_50203254_134_p0  | chr20 | 50203254  | 50203387  | + | 0 | 134 | 399.46  | AntisenseCDS      |                |  |   |       | UnsplicedMergeWithPCG | ENSG00000020256 |
|                              |       |           |           |   |   |     |         |                   |                |  |   |       |                       |                 |







|                              |      |           |           |   |   |      |         |                   |          |  |       |             |                       |                    |
|------------------------------|------|-----------|-----------|---|---|------|---------|-------------------|----------|--|-------|-------------|-----------------------|--------------------|
| CONGO_chr3_152984310_188_p0  | chr3 | 152984310 | 152984497 | + | 0 | 188  | 227.44  | NCExon            |          |  | 1     | TU283       | NovelMultiExon        |                    |
| CONGO_chr3_152984614_138_p1  | chr3 | 152984614 | 152984751 | + | 1 | 138  | 56.39   | NCExon            |          |  | 1     | 1           |                       |                    |
| CONGO_chr3_153499884_55_p1   | chr3 | 153499884 | 153499938 | + | 1 | 55   | 3.28    | UTR               |          |  | 1     | TU947       | SpliceToPCG           | ENSG00000152601    |
| CONGO_chr3_156491427_95_m2   | chr3 | 156491427 | 156491521 | - | 2 | 95   | 37.39   | NCExon            |          |  | 1     | TU948       | SpliceToNCG           | OTTHUMG00000158471 |
| CONGO_chr3_156904629_79_m0   | chr3 | 156904629 | 156904707 | - | 0 | 79   | 301.74  | UTR               |          |  | 1     | TU949       | SpliceToPCG           | OTTHUMG00000158477 |
| CONGO_chr3_159632443_70_p0   | chr3 | 159632443 | 159632512 | + | 0 | 70   | 96.03   | Intron            |          |  |       |             |                       |                    |
| CONGO_chr3_159632604_157_m2  | chr3 | 159632604 | 159632760 | - | 2 | 157  | 128.54  | AntisenseIntron   |          |  |       |             |                       |                    |
| CONGO_chr3_160041634_184_m1  | chr3 | 160041634 | 160041817 | - | 1 | 184  | 435.36  | Intergenic        |          |  |       |             |                       |                    |
| CONGO_chr3_160041906_383_m0  | chr3 | 160041906 | 160042288 | - | 0 | 383  | 618.53  | Intergenic        | 7m_1     |  |       |             |                       |                    |
| CONGO_chr3_160932818_80_p2   | chr3 | 160932818 | 160932897 | + | 2 | 80   | 49.22   | Intron            |          |  | 1     | TU950       | SpliceToPCG           | ENSG00000151967    |
| CONGO_chr3_169113268_119_p2  | chr3 | 169113268 | 169113386 | + | 2 | 119  | 223.65  | NCExon            |          |  | 1     | TU136       | SpliceToNCG           | OTTHUMG00000158502 |
| CONGO_chr3_169115543_143_p0  | chr3 | 169115543 | 169115685 | + | 0 | 143  | 73.71   | NCExon            |          |  | 1     | TU136       | SpliceToNCG           | OTTHUMG00000158503 |
| CONGO_chr3_169117781_198_p1  | chr3 | 169117781 | 169117978 | + | 1 | 198  | 437.94  | NCIntron          |          |  |       |             |                       |                    |
| CONGO_chr3_169413563_57_m1   | chr3 | 169413563 | 169413619 | - | 1 | 57   | 3.41    | Intergenic        |          |  |       |             |                       |                    |
| CONGO_chr3_170316314_104_p1  | chr3 | 170316314 | 170316417 | + | 1 | 104  | 513.95  | AntisenseCDS      |          |  |       |             |                       |                    |
| CONGO_chr3_170316802_113_p2  | chr3 | 170316802 | 170316914 | + | 2 | 113  | 432.05  | AntisenseCDS      |          |  |       |             |                       |                    |
| CONGO_chr3_170442969_101_p1  | chr3 | 170442969 | 170443069 | + | 1 | 101  | 2.81    | AntisenseIntron   |          |  |       |             | UnsplicedMergeWithPCG | OTTHUMG00000158596 |
| CONGO_chr3_170565195_63_p0   | chr3 | 170565195 | 170565257 | + | 0 | 63   | 87.64   | AntisenseIntron   |          |  |       |             |                       |                    |
| CONGO_chr3_170600778_66_m0   | chr3 | 170600778 | 170600843 | - | 0 | 66   | 16.89   | Intron            |          |  |       |             |                       |                    |
| CONGO_chr3_170600869_81_m0   | chr3 | 170600869 | 170600949 | - | 0 | 81   | 0.09    | Intron            |          |  |       |             |                       |                    |
| CONGO_chr3_170676968_98_p2   | chr3 | 170676968 | 170677065 | + | 2 | 98   | 23.61   | AntisenseIntron   |          |  |       |             | NovelUnspliced        |                    |
| CONGO_chr3_170678512_105_m0  | chr3 | 170678512 | 170678616 | - | 0 | 105  | 89.54   | Intron            |          |  |       |             |                       |                    |
| CONGO_chr3_170775007_116_m1  | chr3 | 170775007 | 170775122 | - | 1 | 116  | 116.81  | Intron            |          |  |       |             |                       |                    |
| CONGO_chr3_170782017_74_p1   | chr3 | 170782017 | 170782090 | + | 1 | 74   | 134.18  | AntisenseIntron   |          |  |       |             |                       |                    |
| CONGO_chr3_174805774_75_m0   | chr3 | 174805774 | 174805848 | - | 0 | 75   | 5.45    | AntisenseIntron   |          |  |       |             |                       |                    |
| CONGO_chr3_181944661_265_m0  | chr3 | 181944661 | 181944925 | - | 0 | 265  | 3       | Intron            |          |  |       |             | NovelUnspliced        |                    |
| CONGO_chr3_182375145_140_m2  | chr3 | 182375145 | 182375284 | - | 2 | 140  | 90.42   | AntisenseNCIntron |          |  |       |             |                       |                    |
| CONGO_chr3_182375431_58_m2   | chr3 | 182375431 | 182375488 | - | 2 | 58   | 18.14   | AntisenseNCIntron |          |  |       |             |                       |                    |
| CONGO_chr3_182927354_224_p0  | chr3 | 182927354 | 182927577 | + | 0 | 224  | 61.04   | NCIntron          |          |  |       |             |                       |                    |
| CONGO_chr3_182952927_68_p1   | chr3 | 182952927 | 182952994 | + | 1 | 68   | 46.01   | NCIntron          |          |  |       |             |                       |                    |
| CONGO_chr3_183224362_106_m1  | chr3 | 183224362 | 183224467 | + | 1 | 106  | 39.93   | Intergenic        |          |  |       |             |                       |                    |
| CONGO_chr3_183461555_80_m1   | chr3 | 183461555 | 183461634 | - | 1 | 80   | 43.6    | Intergenic        |          |  |       |             |                       |                    |
| CONGO_chr3_183472039_171_p0  | chr3 | 183472039 | 183472209 | + | 0 | 171  | 25.16   | Intergenic        |          |  |       |             |                       |                    |
| CONGO_chr3_184333299_140_m2  | chr3 | 184333299 | 184333438 | - | 2 | 140  | 122.09  | Intron            | Lamp     |  | TU953 | SpliceToPCG | OTTHUMG00000158355    |                    |
| CONGO_chr3_185700227_245_m0  | chr3 | 185700227 | 185700471 | - | 0 | 245  | 486.83  | AntisenseIntron   |          |  |       |             |                       |                    |
| CONGO_chr3_185700502_135_m0  | chr3 | 185700502 | 185700636 | - | 0 | 135  | 45.2    | AntisenseIntron   |          |  |       |             |                       |                    |
| CONGO_chr3_185700779_74_m0   | chr3 | 185700779 | 185700852 | - | 0 | 74   | 9.4     | AntisenseIntron   |          |  |       |             | NovelUnspliced        |                    |
| CONGO_chr3_188922291_73_m0   | chr3 | 188922291 | 188922363 | - | 0 | 73   | 56.13   | UTR               |          |  | 1     | TU956       | SpliceToPCG           | OTTHUMG00000156441 |
| CONGO_chr3_189552868_62_p0   | chr3 | 189552868 | 189552929 | + | 0 | 62   | 30.42   | Intron            |          |  |       |             |                       |                    |
| CONGO_chr3_197119963_495_m0  | chr3 | 197119963 | 197120457 | - | 0 | 495  | 1488.68 | UTR               |          |  | 1     | TU957       | SpliceToPCG           | OTTHUMG00000155737 |
| CONGO_chr4_000558694_1158_m0 | chr4 | 558694    | 559581    | - | 0 | 1158 | 1870.43 | Intergenic        |          |  |       |             | NovelUnspliced        |                    |
| CONGO_chr4_001386720_884_m2  | chr4 | 1386720   | 1387603   | - | 2 | 884  | 2104.43 | Intergenic        | Homeobox |  | 1     |             |                       |                    |
| CONGO_chr4_001389768_463_m0  | chr4 | 1389768   | 1390230   | - | 0 | 463  | 937.92  | Intergenic        |          |  |       |             |                       |                    |
| CONGO_chr4_001913923_66_m0   | chr4 | 1913923   | 1913988   | - | 0 | 66   | 79.54   | AntisenseCDS      |          |  | 1     |             | UnsplicedMergeWithPCG | OTTHUMG00000121147 |
| CONGO_chr4_002416729_105_p0  | chr4 | 2416729   | 2416833   | + | 0 | 105  | 725.92  | UTR               |          |  | 1     | TU17        | SpliceToPCG           | ENSG00000206113    |
| CONGO_chr4_002422472_72_p0   | chr4 | 2422472   | 2422543   | + | 0 | 72   | 263.02  | Intergenic        |          |  | 1     | TU17        | SpliceToPCG           | ENSG00000206113    |
| CONGO_chr4_002422789_89_p0   | chr4 | 2422789   | 2422877   | + | 0 | 89   | 446.13  | Intergenic        |          |  | 1     | TU17        | SpliceToPCG           | ENSG00000206113    |
| CONGO_chr4_002423667_205_p1  | chr4 | 2423667   | 2423871   | + | 1 | 205  | 1414.57 | Intergenic        |          |  | 1     | TU17        | SpliceToPCG           | ENSG00000206113    |
| CONGO_chr4_002430248_142_p0  | chr4 | 2430248   | 2430389   | + | 0 | 142  | 823.73  | Intergenic        |          |  | 1     | TU17        | SpliceToPCG           | ENSG00000206113    |
| CONGO_chr4_002430632_152_p2  | chr4 | 2430632   | 2430783   | + | 2 | 152  | 670.57  | Intergenic        |          |  | 1     | TU17        | SpliceToPCG           | ENSG00000206113    |
| CONGO_chr4_002431562_206_p0  | chr4 | 2431562   | 2431767   | + | 0 | 206  | 2709.21 | Intergenic        |          |  | 1     | TU17        | SpliceToPCG           | ENSG00000206113    |
| CONGO_chr4_002433968_163_p1  | chr4 | 2433968   | 2434130   | + | 1 | 163  | 855.92  | Intergenic        |          |  | 1     | TU17        | SpliceToPCG           | ENSG00000206113    |
| CONGO_chr4_002567609_246_p0  | chr4 | 2567609   | 2567854   | + | 0 | 246  | 1995.85 | UTR               |          |  | 1     | TU137       | SpliceToPCG           | ENSG00000125386    |
| CONGO_chr4_002596787_134_p0  | chr4 | 2596787   | 2596920   | + | 0 | 134  | 1465.04 | UTR               |          |  | 1     | TU137       | SpliceToPCG           | ENSG00000125386    |
| CONGO_chr4_002597935_168_p1  | chr4 | 2597935   | 2598102   | + | 1 | 168  | 2002.55 | UTR               |          |  | 1     | TU137       | SpliceToPCG           | ENSG00000125386    |
| CONGO_chr4_003379014_85_p0   | chr4 | 3379014   | 3379098   | - | 0 | 85   | 27.07   | Intron            |          |  | 1     | TU958       | SpliceToPCG           | ENSG00000125386    |
| CONGO_chr4_004574583_122_p2  | chr4 | 4574583   | 4574704   | - | 2 | 122  | 21.25   | AntisenseIntron   |          |  |       |             |                       |                    |
| CONGO_chr4_006041332_494_m2  | chr4 | 6041332   | 6041825   | - | 2 | 494  | 1093.29 | NCExon            |          |  | 1     |             | UnsplicedMergeWithNCG | OTTHUMG00000125490 |
| CONGO_chr4_006060624_537_m0  | chr4 | 6060624   | 6061160   | - | 0 | 537  | 942.73  | Intergenic        |          |  |       |             |                       |                    |
| CONGO_chr4_006064458_139_m1  | chr4 | 6064458   | 6064596   | - | 1 | 139  | 612.73  | Intergenic        |          |  |       |             |                       |                    |
| CONGO_chr4_006070773_287_m0  | chr4 | 6070773   | 6071059   | - | 0 | 287  | 1292.75 | Intergenic        |          |  |       |             |                       |                    |
| CONGO_chr4_006122685_106_m0  | chr4 | 6122685   | 6122790   | - | 0 | 106  | 616.15  | Intron            |          |  |       |             |                       |                    |
| CONGO_chr4_008063057_120_m2  | chr4 | 8063057   | 8063176   | - | 2 | 120  | 187.25  | Intron            |          |  | 1     | TU959       | SpliceToPCG           | ENSG00000163995    |
| CONGO_chr4_008493450_96_p0   | chr4 | 8493450   | 8493545   | + | 0 | 96   | 263.27  | UTR               |          |  | 1     | TU284       | SpliceToPCG           | OTTHUMG00000128484 |
| CONGO_chr4_008493783_286_p0  | chr4 | 8493783   | 8494068   | + | 0 | 286  | 372.38  | UTR               |          |  | 1     | TU284       | SpliceToPCG           | ENSG00000205959    |
| CONGO_chr4_014613795_209_m2  | chr4 | 14613795  | 14614003  | - | 2 | 209  | 23.47   | Intergenic        |          |  |       |             | NovelUnspliced        |                    |
| CONGO_chr4_015807379_32_m2   | chr4 | 15807379  | 15807410  | - | 2 | 32   | 5.77    | Intron            |          |  | 1     | TU960       | SpliceToPCG           | ENSG00000169762    |
| CONGO_chr4_017485898_120_m0  | chr4 | 17485898  | 17486010  | - | 0 | 120  | 455.85  | Intron            |          |  |       |             | UnsplicedMergeWithPCG | ENSG00000215273    |
| CONGO_chr4_017486231_253_m1  | chr4 | 17486231  | 17486483  | - | 1 | 253  | 745.33  | Intron            |          |  |       |             | UnsplicedMergeWithPCG | ENSG00000215273    |
| CONGO_chr4_017486750_88_m1   | chr4 | 17486750  | 17486837  | - | 1 | 88   | 234.64  | Intron            |          |  |       |             |                       |                    |
| CONGO_chr4_017487100_299_m1  | chr4 | 17487100  | 17487398  | - | 1 | 299  | 189.54  | Intron            |          |  |       |             | NovelUnspliced        |                    |
| CONGO_chr4_017487805_318_m2  | chr4 | 17487805  | 17488122  | - | 2 | 318  | 668.68  | Intron            |          |  |       |             | NovelUnspliced        |                    |
| CONGO_chr4_020091095_78_m1   | chr4 | 20091095  | 20091172  | - | 1 | 78   | 45.74   | AntisenseIntron   |          |  |       |             |                       |                    |
| CONGO_chr4_023846359_116_p0  | chr4 | 23846359  | 23846474  | - | 0 | 116  | 46      | Intergenic        |          |  |       |             |                       |                    |
| CONGO_chr4_024083096_90_m0   | chr4 | 24083096  | 24083185  | - | 0 | 90   | 7.1     | Intergenic        |          |  | 1     |             | NovelUnspliced        |                    |
| CONGO_chr4_024147975_99_m0   | chr4 | 24147975  | 24148073  | - | 0 | 99   | 163.48  | UTR               |          |  | 1     | TU961       | SpliceToPCG           | ENSG00000109606    |
| CONGO_chr4_024341118_63_p2   | chr4 | 24341118  | 24341180  | - | 2 | 63   | 21.54   | Intergenic        |          |  |       |             |                       |                    |
| CONGO_chr4_025774303_32_p0   | chr4 | 25774303  | 25774334  | - | 0 | 32   | 95.2    | Intergenic        |          |  | 1     | TU962       | SpliceToPCG           | OTTHUMG00000097793 |
| CONGO_chr4_030397447_70_p0   | chr4 | 30397447  | 30397516  | - | 0 | 70   | 1.02    | Intron            |          |  |       |             | SpliceToPCG           | ENSG00000169851    |
| CONGO_chr4_030560840_89_p2   | chr4 | 30560840  | 30560928  | - | 2 | 89   | 116.14  | Intron            |          |  | 1     | TU964       | SpliceToPCG           | ENSG00000169851    |
| CONGO_chr4_035959776_208_p0  | chr4 | 35959776  | 35959983  | - | 0 | 208  | 501.72  | UTR               |          |  | 1     |             | UnsplicedMergeWithPCG | ENSG00000197057    |
| CONGO_chr4_038351775_81_m0   | chr4 | 38351775  | 38351855  | - | 0 | 81   | 2.73    | AntisenseIntron   |          |  |       |             |                       |                    |
| CONGO_chr4_041444983_107_m0  | chr4 | 41444983  | 41445089  | - | 0 | 107  | 57.78   | Intron            |          |  |       |             |                       |                    |
| CONGO_chr4_041554195_143_m0  | chr4 | 41554195  | 41554337  | - | 0 | 143  | 15.92   | Intergenic        |          |  |       |             |                       |                    |
| CONGO_chr4_041554379_152_p2  | chr4 | 41554379  | 41554530  | - | 2 | 152  | 61.53   | Intergenic        |          |  |       |             |                       |                    |
| CONGO_chr4_041569824_152_m2  | chr4 | 41569824  | 41569975  | - | 2 | 152  | 19.76   | Intergenic        |          |  |       | TU965       | NovelMultiExon        |                    |
| CONGO_chr4_046643817_83_p2   | chr4 | 46643817  | 46643899  | + | 2 | 83   | 23.26   | AntisenseIntron   |          |  |       |             |                       |                    |
| CONGO_chr4_048091319_109_p0  | chr4 | 48091319  | 48091427  | + | 0 | 109  | 149.94  | Intron            |          |  | 1     | TU966       | SpliceToPCG           | ENSG00000109171    |
| CONGO_chr4_048295603_45_m0   | chr4 | 48295603  | 48295647  | - | 0 | 45   | 175.21  | Intron            |          |  |       | TU967       | SpliceToPCG           | ENSG00000075539    |
| CONGO_chr4_052555772_67_p2   | chr4 | 52555772  | 52555838  | - | 2 | 67   | 217.43  | AntisenseCDS      |          |  |       |             | UnsplicedMergeWithPCG | ENSG00000188993    |
| CONGO_chr4_056380950_121_p0  | chr4 | 56380950  | 56381070  | + | 0 | 121  | 641.96  | UTR               |          |  | 1     | TU968       | Nov                   |                    |











|                             |      |           |           |   |   |     |         |                   |   |         |  |        |                       |                       |                  |
|-----------------------------|------|-----------|-----------|---|---|-----|---------|-------------------|---|---------|--|--------|-----------------------|-----------------------|------------------|
| CONGO_chr7_150894633_86_m0  | chr7 | 150894633 | 150894718 | - | 0 | 86  | 77.11   | Intron            |   |         |  | TU1140 | SpliceToPCG           | ENSG00000106617       |                  |
| CONGO_chr7_152739285_450_m0 | chr7 | 152739285 | 152739734 | - | 0 | 450 | 294.36  | NCExon            | 1 | rve     |  |        |                       |                       |                  |
| CONGO_chr7_153512591_53_p2  | chr7 | 153512591 | 153512643 | + | 2 | 53  | 47.28   | Intron            |   |         |  |        |                       |                       |                  |
| CONGO_chr7_155031287_113_m2 | chr7 | 155031287 | 155031399 | - | 2 | 113 | 452.98  | Intergenic        |   |         |  |        |                       |                       |                  |
| CONGO_chr7_156856219_105_p2 | chr7 | 156856219 | 156856323 | + | 2 | 105 | 140.46  | NCExon            |   |         |  | 1      |                       |                       |                  |
| CONGO_chr7_156857602_174_p2 | chr7 | 156857602 | 156857775 | + | 2 | 174 | 724.21  | NCExon            |   |         |  |        | UnsplicedMergeWithPCG | ENSG00000105993       |                  |
| CONGO_chr7_158242784_102_m0 | chr7 | 158242784 | 158242885 | - | 0 | 102 | 39.02   | Intron            |   |         |  | TU1141 | SpliceToPCG           | ENSG00000117868       |                  |
| CONGO_chr8_001196258_33_p2  | chr8 | 1196258   | 1196290   | + | 2 | 33  | 312.86  | Intergenic        |   |         |  | 1      | TU318                 | SpliceToPCG           | ENSG000001198010 |
| CONGO_chr8_001436939_66_p2  | chr8 | 1436939   | 1437004   | + | 2 | 66  | 347.56  | UTR               |   |         |  | 1      | TU318                 | SpliceToPCG           | ENSG000001198010 |
| CONGO_chr8_008614331_120_m2 | chr8 | 8614331   | 8614450   | - | 2 | 120 | 56.74   | Intergenic        |   |         |  |        |                       |                       |                  |
| CONGO_chr8_009510405_66_p0  | chr8 | 9510405   | 9510470   | + | 0 | 66  | 73.87   | Intron            |   |         |  |        |                       |                       |                  |
| CONGO_chr8_010369779_198_m1 | chr8 | 10369779  | 10369976  | - | 1 | 198 | 487.16  | Intergenic        |   | Trypsin |  |        |                       |                       |                  |
| CONGO_chr8_010391281_106_m0 | chr8 | 10391281  | 10391386  | - | 0 | 106 | 604.47  | NCIntron          |   |         |  |        |                       |                       |                  |
| CONGO_chr8_010391555_123_m0 | chr8 | 10391555  | 10391677  | - | 0 | 123 | 368.63  | NCIntron          |   |         |  |        |                       |                       |                  |
| CONGO_chr8_010392632_260_m1 | chr8 | 10392632  | 10392891  | - | 1 | 260 | 1162.39 | NCExon            |   |         |  |        |                       |                       |                  |
| CONGO_chr8_010393536_193_m2 | chr8 | 10393536  | 10393728  | - | 2 | 193 | 1205.48 | NCExon            |   |         |  |        |                       |                       |                  |
| CONGO_chr8_010505352_97_p1  | chr8 | 10505352  | 10505448  | + | 1 | 97  | 516.64  | AntisenseCDS      |   |         |  |        |                       |                       |                  |
| CONGO_chr8_010506112_73_p0  | chr8 | 10506112  | 10506184  | - | 0 | 73  | 39.78   | AntisenseCDS      |   |         |  |        |                       |                       |                  |
| CONGO_chr8_011257814_76_m2  | chr8 | 11257814  | 11257889  | - | 2 | 76  | 357.84  | AntisenseCDS      |   |         |  |        |                       |                       |                  |
| CONGO_chr8_011260502_140_p2 | chr8 | 11260502  | 11260641  | + | 2 | 140 | 995.78  | UTR               |   |         |  | 1      |                       | UnsplicedMergeWithPCG | ENSG00000154316  |
| CONGO_chr8_011614151_40_p2  | chr8 | 11614151  | 11614190  | + | 2 | 40  | 62.4    |                   |   |         |  |        |                       | NovelUnspliced        |                  |
| CONGO_chr8_018985996_92_m2  | chr8 | 18985996  | 18986087  | - | 2 | 92  | 174.51  | Intergenic        |   |         |  | 1      |                       |                       |                  |
| CONGO_chr8_019750953_78_p1  | chr8 | 19750953  | 19751030  | + | 1 | 78  | 227.55  | Intron            |   |         |  | 1      | TU1142                | SpliceToPCG           | ENSG00000104613  |
| CONGO_chr8_021902180_111_p0 | chr8 | 21902180  | 21902290  | + | 0 | 111 | 99.06   | Intron            |   |         |  | 1      | TU1143                | SpliceToPCG           | ENSG00000130227  |
| CONGO_chr8_022752260_122_p2 | chr8 | 22752260  | 22752381  | + | 2 | 122 | 29.28   | AntisenseIntron   |   |         |  |        |                       |                       |                  |
| CONGO_chr8_024266319_63_p0  | chr8 | 24266319  | 24266381  | + | 0 | 63  | 316.83  | Intron            |   |         |  |        |                       | NovelUnspliced        |                  |
| CONGO_chr8_025497994_80_m2  | chr8 | 25497994  | 25498073  | - | 2 | 80  | 52.32   | AntisenseIntron   |   |         |  |        |                       |                       |                  |
| CONGO_chr8_025559110_91_m1  | chr8 | 25559110  | 25559200  | - | 1 | 91  | 104.07  | AntisenseIntron   |   |         |  |        |                       |                       |                  |
| CONGO_chr8_025845963_186_m0 | chr8 | 25845963  | 25846148  | - | 0 | 186 | 86.35   | Intron            |   |         |  |        |                       |                       |                  |
| CONGO_chr8_025851506_150_p0 | chr8 | 25851506  | 25851655  | + | 0 | 150 | 9.32    | Intron            |   |         |  |        |                       |                       |                  |
| CONGO_chr8_026205141_44_p0  | chr8 | 26205141  | 26205184  | + | 0 | 44  | 57.02   | UTR               |   |         |  | 1      | TU1144                | SpliceToPCG           | ENSG00000221914  |
| CONGO_chr8_027152660_54_m1  | chr8 | 27152660  | 27152713  | - | 1 | 54  | 60.91   | Intron            |   |         |  | 1      | TU1145                | SpliceToPCG           | ENSG00000015592  |
| CONGO_chr8_030533717_141_p0 | chr8 | 30533717  | 30533857  | + | 0 | 141 | 21.37   | Intron            |   |         |  | 1      | TU1147                | SpliceToPCG           | ENSG00000157110  |
| CONGO_chr8_030622369_288_p0 | chr8 | 30622369  | 30622656  | + | 0 | 288 | 1986.82 | AntisenseIntron   |   |         |  | 1      | TU1148                | NovelMultiExon        |                  |
| CONGO_chr8_031008801_152_p0 | chr8 | 31008801  | 31008952  | + | 0 | 152 | 120.78  | AntisenseCDS      |   |         |  |        |                       |                       |                  |
| CONGO_chr8_031163631_127_p0 | chr8 | 31163631  | 31164489  | + | 0 | 127 | 136.99  | Intergenic        |   |         |  |        |                       |                       |                  |
| CONGO_chr8_032624263_147_p0 | chr8 | 32624263  | 32624409  | + | 0 | 147 | 458.87  | UTR               |   |         |  |        |                       |                       |                  |
| CONGO_chr8_037050370_80_m2  | chr8 | 37050370  | 37050449  | - | 2 | 80  | 32.8    | Intergenic        |   |         |  | 1      |                       | UnsplicedMergeWithPCG | ENSG00000157168  |
| CONGO_chr8_03724523_84_p0   | chr8 | 3724523   | 3724606   | + | 0 | 84  | 41.08   | Intergenic        |   |         |  |        |                       |                       |                  |
| CONGO_chr8_037302641_173_m2 | chr8 | 37302641  | 37302813  | - | 2 | 173 | 1.21    | Intergenic        |   |         |  |        |                       | NovelUnspliced        |                  |
| CONGO_chr8_037306477_132_p0 | chr8 | 37306477  | 37306608  | + | 0 | 132 | 10.81   | Intergenic        |   |         |  |        |                       |                       |                  |
| CONGO_chr8_037456127_162_p0 | chr8 | 37456127  | 37456288  | + | 0 | 162 | 21.37   | Intergenic        |   |         |  |        |                       |                       |                  |
| CONGO_chr8_037542570_148_m1 | chr8 | 37542570  | 37542717  | - | 1 | 148 | 113.33  | Intergenic        |   |         |  |        |                       |                       |                  |
| CONGO_chr8_037614885_124_p1 | chr8 | 37614885  | 37615008  | + | 1 | 124 | 71.69   | Intergenic        |   |         |  |        |                       |                       |                  |
| CONGO_chr8_039513190_167_p0 | chr8 | 39513190  | 39513356  | + | 0 | 167 | 178.17  | Intergenic        |   |         |  |        |                       |                       |                  |
| CONGO_chr8_041286119_164_m1 | chr8 | 41286119  | 41286282  | - | 1 | 164 | 29.06   | UTR               |   |         |  | 1      | TU1149                | SpliceToPCG           | ENSG00000104332  |
| CONGO_chr8_041744017_77_m2  | chr8 | 41744017  | 41744093  | - | 2 | 77  | 10.25   | Intron            |   |         |  |        |                       |                       |                  |
| CONGO_chr8_041744310_102_m2 | chr8 | 41744310  | 41744411  | - | 2 | 102 | 9.78    | Intron            |   |         |  |        |                       |                       |                  |
| CONGO_chr8_049067001_310_m1 | chr8 | 49067001  | 49067310  | - | 1 | 310 | 89.86   | Intergenic        |   |         |  |        |                       |                       |                  |
| CONGO_chr8_049067385_281_m2 | chr8 | 49067385  | 49067665  | - | 2 | 281 | 473.33  | Intergenic        |   | rve     |  |        |                       |                       |                  |
| CONGO_chr8_053300789_105_m0 | chr8 | 53300789  | 53300893  | - | 0 | 105 | 37      | Intron            |   |         |  |        |                       |                       |                  |
| CONGO_chr8_053324471_173_m0 | chr8 | 53324471  | 53324643  | - | 0 | 173 | 91.06   | Intron            |   |         |  |        |                       |                       |                  |
| CONGO_chr8_053329363_114_m2 | chr8 | 53329363  | 53329476  | - | 2 | 114 | 36.55   | UTR               |   |         |  | 1      |                       |                       |                  |
| CONGO_chr8_053329654_120_p0 | chr8 | 53329654  | 53329773  | + | 0 | 120 | 0.15    | AntisenseIntron   |   |         |  |        |                       |                       |                  |
| CONGO_chr8_053330042_106_p1 | chr8 | 53330042  | 53330147  | + | 1 | 106 | 93.77   | AntisenseIntron   |   |         |  |        |                       |                       |                  |
| CONGO_chr8_053484476_90_m0  | chr8 | 53484476  | 53484565  | - | 0 | 90  | 67.87   | UTR               |   |         |  | 1      | TU1150                | SpliceToPCG           | ENSG00000147488  |
| CONGO_chr8_053404323_75_m0  | chr8 | 53404323  | 53404397  | - | 0 | 75  | 399.15  | UTR               |   |         |  | 1      |                       | UnsplicedMergeWithPCG | ENSG00000082556  |
| CONGO_chr8_055253685_68_m0  | chr8 | 55253685  | 55253752  | - | 0 | 68  | 38.12   | Intergenic        |   |         |  |        |                       |                       |                  |
| CONGO_chr8_055858661_164_p2 | chr8 | 55858661  | 55858824  | + | 2 | 164 | 808.67  | Intergenic        |   |         |  | 1      | TU320                 | NovelMultiExon        |                  |
| CONGO_chr8_055912564_220_p0 | chr8 | 55912564  | 55912783  | + | 0 | 220 | 261.26  | Intergenic        |   |         |  | 1      | TU320                 | NovelMultiExon        |                  |
| CONGO_chr8_055927730_113_p2 | chr8 | 55927730  | 55927842  | + | 2 | 113 | 308.47  | Intergenic        |   |         |  | 1      | TU83                  | NovelMultiExon        |                  |
| CONGO_chr8_055932142_79_p0  | chr8 | 55932142  | 55932200  | + | 0 | 79  | 214.52  | Intergenic        |   |         |  | 1      | TU83                  | NovelMultiExon        |                  |
| CONGO_chr8_055940949_82_p2  | chr8 | 55940949  | 55941030  | + | 2 | 82  | 244.63  | Intergenic        |   |         |  | 1      | TU83                  | NovelMultiExon        |                  |
| CONGO_chr8_055944957_56_p1  | chr8 | 55944957  | 55945012  | + | 1 | 56  | 226.4   | Intergenic        |   |         |  | 1      | TU83                  | NovelMultiExon        |                  |
| CONGO_chr8_057237437_133_m1 | chr8 | 57237437  | 57237569  | - | 1 | 133 | 63.98   | UTR               |   |         |  | 1      |                       | UnsplicedMergeWithPCG | ENSG00000181690  |
| CONGO_chr8_061867981_292_m2 | chr8 | 61867981  | 61868272  | - | 2 | 292 | 116.12  | AntisenseIntron   |   |         |  |        |                       |                       |                  |
| CONGO_chr8_062092023_116_m2 | chr8 | 62092023  | 62092138  | - | 2 | 116 | 84.2    | Intergenic        |   |         |  |        |                       |                       |                  |
| CONGO_chr8_064029015_71_p2  | chr8 | 64029015  | 64029085  | + | 2 | 71  | 112.7   | Intron            |   |         |  |        |                       |                       |                  |
| CONGO_chr8_065342115_109_p0 | chr8 | 65342115  | 65342223  | + | 0 | 109 | 73.16   | Intergenic        |   |         |  |        | TU1151                | NovelMultiExon        |                  |
| CONGO_chr8_065345457_121_p1 | chr8 | 65345457  | 65345577  | + | 1 | 121 | 130.95  | Intergenic        |   |         |  |        |                       |                       |                  |
| CONGO_chr8_065680628_94_p1  | chr8 | 65680628  | 65680721  | + | 1 | 94  | 3.11    | AntisenseIntron   |   |         |  |        |                       |                       |                  |
| CONGO_chr8_066220109_150_m0 | chr8 | 66220109  | 66220258  | - | 0 | 150 | 9.74    | Intergenic        |   |         |  |        |                       |                       |                  |
| CONGO_chr8_066263134_160_p1 | chr8 | 66263134  | 66263293  | + | 1 | 160 | 59.21   | Intergenic        |   |         |  |        |                       |                       |                  |
| CONGO_chr8_068022840_114_m0 | chr8 | 68022840  | 68022953  | - | 0 | 114 | 295.9   | Intergenic        |   |         |  | 1      |                       | NovelUnspliced        |                  |
| CONGO_chr8_069993288_60_m0  | chr8 | 69993288  | 69993347  | - | 0 | 60  | 15.47   | NCIntron          |   |         |  |        |                       |                       |                  |
| CONGO_chr8_073195300_290_p2 | chr8 | 73195300  | 73195589  | + | 2 | 290 | 41.07   | Intergenic        |   |         |  |        |                       |                       |                  |
| CONGO_chr8_076728512_69_p2  | chr8 | 76728512  | 76728580  | + | 2 | 69  | 78.46   | Intergenic        |   | Gag_p30 |  |        |                       |                       |                  |
| CONGO_chr8_076912656_46_p0  | chr8 | 76912656  | 76912701  | + | 0 | 46  | 20      | Intergenic        |   |         |  |        |                       |                       |                  |
| CONGO_chr8_077603344_78_p0  | chr8 | 77603344  | 77603421  | + | 0 | 78  | 20.73   | Intergenic        |   |         |  |        |                       |                       |                  |
| CONGO_chr8_077654112_81_p1  | chr8 | 77654112  | 77654192  | + | 1 | 81  | 40.7    | Intergenic        |   |         |  |        |                       |                       |                  |
| CONGO_chr8_07765496_176_p2  | chr8 | 7765496   | 77656671  | + | 2 | 176 | 31.87   | Intergenic        |   |         |  |        |                       |                       |                  |
| CONGO_chr8_077745032_36_p1  | chr8 | 77745032  | 77745067  | + | 1 | 36  | 26.99   | AntisenseNCIntron |   |         |  |        |                       |                       |                  |
| CONGO_chr8_077747617_148_m1 | chr8 | 77747617  | 77747764  | - | 1 | 148 | 155     | NCExon            |   |         |  | 1      | TU1152                | NovelMultiExon        |                  |
| CONGO_chr8_077758530_216_p1 | chr8 | 77758530  | 77758745  | + | 1 | 216 | 93.6    | Intron            |   |         |  |        |                       |                       |                  |
| CONGO_chr8_077759816_93_p0  | chr8 | 77759816  | 77759908  | - | 0 | 93  | 69.24   | Intron            |   |         |  |        |                       |                       |                  |
| CONGO_chr8_077761991_74_m0  | chr8 | 77761991  | 77762064  | - | 0 | 74  | 116.91  | AntisenseIntron   |   |         |  |        |                       |                       |                  |
| CONGO_chr8_077773689_51_p2  | chr8 | 77773689  | 77773739  | + | 2 | 51  | 15.66   | Intron            |   |         |  |        |                       |                       |                  |
| CONGO_chr8_077778818_211_m1 | chr8 | 77778818  | 77779028  | - | 1 | 211 | 244.19  | AntisenseCDS      |   |         |  |        |                       |                       |                  |
| CONGO_chr8_077876958_180_p1 | chr8 | 77876958  | 77877137  | + | 1 | 180 | 24.59   | Intron            |   |         |  |        |                       |                       |                  |
| CONGO_chr8_077940137_85_p2  | chr8 | 77940137  | 77940221  | + | 2 | 85  | 35.33   | UTR               |   |         |  | 1      | TU1153                | SpliceToPCG           | ENSG00000091656  |
| CONGO_chr8_078984487_143_m2 | chr8 | 78984487  | 78984629  | - | 2 | 143 | 28.08   | Intergenic        |   |         |  |        |                       |                       |                  |
| CONGO_chr8_079721867_168_p0 | chr8 | 79721867  | 79722034  | + | 0 | 168 | 293.66  | Intergenic        |   |         |  |        |                       |                       |                  |
| CONGO_chr8_081948334_469_m1 | chr8 | 81948334  | 81948802  | - | 1 | 469 | 521.59  | Intron            |   |         |  |        |                       |                       |                  |









**Table S6. Basic statistics on motif instances**

| Confidence | # of motifs reaching confidence | Total # of instances | # of examined bases covered | # of TFs with a motif reaching confidence | Total # of instances (best motif per TF) |
|------------|---------------------------------|----------------------|-----------------------------|-------------------------------------------|------------------------------------------|
| 0.0        | 630                             | 55,021,406           | 80.6                        | 335                                       | 35,366,716                               |
| 0.1        | 540                             | 15,817,545           | 45.3                        | 294                                       | 11,181,918                               |
| 0.2        | 492                             | 8,385,913            | 26.0                        | 270                                       | 6,068,955                                |
| 0.3        | 435                             | 4,697,272            | 14.3                        | 252                                       | 3,495,271                                |
| 0.4        | 375                             | 2,675,802            | 7.7                         | 225                                       | 2,050,302                                |
| 0.5        | 293                             | 1,449,752            | 3.9                         | 188                                       | 1,175,237                                |
| 0.6        | 216                             | 707,141              | 1.7                         | 151                                       | 595,984                                  |
| 0.7        | 129                             | 269,944              | 0.6                         | 101                                       | 240,849                                  |
| 0.8        | 56                              | 90,464               | 0.2                         | 45                                        | 80,138                                   |
| 0.9        | 16                              | 33,822               | 0.1                         | 14                                        | 29,080                                   |

**Table S7. Listing of data sets and motifs used in analysis**

| Factor | Cell type                              | Technology                           | Num peaks                | Motif used      | Citation                        |
|--------|----------------------------------------|--------------------------------------|--------------------------|-----------------|---------------------------------|
| CTCF   | CD4+ T cells<br>Embryonic stem (mouse) | Sequencing                           | 21,544<br>8,546 (+mouse) | Jaspar MA0139.1 | 17512414<br>bern, unpub (mouse) |
| ER     | MCF-7 breast cancer                    | Paired-end Tags                      | 1,229                    | Transfac M00191 | 17542648                        |
| Fos    | K562 CML                               | Sequencing                           | 18,963                   | Transfac M00926 | 20139302                        |
| FOXA2  | Liver                                  | Promoter array                       | 143<br>19 (+mouse)       | Jaspar MA0047.2 | 17529977                        |
| HNF1   | Liver                                  | Promoter array                       | 246<br>23 (+mouse)       | Jaspar MA0046.1 | 17529977                        |
| HNF4   | Liver                                  | Promoter array                       | 1,231<br>99 (+mouse)     | Transfac M01036 | 17529977                        |
| HNF6   | Liver                                  | Promoter array                       | 149<br>20 (+mouse)       | Transfac M00639 | 17529977                        |
| Myc    | K562 CML<br>Embryonic stem (mouse)     | Sequencing<br>Promoter array (mouse) | 15,749<br>2,399 (+mouse) | Transfac M00187 | 20139302<br>18358816 (mouse)    |
| NF-κB  | GM12878 B-Lymphocyte                   | Sequencing                           | 38,559                   | Jaspar MA0061.1 | 20299548                        |
| NRSF   | Jurkat T cell line                     | Sequencing                           | 1,931                    | Transfac M00325 | 17540862                        |
| p53    | HCT116 colon cancer                    | Paired-end Tags                      | 62,939                   | Transfac M00034 | 16413492                        |
| STAT1  | HeLa S3 cells                          | Sequencing                           | 41,530                   | Transfac M00224 | 17558387                        |
| YY1    | NT2/D1                                 | Sequencing                           | 11,018                   | Transfac M00651 | Encode, unpub                   |

**Table S8. Coincidence of GWAS results with TSS-distal noncoding conserved elements**

|                                |                 | Noncoding TSS-distal genome | Noncoding TSS-distal Hapmap CEU SNPs |
|--------------------------------|-----------------|-----------------------------|--------------------------------------|
| All callable positions         | <i>n</i>        | 1996107874                  | 3464198                              |
| Conserved by SiPhy- $\omega$   | <i>n</i>        | 88530563                    | 138260                               |
| GWAS hit in at least one study | <i>n</i>        | 3402                        | 3390                                 |
| <b>Conserved GWAS</b>          | <i>n</i>        | 187                         | 186                                  |
|                                | fold enrichment | 1.24                        | 1.37                                 |
|                                | <i>p</i>        | $1.6 \times 10^{-3}$        | $9.8 \times 10^{-6}$                 |

**Table S9. Summary of sitewise selective pressures**

| Data set       | N sites   | dN/dS<br><0.5 | dN/dS<br><1 | dN/dS<br>>1 | dN/dS<br>>1.5 | Domain<br>instances | Domain<br>types | Genes  | Positive<br>domain<br>instances | Positive<br>domain<br>types | Positive<br>genes | Positive<br>sites | Fraction<br>positive<br>sites |
|----------------|-----------|---------------|-------------|-------------|---------------|---------------------|-----------------|--------|---------------------------------|-----------------------------|-------------------|-------------------|-------------------------------|
| Mammals        | 6,050,046 | 84%           | 94%         | 6%          | 2%            | 26,667              | 3,117           | 12,871 | 1,451                           | 871                         | 4,431             | 15,381            | 0.25423%                      |
| Primates       | 6,386,902 | 86%           | 91%         | 9%          | 6%            | 27,441              | 3,164           | 12,968 | 7                               | 7                           | 17                | 19                | 0.00030%                      |
| Glires         | 6,335,182 | 88%           | 95%         | 5%          | 2%            | 27,671              | 3,168           | 13,068 | 8                               | 6                           | 23                | 27                | 0.00043%                      |
| Laurasiatheria | 6,313,057 | 85%           | 94%         | 6%          | 3%            | 27,120              | 3,146           | 12,860 | 89                              | 77                          | 369               | 468               | 0.00741%                      |

**Table S10. Simulation results for the power of site-wise analysis using three different mammalian trees**

| Tree            | Indel rate | Spearman's rank correlation between inferred/true dN/dS | TPR at FDR <0.1 | TP at FDR <0.1 | TP at FDR <0.05 | TPR at FDR <0.05 | FPR at SLR default threshold | TP at SLR default threshold | FP at SLR default threshold | FDR at SLR default threshold |
|-----------------|------------|---------------------------------------------------------|-----------------|----------------|-----------------|------------------|------------------------------|-----------------------------|-----------------------------|------------------------------|
| 29 Eutherian    | 0          | 0.942                                                   | 0.66400         | 3760           | 2990            | 0.528            | 0.00137                      | 2900                        | 0.00137                     | 0.0423                       |
| 9 high-coverage | 0          | 0.849                                                   | 0.13700         | 782            | 429             | 0.075            | 0.00248                      | 1419                        | 0.00248                     | 0.1400                       |
| HMRD            | 0          | 0.749                                                   | 0.00942         | 50             | 10              | 0.002            | 0.00538                      | 802                         | 0.00538                     | 0.3860                       |
| 29 Eutherian    | 0.05       | 0.831                                                   | 0.43800         | 2433           | 1686            | 0.304            | 0.00176                      | 2006                        | 0.00176                     | 0.0764                       |
| 9 high-coverage | 0.05       | 0.696                                                   | 0.01760         | 98             | 86              | 0.015            | 0.00340                      | 938                         | 0.00340                     | 0.2530                       |
| HMRD            | 0.05       | 0.570                                                   | 0.00000         | NA             | NA              | NA               | 0.00464                      | 412                         | 0.00464                     | 0.5160                       |



Table S11. Summaries of site-wise data in regions of high and low recombination rate, GC content, and evidence for non-neutral evolution

| Variable                             | Quantile range | Low value | High value | Number of sites | Mean dN/dS | Mean signed LRT | Mean male recombination | Mean female recombination | Mean sex-averaged recombination | Fraction of sites under positive selection | GC content (10-kb window) |
|--------------------------------------|----------------|-----------|------------|-----------------|------------|-----------------|-------------------------|---------------------------|---------------------------------|--------------------------------------------|---------------------------|
| <b>LRT Statistic</b>                 |                |           |            |                 |            |                 |                         |                           |                                 |                                            |                           |
| signed_lrt                           | 0-0.01         | -188.187  | -44.199    | 57,981          | 0.006      | -50.660         | 1.522                   | 1.812                     | 1.681                           | 0.00000                                    | 0.512                     |
| signed_lrt                           | 0.01-0.25      | -44.199   | -19.594    | 1,391,549       | 0.015      | -26.806         | 1.128                   | 1.734                     | 1.445                           | 0.00000                                    | 0.475                     |
| signed_lrt                           | 0.25-0.5       | -19.594   | -12.030    | 1,449,530       | 0.040      | -15.607         | 0.971                   | 1.657                     | 1.333                           | 0.00000                                    | 0.455                     |
| signed_lrt                           | 0.5-0.75       | -12.030   | -4.926     | 1,449,521       | 0.128      | -8.575          | 0.929                   | 1.613                     | 1.294                           | 0.00000                                    | 0.451                     |
| signed_lrt                           | 0.75-0.99      | -4.926    | 3.648      | 1,391,529       | 0.694      | -1.505          | 0.921                   | 1.619                     | 1.293                           | 0.01338                                    | 0.454                     |
| signed_lrt                           | 0.99-1         | 3.648     | 108.850    | 57,970          | 2.984      | 8.208           | 0.879                   | 1.614                     | 1.272                           | 1.00000                                    | 0.454                     |
| <b>Male Recombination</b>            |                |           |            |                 |            |                 |                         |                           |                                 |                                            |                           |
| recomb_m                             | 0-0.01         | -0.010    | 0.000      | 743,415         | 0.265      | -12.265         | 0.000                   | 0.991                     | 0.648                           | 0.01539                                    | 0.468                     |
| recomb_m                             | 0.01-0.25      | 0.000     | 0.214      | 707,759         | 0.249      | -12.617         | 0.102                   | 1.192                     | 0.647                           | 0.01364                                    | 0.450                     |
| recomb_m                             | 0.25-0.5       | 0.214     | 0.591      | 1,448,727       | 0.243      | -12.865         | 0.414                   | 1.469                     | 0.942                           | 0.01375                                    | 0.446                     |
| recomb_m                             | 0.5-0.75       | 0.591     | 1.275      | 1,448,935       | 0.236      | -13.168         | 0.882                   | 1.809                     | 1.345                           | 0.01278                                    | 0.447                     |
| recomb_m                             | 0.75-0.99      | 1.275     | 6.107      | 1,393,462       | 0.233      | -14.509         | 2.402                   | 2.288                     | 2.345                           | 0.01187                                    | 0.483                     |
| recomb_m                             | 0.99-1         | 6.107     | 10.372     | 55,782          | 0.206      | -16.616         | 8.010                   | 1.562                     | 4.787                           | 0.00932                                    | 0.540                     |
| <b>GC Content</b>                    |                |           |            |                 |            |                 |                         |                           |                                 |                                            |                           |
| gc                                   | 0-0.01         | 0.071     | 0.332      | 58,204          | 0.233      | -11.474         | 0.563                   | 1.269                     | 0.929                           | 0.01347                                    | 0.322                     |
| gc                                   | 0.01-0.25      | 0.332     | 0.395      | 1,392,861       | 0.233      | -11.936         | 0.750                   | 1.492                     | 1.141                           | 0.01260                                    | 0.369                     |
| gc                                   | 0.25-0.5       | 0.395     | 0.447      | 1,449,024       | 0.256      | -12.137         | 0.873                   | 1.698                     | 1.310                           | 0.01461                                    | 0.419                     |
| gc                                   | 0.5-0.75       | 0.447     | 0.521      | 1,449,980       | 0.254      | -13.575         | 0.987                   | 1.778                     | 1.402                           | 0.01438                                    | 0.483                     |
| gc                                   | 0.75-0.99      | 0.521     | 0.644      | 1,390,064       | 0.225      | -15.376         | 1.328                   | 1.704                     | 1.532                           | 0.01125                                    | 0.564                     |
| gc                                   | 0.99-1         | 0.644     | 0.706      | 57,947          | 0.225      | -16.780         | 2.147                   | 0.775                     | 1.466                           | 0.01034                                    | 0.660                     |
| <b>High GC, Male Recombination</b>   |                |           |            |                 |            |                 |                         |                           |                                 |                                            |                           |
| recomb_m                             | 0-0.01         | -0.010    | 0.000      | 98,083          | 0.230      | -15.273         | 0.000                   | 0.583                     | 0.379                           | 0.01139                                    | 0.608                     |
| recomb_m                             | 0.01-0.25      | 0.000     | 0.242      | 47,884          | 0.207      | -15.997         | 0.084                   | 1.313                     | 0.700                           | 0.00892                                    | 0.593                     |
| recomb_m                             | 0.25-0.5       | 0.242     | 0.987      | 151,389         | 0.196      | -16.185         | 0.648                   | 1.544                     | 1.096                           | 0.00816                                    | 0.599                     |
| recomb_m                             | 0.5-0.75       | 0.987     | 2.081      | 139,459         | 0.209      | -16.277         | 1.532                   | 1.825                     | 1.678                           | 0.00994                                    | 0.604                     |
| recomb_m                             | 0.75-0.99      | 2.081     | 8.735      | 141,879         | 0.202      | -17.217         | 4.427                   | 1.632                     | 3.030                           | 0.00841                                    | 0.610                     |
| recomb_m                             | 0.99-1         | 8.735     | 10.372     | 2,811           | 0.348      | -11.262         | 9.690                   | 2.961                     | 6.330                           | 0.03380                                    | 0.585                     |
| <b>High GC, Female Recombination</b> |                |           |            |                 |            |                 |                         |                           |                                 |                                            |                           |
| recomb_f                             | 0-0.01         | -0.010    | 0.000      | 87,934          | 0.249      | -15.971         | 0.698                   | 0.000                     | 0.349                           | 0.01273                                    | 0.618                     |
| recomb_f                             | 0.01-0.25      | 0.000     | 0.415      | 57,495          | 0.205      | -16.672         | 2.991                   | 0.211                     | 1.602                           | 0.00990                                    | 0.609                     |
| recomb_f                             | 0.25-0.5       | 0.415     | 1.323      | 145,697         | 0.198      | -16.101         | 1.632                   | 0.771                     | 1.202                           | 0.00800                                    | 0.608                     |
| recomb_f                             | 0.5-0.75       | 1.323     | 2.339      | 145,206         | 0.207      | -15.733         | 1.171                   | 1.784                     | 1.529                           | 0.00916                                    | 0.596                     |
| recomb_f                             | 0.75-0.99      | 2.339     | 4.801      | 139,831         | 0.197      | -16.924         | 2.309                   | 3.095                     | 2.705                           | 0.00891                                    | 0.597                     |
| recomb_f                             | 0.99-1         | 4.801     | 8.041      | 5,342           | 0.164      | -18.475         | 1.319                   | 5.943                     | 3.734                           | 0.00449                                    | 0.590                     |

**Table S12. GO enrichments for codon-wise and gene-wise positively selected genes**

| GO.ID                                                | Term                                        | GO term enrichments |             |          |         |           |           |           |
|------------------------------------------------------|---------------------------------------------|---------------------|-------------|----------|---------|-----------|-----------|-----------|
|                                                      |                                             | Annotated           | Significant | Expected | Rank in | pval.elim | pval.fis  | pval.elim |
| <b>ENRICHMENTS FOR CODON-WISE POSITIVE SELECTION</b> |                                             |                     |             |          |         |           |           |           |
| GO:0007018                                           | microtubule-based movement                  | 288                 | 89          | 44.54    | 1       | 0         | 0         | 0         |
| GO:0007026                                           | negative regulation of microtubule depol... | 60                  | 29          | 9.28     | 2       | 0         | 0         | 0         |
| GO:0006265                                           | DNA topological change                      | 65                  | 29          | 10.05    | 3       | 0         | 0         | 0         |
| GO:0000723                                           | telomere maintenance                        | 53                  | 23          | 8.2      | 4       | 0         | 0         | 0.01      |
| GO:0090161                                           | Golgi ribbon formation                      | 7                   | 7           | 1.08     | 5       | 0         | 0         | 0.01      |
| GO:0043044                                           | ATP-dependent chromatin remodeling          | 17                  | 11          | 2.63     | 6       | 0         | 0         | 0.03      |
| GO:0055114                                           | oxidation reduction                         | 1553                | 303         | 240.18   | 7       | 0         | 0         | 0.04      |
| GO:0055072                                           | iron ion homeostasis                        | 69                  | 27          | 10.67    | 50      | 0         | 0         | 0.01      |
| GO:0006974                                           | response to DNA damage stimulus             | 1023                | 212         | 158.21   | 66      | 0         | 0.01      | 0.02      |
| GO:0006259                                           | DNA metabolic process                       | 1523                | 311         | 235.54   | 153     | 0         | 0.03      | 0         |
| GO:0002460                                           | adaptive immune response based on somati... | 208                 | 66          | 32.17    | 347     | 0         | 0.1       | 0         |
| GO:0002250                                           | adaptive immune response                    | 211                 | 66          | 32.63    | 449     | 0         | 0.13      | 0         |
| GO:0032886                                           | regulation of microtubule-based process     | 124                 | 45          | 19.18    | 915     | 0         | 0.29      | 0         |
| GO:0002455                                           | humoral immune response mediated by circ... | 78                  | 29          | 12.06    | 918     | 0         | 0.3       | 0.01      |
| GO:0002443                                           | leukocyte mediated immunity                 | 269                 | 70          | 41.6     | 991     | 0         | 0.32      | 0.03      |
| GO:0070507                                           | regulation of microtubule cytoskeleton o... | 110                 | 42          | 17.01    | 1172    | 0         | 0.4       | 0         |
| GO:0007017                                           | microtubule-based process                   | 621                 | 166         | 96.04    | 1269    | 0         | 0.43      | 0         |
| GO:0043242                                           | negative regulation of protein complex d... | 97                  | 34          | 15       | 2085    | 0         | 0.69      | 0.01      |
| GO:0031110                                           | regulation of microtubule polymerization... | 75                  | 31          | 11.6     | 2086    | 0         | 0.7       | 0         |
| GO:0031109                                           | microtubule polymerization or depolymeri... | 86                  | 31          | 13.3     | 3065    | 0         | 0.93      | 0.01      |
| <b>ENRICHMENTS FOR GENE-WISE POSITIVE SELECTION</b>  |                                             |                     |             |          |         |           |           |           |
| GO:0045132                                           | meiotic chromosome segregation              | 29                  | 23          | 1.11     | 1       | 9.10E-028 | 9.10E-028 | 5.19E-024 |
| GO:0006355                                           | regulation of transcription, DNA-depende... | 4628                | 312         | 177.86   | 2       | 5.40E-024 | 5.40E-024 | 3.08E-020 |
| GO:0042742                                           | defense response to bacterium               | 186                 | 34          | 7.15     | 3       | 0         | 0         | 0         |
| GO:0006955                                           | immune response                             | 2043                | 168         | 78.52    | 4       | 8.30E-021 | 0         | 4.73E-017 |
| GO:0050909                                           | sensory perception of taste                 | 55                  | 20          | 2.11     | 5       | 6.10E-015 | 0         | 0         |
| GO:0007217                                           | tachykinin receptor signaling pathway       | 21                  | 11          | 0.81     | 6       | 0         | 0         | 0         |
| GO:0031103                                           | axon regeneration                           | 37                  | 13          | 1.42     | 7       | 0         | 0         | 0         |
| GO:0006526                                           | activation of transmembrane receptor pro... | 16                  | 9           | 0.61     | 8       | 0         | 0         | 0         |
| GO:0031640                                           | killing of cells of another organism        | 33                  | 12          | 1.27     | 9       | 0         | 0         | 0         |
| GO:0042523                                           | positive regulation of tyrosine phosphor... | 12                  | 8           | 0.46     | 10      | 0         | 0         | 0         |
| GO:0007566                                           | embryo implantation                         | 38                  | 12          | 1.46     | 11      | 0         | 0         | 0         |
| GO:0070257                                           | positive regulation of mucus secretion      | 7                   | 6           | 0.27     | 12      | 0         | 0         | 0         |
| GO:0006952                                           | defense response                            | 1246                | 138         | 47.89    | 13      | 4.20E-029 | 0         | 2.39E-025 |
| GO:0031424                                           | keratinization                              | 82                  | 16          | 3.15     | 14      | 0         | 0         | 0         |
| GO:0046080                                           | dUTP metabolic process                      | 5                   | 5           | 0.19     | 15      | 0         | 0         | 0         |
| GO:0006968                                           | cellular defense response                   | 115                 | 18          | 4.42     | 16      | 0         | 0         | 0         |
| GO:0006935                                           | chemotaxis                                  | 314                 | 36          | 12.07    | 17      | 0         | 0         | 0         |
| GO:0007171                                           | activation of transmembrane receptor pro... | 15                  | 7           | 0.58     | 18      | 0         | 0         | 0         |
| GO:0045651                                           | positive regulation of macrophage differ... | 11                  | 6           | 0.42     | 19      | 0         | 0         | 0.01      |
| GO:0045086                                           | positive regulation of interleukin-2 bio... | 17                  | 7           | 0.65     | 20      | 0         | 0         | 0.01      |

**Notes:** All terms were first sorted by 'pval.fis.bonf' (the Bonferroni-corrected p-value for enrichment) and a threshold of  $p < 0.05$  was applied. Terms were subsequently sorted by 'pval.elim' for display purposes. Terms mentioned in the text are in bold, and only the top 20 terms for each type of enrichment are shown.

29 Mammals  
Table S13

**Table S13. PFAM domain enrichment site-wise and gene-wise positively selected genes**

| Pfam ID                                              | Pfam link | Domain name               | Notes / description                                                                                     | Mammals mean dNdS |         |            |            |               |                   |                   |                  |            |
|------------------------------------------------------|-----------|---------------------------|---------------------------------------------------------------------------------------------------------|-------------------|---------|------------|------------|---------------|-------------------|-------------------|------------------|------------|
|                                                      |           |                           |                                                                                                         | N sites           | N genes | Pos. sites | Neg. sites | Neutral sites | Fraction positive | Fraction negative | Fraction neutral | Mean dN/dS |
| TOP DOMAINS BY FRACTION OF POSITIVELY SELECTED SITES |           |                           |                                                                                                         |                   |         |            |            |               |                   |                   |                  |            |
| PF03765                                              | PF03765   | CRAL/TRIO, n-terminus     | Comprises retinal-binding proteins and various transfer proteins                                        | 690               | 9       | 18         | 449        | 223           | 0.03              | 0.65              | 0.32             | 0.36       |
| PF00031                                              | PF00031   | Cystatin                  | Proteinase inhibitors, play role in protein degradation, bone remodeling, possibly antigen presentation | 1404              | 11      | 31         | 816        | 557           | 0.02              | 0.58              | 0.4              | 0.41       |
| PF06467                                              | PF06467   | MYM-type zinc finger      | Zinc finger in proteins associated with chromosomal translocations and myeloproliferative disorders     | 1594              | 6       | 31         | 909        | 654           | 0.02              | 0.57              | 0.41             | 0.42       |
| PF00048                                              | PF00048   | IL8                       | Immune response                                                                                         | 1218              | 17      | 23         | 633        | 562           | 0.02              | 0.52              | 0.46             | 0.46       |
| PF00957                                              | PF00957   | Synaptobrevin             | Membrane protein of neuronal synaptic vesicles                                                          | 600               | 9       | 11         | 294        | 295           | 0.02              | 0.49              | 0.49             | 0.41       |
| PF04103                                              | PF04103   | CD20-like family          | IgE Fc receptor subunit                                                                                 | 1649              | 12      | 30         | 845        | 774           | 0.02              | 0.51              | 0.47             | 0.46       |
| PF03645                                              | PF03645   | Tctex-1                   | Binds to rhodopsin, possible role in retinitis pigmentosa                                               | 596               | 6       | 10         | 375        | 211           | 0.02              | 0.63              | 0.35             | 0.59       |
| PF01105                                              | PF01105   | Emp24 / GOLD / p24 family | Major membrane components of COPI and COPII coated vesicles                                             | 1319              | 15      | 21         | 971        | 327           | 0.02              | 0.74              | 0.25             | 0.28       |
| PF05287                                              | PF05287   | PMG                       | Keratin-associated proteins                                                                             | 1024              | 6       | 16         | 203        | 805           | 0.02              | 0.2               | 0.79             | 0.74       |
| PF00025                                              | PF00025   | ADP-ribosylation factor   | Regulators of vesicle biogenesis                                                                        | 908               | 24      | 14         | 565        | 329           | 0.02              | 0.62              | 0.36             | 0.38       |
| TOP DOMAINS BY MEAN DN/DS                            |           |                           |                                                                                                         |                   |         |            |            |               |                   |                   |                  |            |
| PF05287                                              | PF05287   | PMG                       | Keratin-associated proteins                                                                             | 1024              | 6       | 16         | 203        | 805           | 0.02              | 0.2               | 0.79             | 0.74       |
| PF03645                                              | PF03645   | Tctex-1                   | Binds to rhodopsin, possible role in retinitis pigmentosa                                               | 596               | 6       | 10         | 375        | 211           | 0.02              | 0.63              | 0.35             | 0.59       |
| PF00048                                              | PF00048   | IL8                       | Immune response                                                                                         | 1218              | 17      | 23         | 633        | 562           | 0.02              | 0.52              | 0.46             | 0.46       |
| PF04103                                              | PF04103   | CD20                      |                                                                                                         | 1649              | 12      | 30         | 845        | 774           | 0.02              | 0.51              | 0.47             | 0.46       |
| PF00230                                              | PF00230   | MIP                       |                                                                                                         | 1734              | 10      | 26         | 991        | 717           | 0.01              | 0.57              | 0.41             | 0.42       |
| PF00095                                              | PF00095   | WAP                       | Milk whey component, protease-inhibitor                                                                 | 564               | 8       | 2          | 309        | 253           | 0                 | 0.55              | 0.45             | 0.42       |
| PF00711                                              | PF00711   | Beta defensin             |                                                                                                         | 687               | 13      | 7          | 399        | 281           | 0.01              | 0.58              | 0.41             | 0.42       |
| PF06467                                              | PF06467   | MYM-type zinc finger      |                                                                                                         | 1594              | 6       | 31         | 909        | 654           | 0.02              | 0.57              | 0.41             | 0.42       |
| PF01390                                              | PF01390   | SEA domain                | Sea urchin sperm protein, proteolytic activity                                                          | 1876              | 10      | 16         | 1012       | 848           | 0.01              | 0.54              | 0.45             | 0.41       |
| PF00957                                              | PF00957   | Synaptobrevin             |                                                                                                         | 600               | 9       | 11         | 294        | 295           | 0.02              | 0.49              | 0.49             | 0.41       |

**Notes:** Rows were sorted by either mean dN/dS or fraction of positive sites, and the top 10 domains for each set were retained. Those domains showing up in the top 10 on both lists were grayed out. Domains mentioned in the text are in bold.

**Table S14. Transcription factor binding sites**

| JASPAR family                 | Matrix ID | Min      | Max       | Mean        |
|-------------------------------|-----------|----------|-----------|-------------|
| ETS class                     | MF0001    | 0        | 13        | 0.41        |
| bZIP CREB/G-box-like subclass | MF0002    | 0        | 7         | 0.21        |
| REL class                     | MF0003    | 0        | 17        | 0.33        |
| Nuclear receptor class        | MF0004    | 0        | 13        | 0.78        |
| Forkhead class                | MF0005    | 0        | 13        | 0.36        |
| bZIP cEBP-like subclass       | MF0006    | 0        | 11        | 0.4         |
| bHLH(xip) class               | MF0007    | 0        | 14        | 0.58        |
| MADS class                    | MF0008    | 0        | 29        | 0.42        |
| TRP(MYB) class                | MF0009    | 0        | 13        | 0.66        |
| Homeobox class                | MF0010    | 0        | 21        | 0.91        |
| HMG class                     | MF0011    | 0        | 14        | 0.89        |
| <b>TOTAL</b>                  |           | <b>0</b> | <b>29</b> | <b>0.54</b> |

Table S15. Gene ontology enrichments for human- and primate-accelerated regions

| ID         | DESCRIPTION                                                | ONTOLOGY | Gene-avg Vert. | Gene-codon Vert. | Codons Vert. | Gene-avg Prim. | Gene-codon Prim. | Codons Prim. | PARS_100kb | PARS_1kb | HARS_100kb | HARS_1kb |
|------------|------------------------------------------------------------|----------|----------------|------------------|--------------|----------------|------------------|--------------|------------|----------|------------|----------|
| GO:0006955 | immune response                                            | BP       | 2.E-36         | 1.E-08           | 1.E-228      | 2.E-15         | 8.E-07           | 2.E-102      | 1.E+00     | 1.E+00   | 1.E+00     | 1.E+00   |
| GO:0005576 | extracellular region                                       | CC       | 3.E-20         | 1.E+00           | 6.E-68       | 8.E-07         | 1.E+00           | 1.E-22       | 1.E+00     | 1.E+00   | 1.E+00     | 1.E+00   |
| GO:0005090 | sensory perception of taste                                | BP       | 7.E-14         | 8.E-04           | 8.E-165      | 4.E-12         | 5.E-06           | 1.E-120      | 1.E+00     | 1.E+00   | 1.E+00     | 1.E+00   |
| GO:0005125 | cytokine activity                                          | MF       | 9.E-14         | 1.E+00           | 1.E-32       | 4.E-07         | 1.E+00           | 7.E-16       | 1.E+00     | 1.E+00   | 1.E+00     | 1.E+00   |
| GO:0008009 | chemokine activity                                         | MF       | 4.E-10         | 1.E+00           | 6.E-19       | 9.E-01         | 4.E-02           | 2.E-15       | 1.E+00     | 1.E+00   | 1.E+00     | 1.E+00   |
| GO:0031424 | keratinization                                             | BP       | 9.E-10         | 5.E-02           | 2.E-200      | 2.E-01         | 4.E-05           | 7.E-136      | 1.E+00     | 1.E+00   | 1.E+00     | 1.E+00   |
| GO:0005529 | sugar binding                                              | MF       | 1.E-09         | 1.E+00           | 1.E-41       | 5.E-01         | 1.E+00           | 1.E-23       | 1.E+00     | 1.E+00   | 1.E+00     | 1.E+00   |
| GO:0005615 | extracellular space                                        | CC       | 3.E-07         | 1.E+00           | 1.E+00       | 2.E-01         | 1.E+00           | 1.E+00       | 2.E-09     | 4.E-46   | 1.E+00     | 1.E+00   |
| GO:0008527 | taste receptor activity                                    | MF       | 4.E-07         | 2.E-01           | 1.E-61       | 1.E-05         | 7.E-02           | 1.E-38       | 1.E+00     | 1.E+00   | 1.E+00     | 1.E+00   |
| GO:0007166 | cell surface receptor linked signal transduction           | BP       | 5.E-06         | 1.E+00           | 2.E-33       | 2.E-03         | 1.E+00           | 1.E-09       | 1.E+00     | 1.E+00   | 1.E+00     | 1.E+00   |
| GO:0004888 | transmembrane receptor activity                            | MF       | 7.E-06         | 1.E+00           | 2.E-40       | 1.E-01         | 1.E+00           | 3.E-04       | 1.E+00     | 1.E+00   | 1.E+00     | 1.E+00   |
| GO:0042612 | MHC class I protein complex                                | CC       | 8.E-06         | 1.E+00           | 2.E-122      | 1.E-07         | 2.E-09           | 3.E-44       | 1.E+00     | 1.E+00   | 1.E+00     | 1.E+00   |
| GO:0006952 | defense response                                           | BP       | 9.E-06         | 1.E+00           | 2.E-96       | 2.E-04         | 1.E+00           | 4.E-30       | 1.E+00     | 1.E+00   | 1.E+00     | 1.E+00   |
| GO:0006954 | inflammatory response                                      | BP       | 1.E-05         | 5.E-01           | 5.E-17       | 1.E+00         | 1.E+00           | 2.E-06       | 1.E+00     | 1.E+00   | 1.E+00     | 1.E+00   |
| GO:0006935 | chemotaxis                                                 | BP       | 2.E-05         | 1.E+00           | 7.E-26       | 1.E+00         | 3.E-03           | 2.E-02       | 2.E-91     | 2.E-144  | 1.E+00     | 1.E+00   |
| GO:0019882 | antigen processing and presentation                        | BP       | 3.E-05         | 1.E+00           | 6.E-112      | 3.E-05         | 7.E-05           | 2.E-36       | 1.E+00     | 1.E+00   | 1.E+00     | 1.E+00   |
| GO:0009615 | response to virus                                          | BP       | 2.E-03         | 1.E+00           | 6.E-48       | 5.E-02         | 1.E+00           | 6.E-17       | 1.E+00     | 1.E+00   | 1.E+00     | 1.E+00   |
| GO:0001533 | cornified envelope                                         | CC       | 3.E-03         | 1.E-04           | 4.E-51       | 3.E-02         | 1.E-06           | 4.E-21       | 1.E+00     | 1.E+00   | 1.E+00     | 1.E+00   |
| GO:0004872 | receptor activity                                          | MF       | 4.E-03         | 5.E-20           | 4.E-39       | 1.E+00         | 1.E+00           | 1.E+00       | 1.E+00     | 8.E-13   | 1.E+00     | 1.E+00   |
| GO:0042742 | defense response to bacterium                              | BP       | 6.E-03         | 7.E-01           | 1.E-18       | 1.E+00         | 1.E+00           | 1.E+00       | 1.E+00     | 1.E+00   | 1.E+00     | 1.E+00   |
| GO:0016814 | hydrolase activity, acting on carbon-nitrogen (but not MF  | MF       | 7.E-03         | 1.E-01           | 1.E-07       | 6.E-03         | 1.E+00           | 3.E-39       | 1.E+00     | 1.E+00   | 1.E+00     | 1.E+00   |
| GO:0004522 | pancreatic ribonuclease activity                           | MF       | 7.E-03         | 1.E+00           | 4.E-05       | 1.E+00         | 1.E+00           | 1.E+00       | 1.E+00     | 1.E+00   | 1.E+00     | 1.E+00   |
| GO:0016021 | integral to membrane                                       | CC       | 7.E-03         | 1.E-11           | 6.E-13       | 1.E+00         | 1.E+00           | 1.E+00       | 1.E+00     | 2.E-16   | 1.E+00     | 1.E+00   |
| GO:0006953 | acute-phase response                                       | BP       | 1.E-02         | 1.E+00           | 2.E-50       | 9.E-04         | 1.E+00           | 2.E-10       | 1.E+00     | 1.E+00   | 1.E+00     | 1.E+00   |
| GO:0002504 | antigen processing and presentation of peptide or polyBP   | BP       | 2.E-02         | 4.E-03           | 8.E-11       | 1.E+00         | 1.E+00           | 1.E-09       | 1.E+00     | 1.E+00   | 2.E-02     | 2.E-07   |
| GO:0042613 | MHC class II protein complex                               | CC       | 2.E-02         | 4.E-03           | 8.E-11       | 1.E+00         | 1.E+00           | 1.E-09       | 1.E+00     | 1.E+00   | 2.E-02     | 2.E-07   |
| GO:0005126 | hematopoietin/interferon-class (D200-domain) cytokinMF     | MF       | 2.E-02         | 1.E+00           | 3.E-38       | 2.E-02         | 1.E+00           | 1.E-12       | 1.E+00     | 1.E+00   | 1.E+00     | 1.E+00   |
| GO:0030101 | natural killer cell activation                             | BP       | 2.E-02         | 1.E+00           | 2.E-97       | 2.E-02         | 1.E+00           | 7.E-24       | 1.E+00     | 1.E+00   | 1.E+00     | 1.E+00   |
| GO:0019864 | IgG binding                                                | MF       | 3.E-02         | 2.E-01           | 3.E-45       | 3.E-02         | 1.E+00           | 5.E-32       | 1.E+00     | 1.E+00   | 1.E+00     | 1.E+00   |
| GO:0005882 | intermediate filament                                      | CC       | 6.E-02         | 7.E-01           | 4.E-04       | 1.E+00         | 1.E+00           | 1.E+00       | 1.E+00     | 1.E+00   | 1.E+00     | 1.E+00   |
| GO:0045087 | innate immune response                                     | BP       | 1.E-01         | 1.E+00           | 1.E-44       | 1.E+00         | 1.E+00           | 4.E-29       | 1.E+00     | 1.E+00   | 1.E+00     | 1.E+00   |
| GO:0045410 | positive regulation of interleukin-6 biosynthetic procesBP | BP       | 2.E-01         | 1.E+00           | 3.E-16       | 1.E+00         | 1.E+00           | 4.E-06       | 1.E+00     | 1.E+00   | 1.E+00     | 1.E+00   |
| GO:0009897 | external side of plasma membrane                           | CC       | 2.E-01         | 1.E+00           | 5.E-41       | 4.E-02         | 1.E+00           | 2.E-11       | 1.E+00     | 1.E+00   | 1.E+00     | 1.E+00   |
| GO:0001580 | detection of chemical stimulus involved in sensory per BP  | BP       | 3.E-01         | 1.E+00           | 2.E-08       | 1.E+00         | 1.E+00           | 1.E+00       | 1.E+00     | 1.E+00   | 1.E+00     | 1.E+00   |
| GO:0004866 | endopeptidase inhibitor activity                           | MF       | 3.E-01         | 1.E+00           | 7.E-48       | 1.E+00         | 1.E+00           | 4.E-08       | 1.E+00     | 1.E+00   | 1.E+00     | 1.E+00   |
| GO:0030216 | keratinocyte differentiation                               | BP       | 4.E-01         | 7.E-01           | 4.E-20       | 1.E+00         | 4.E-03           | 5.E-06       | 1.E+00     | 1.E+00   | 1.E+00     | 1.E+00   |
| GO:0005179 | hormone activity                                           | MF       | 5.E-01         | 1.E+00           | 1.E+00       | 1.E+00         | 1.E+00           | 1.E+00       | 1.E+00     | 1.E+00   | 1.E+00     | 1.E+00   |
| GO:0042698 | ovulation cycle                                            | BP       | 5.E-01         | 1.E+00           | 1.E-17       | 5.E-01         | 1.E-02           | 3.E-19       | 1.E+00     | 1.E+00   | 1.E+00     | 1.E+00   |
| GO:0004867 | serine-type endopeptidase inhibitor activity               | MF       | 5.E-01         | 1.E+00           | 5.E-45       | 1.E+00         | 1.E+00           | 2.E-07       | 1.E+00     | 1.E+00   | 1.E+00     | 1.E+00   |
| GO:0007267 | cell-cell signaling                                        | BP       | 9.E-01         | 1.E+00           | 1.E+00       | 1.E+00         | 1.E+00           | 1.E+00       | 1.E+00     | 1.E+00   | 1.E+00     | 1.E+00   |
| GO:0004930 | G-protein coupled receptor activity                        | MF       | 1.E+00         | 1.E-22           | 3.E-74       | 1.E+00         | 1.E+00           | 4.E-11       | 1.E+00     | 1.E+00   | 1.E+00     | 1.E+00   |
| GO:0050896 | response to stimulus                                       | BP       | 1.E+00         | 3.E-28           | 3.E-43       | 1.E+00         | 1.E+00           | 5.E-10       | 1.E+00     | 1.E+00   | 1.E+00     | 1.E+00   |
| GO:0007186 | G-protein coupled receptor protein signaling pathway BP    | BP       | 1.E+00         | 2.E-18           | 5.E-67       | 1.E+00         | 1.E+00           | 4.E-08       | 1.E+00     | 1.E+00   | 1.E+00     | 1.E+00   |
| GO:0016020 | membrane                                                   | CC       | 1.E+00         | 1.E-08           | 3.E-02       | 1.E+00         | 1.E+00           | 1.E+00       | 1.E+00     | 2.E-19   | 1.E+00     | 1.E+00   |
| GO:0005149 | interleukin-1 receptor binding                             | MF       | 1.E+00         | 1.E+00           | 2.E-15       | 5.E-02         | 1.E+00           | 2.E-08       | 1.E+00     | 1.E+00   | 1.E+00     | 1.E+00   |
| GO:0001584 | rhodopsin-like receptor activity                           | MF       | 1.E+00         | 5.E-21           | 5.E-36       | 1.E+00         | 1.E+00           | 1.E+00       | 1.E+00     | 1.E+00   | 1.E+00     | 1.E+00   |
| GO:0004984 | olfactory receptor activity                                | MF       | 1.E+00         | 5.E-29           | 7.E-21       | 1.E+00         | 1.E+00           | 1.E+00       | 1.E+00     | 1.E+00   | 1.E+00     | 1.E+00   |
| GO:0007608 | sensory perception of smell                                | BP       | 1.E+00         | 2.E-28           | 8.E-16       | 1.E+00         | 1.E+00           | 1.E+00       | 1.E+00     | 1.E+00   | 1.E+00     | 1.E+00   |
| GO:0004871 | signal transducer activity                                 | MF       | 1.E+00         | 1.E-11           | 6.E-23       | 1.E+00         | 1.E+00           | 1.E+00       | 1.E+00     | 1.E+00   | 1.E+00     | 1.E+00   |
| GO:0005694 | chromosome                                                 | CC       | 1.E+00         | 1.E+00           | 4.E-02       | 1.E+00         | 1.E+00           | 7.E-04       | 1.E+00     | 7.E-01   | 1.E+00     | 1.E+00   |
| GO:0000775 | chromosome, pericentric region                             | CC       | 1.E+00         | 1.E+00           | 3.E-36       | 1.E+00         | 1.E+00           | 9.E-17       | 1.E+00     | 1.E+00   | 1.E+00     | 1.E+00   |
| GO:0003950 | NAD+ ADP-ribosyltransferase activity                       | MF       | 1.E+00         | 1.E+00           | 1.E-21       | 1.E+00         | 1.E+00           | 3.E-26       | 1.E+00     | 1.E+00   | 1.E+00     | 1.E+00   |
| GO:0005198 | structural molecule activity                               | MF       | 1.E+00         | 1.E+00           | 1.E-118      | 1.E+00         | 1.E+00           | 7.E-53       | 1.E+00     | 1.E+00   | 1.E+00     | 1.E+00   |
| GO:0006281 | DNA repair                                                 | BP       | 1.E+00         | 1.E+00           | 2.E-38       | 1.E+00         | 1.E+00           | 1.E-26       | 1.E+00     | 1.E+00   | 1.E+00     | 1.E+00   |
| GO:0006282 | regulation of DNA repair                                   | BP       | 1.E+00         | 1.E+00           | 6.E-38       | 1.E+00         | 1.E+00           | 3.E-23       | 1.E+00     | 1.E+00   | 1.E+00     | 1.E+00   |
| GO:0006471 | protein amino acid ADP-ribosylation                        | BP       | 1.E+00         | 1.E+00           | 8.E-20       | 1.E+00         | 1.E+00           | 7.E-23       | 1.E+00     | 1.E+00   | 1.E+00     | 1.E+00   |
| GO:0006817 | phosphate transport                                        | BP       | 1.E+00         | 1.E+00           | 1.E-30       | 1.E+00         | 1.E+00           | 7.E-21       | 1.E+00     | 1.E+00   | 1.E+00     | 1.E+00   |
| GO:0006974 | response to DNA damage stimulus                            | BP       | 1.E+00         | 1.E+00           | 5.E-37       | 1.E+00         | 1.E+00           | 1.E-27       | 1.E+00     | 1.E+00   | 1.E+00     | 1.E+00   |
| GO:0007051 | spindle organization and biogenesis                        | BP       | 1.E+00         | 1.E+00           | 2.E-46       | 1.E+00         | 1.E+00           | 3.E-18       | 1.E+00     | 1.E+00   | 1.E+00     | 1.E+00   |
| GO:0007098 | centrosome cycle                                           | BP       | 1.E+00         | 1.E+00           | 1.E-20       | 1.E+00         | 1.E+00           | 2.E-18       | 1.E+00     | 1.E+00   | 1.E+00     | 1.E+00   |
| GO:0008656 | caspase activator activity                                 | MF       | 1.E+00         | 1.E+00           | 2.E-74       | 1.E+00         | 1.E+00           | 2.E-19       | 1.E+00     | 1.E+00   | 1.E+00     | 1.E+00   |
| GO:0017114 | wide-spectrum protease inhibitor activity                  | MF       | 1.E+00         | 1.E+00           | 4.E-46       | 1.E+00         | 1.E+00           | 1.E-18       | 1.E+00     | 1.E+00   | 1.E+00     | 1.E+00   |
| GO:0043159 | acrosomal matrix                                           | CC       | 1.E+00         | 1.E+00           | 2.E-77       | 1.E+00         | 1.E+00           | 5.E-19       | 1.E+00     | 1.E+00   | 1.E+00     | 1.E+00   |
| GO:0045569 | TRAIL binding                                              | MF       | 1.E+00         | 1.E+00           | 2.E-16       | 1.E+00         | 1.E+00           | 2.E-18       | 1.E+00     | 1.E+00   | 1.E+00     | 1.E+00   |
| GO:0042102 | positive regulation of T cell proliferation                | BP       | 1.E+00         | 1.E+00           | 1.E-21       | 1.E+00         | 1.E+00           | 1.E-14       | 1.E+00     | 1.E+00   | 1.E+00     | 1.E+00   |
| GO:0006919 | caspase activation                                         | BP       | 1.E+00         | 1.E+00           | 2.E-58       | 1.E+00         | 1.E+00           | 1.E-12       | 1.E+00     | 1.E+00   | 1.E+00     | 1.E+00   |
| GO:0007566 | embryo implantation                                        | BP       | 1.E+00         | 1.E+00           | 2.E-12       | 1.E+00         | 1.E+00           | 1.E-12       | 1.E+00     | 1.E+00   | 1.E+00     | 1.E+00   |

|            |                                                                 |    |        |        |        |        |        |        |        |        |        |        |
|------------|-----------------------------------------------------------------|----|--------|--------|--------|--------|--------|--------|--------|--------|--------|--------|
| GO:0008625 | induction of apoptosis via death domain receptors               | BP | 1.E+00 | 1.E+00 | 4.E-12 | 1.E+00 | 1.E+00 | 2.E-14 | 1.E+00 | 1.E+00 | 1.E+00 | 1.E+00 |
| GO:0009048 | dosage compensation, by inactivation of X chromosome            | BP | 1.E+00 | 1.E+00 | 1.E-23 | 1.E+00 | 1.E+00 | 1.E-11 | 1.E+00 | 1.E+00 | 1.E+00 | 1.E+00 |
| GO:0045739 | positive regulation of DNA repair                               | BP | 1.E+00 | 1.E+00 | 6.E-33 | 1.E+00 | 1.E+00 | 5.E-11 | 1.E+00 | 1.E+00 | 1.E+00 | 1.E+00 |
| GO:0006978 | DNA damage response, signal transduction by p53 class           | BP | 1.E+00 | 1.E+00 | 9.E-33 | 1.E+00 | 1.E+00 | 3.E-10 | 1.E+00 | 1.E+00 | 1.E+00 | 1.E+00 |
| GO:0042759 | long-chain fatty acid biosynthetic process                      | BP | 1.E+00 | 1.E+00 | 9.E-33 | 1.E+00 | 1.E+00 | 3.E-10 | 1.E+00 | 1.E+00 | 1.E+00 | 1.E+00 |
| GO:0046600 | negative regulation of centriole replication                    | BP | 1.E+00 | 1.E+00 | 9.E-33 | 1.E+00 | 1.E+00 | 3.E-10 | 1.E+00 | 1.E+00 | 1.E+00 | 1.E+00 |
| GO:0019899 | enzyme binding                                                  | MF | 1.E+00 | 1.E+00 | 2.E-41 | 1.E+00 | 1.E+00 | 3.E-10 | 1.E+00 | 1.E+00 | 1.E+00 | 1.E+00 |
| GO:0005581 | collagen                                                        | CC | 1.E+00 | 1.E+00 | 4.E-10 | 1.E+00 | 1.E+00 | 9.E-25 | 1.E+00 | 1.E+00 | 1.E+00 | 1.E+00 |
| GO:0007218 | neuropeptide signaling pathway                                  | BP | 1.E+00 | 1.E+00 | 3.E-18 | 1.E+00 | 1.E+00 | 1.E-09 | 1.E+00 | 1.E+00 | 1.E+00 | 1.E+00 |
| GO:0000940 | outer kinetochore of condensed chromosome                       | CC | 1.E+00 | 1.E+00 | 1.E-15 | 1.E+00 | 1.E+00 | 2.E-09 | 1.E+00 | 1.E+00 | 1.E+00 | 1.E+00 |
| GO:0031436 | BRCA1-BARD1 complex                                             | CC | 1.E+00 | 1.E+00 | 9.E-33 | 1.E+00 | 1.E+00 | 2.E-09 | 1.E+00 | 1.E+00 | 1.E+00 | 1.E+00 |
| GO:0051298 | centrosome duplication                                          | BP | 1.E+00 | 1.E+00 | 5.E-26 | 1.E+00 | 1.E+00 | 3.E-09 | 1.E+00 | 1.E+00 | 1.E+00 | 1.E+00 |
| GO:0006958 | complement activation, classical pathway                        | BP | 1.E+00 | 1.E+00 | 1.E-10 | 1.E+00 | 1.E+00 | 5.E-09 | 1.E+00 | 1.E+00 | 1.E+00 | 1.E+00 |
| GO:0031398 | positive regulation of protein ubiquitination                   | BP | 1.E+00 | 1.E+00 | 2.E-28 | 1.E+00 | 1.E+00 | 1.E-08 | 1.E+00 | 1.E+00 | 1.E+00 | 1.E+00 |
| GO:0019959 | interleukin-8 binding                                           | MF | 1.E+00 | 1.E+00 | 2.E-19 | 1.E+00 | 1.E+00 | 2.E-08 | 1.E+00 | 1.E+00 | 1.E+00 | 1.E+00 |
| GO:0043120 | tumor necrosis factor binding                                   | MF | 1.E+00 | 1.E+00 | 2.E-19 | 1.E+00 | 1.E+00 | 2.E-08 | 1.E+00 | 1.E+00 | 1.E+00 | 1.E+00 |
| GO:0004905 | interferon-alpha/beta receptor activity                         | MF | 1.E+00 | 1.E+00 | 2.E-08 | 1.E+00 | 1.E+00 | 8.E-09 | 1.E+00 | 1.E+00 | 1.E+00 | 1.E+00 |
| GO:0016046 | detection of fungus                                             | BP | 1.E+00 | 1.E+00 | 4.E-19 | 1.E+00 | 1.E+00 | 6.E-08 | 1.E+00 | 1.E+00 | 1.E+00 | 1.E+00 |
| GO:0045362 | positive regulation of interleukin-1 biosynthetic process       | BP | 1.E+00 | 1.E+00 | 4.E-19 | 1.E+00 | 1.E+00 | 6.E-08 | 1.E+00 | 1.E+00 | 1.E+00 | 1.E+00 |
| GO:0007250 | activation of NF-kappaB-inducing kinase activity                | BP | 1.E+00 | 1.E+00 | 8.E-08 | 1.E+00 | 1.E+00 | 2.E-08 | 1.E+00 | 1.E+00 | 1.E+00 | 1.E+00 |
| GO:0030431 | sleep                                                           | BP | 1.E+00 | 1.E+00 | 4.E-32 | 1.E+00 | 1.E+00 | 1.E-07 | 1.E+00 | 1.E+00 | 1.E+00 | 1.E+00 |
| GO:0019966 | interleukin-1 binding                                           | MF | 1.E+00 | 1.E+00 | 6.E-18 | 1.E+00 | 1.E+00 | 1.E-07 | 1.E+00 | 1.E+00 | 1.E+00 | 1.E+00 |
| GO:0042088 | T-helper 1 type immune response                                 | BP | 1.E+00 | 1.E+00 | 4.E-21 | 1.E+00 | 1.E+00 | 2.E-07 | 1.E+00 | 1.E+00 | 1.E+00 | 1.E+00 |
| GO:0000089 | mitotic metaphase                                               | BP | 1.E+00 | 1.E+00 | 5.E-17 | 1.E+00 | 1.E+00 | 2.E-07 | 1.E+00 | 1.E+00 | 1.E+00 | 1.E+00 |
| GO:0008320 | protein transmembrane transporter activity                      | MF | 1.E+00 | 1.E+00 | 4.E-12 | 1.E+00 | 1.E+00 | 2.E-07 | 1.E+00 | 1.E+00 | 1.E+00 | 1.E+00 |
| GO:0001675 | acrosome formation                                              | BP | 1.E+00 | 1.E+00 | 5.E-35 | 1.E+00 | 1.E+00 | 8.E-07 | 1.E+00 | 1.E+00 | 1.E+00 | 1.E+00 |
| GO:0003674 | molecular_function                                              | MF | 1.E+00 | 1.E+00 | 3.E-12 | 1.E+00 | 1.E+00 | 1.E-06 | 1.E+00 | 1.E+00 | 1.E+00 | 1.E+00 |
| GO:0030997 | regulation of centriole-centriole cohesion                      | BP | 1.E+00 | 1.E+00 | 8.E-23 | 1.E+00 | 1.E+00 | 1.E-06 | 1.E+00 | 1.E+00 | 1.E+00 | 1.E+00 |
| GO:0051382 | kinetochore assembly                                            | BP | 1.E+00 | 1.E+00 | 2.E-16 | 1.E+00 | 1.E+00 | 1.E-06 | 1.E+00 | 1.E+00 | 1.E+00 | 1.E+00 |
| GO:0007079 | mitotic chromosome movement towards spindle pole                | BP | 1.E+00 | 1.E+00 | 1.E-17 | 1.E+00 | 1.E+00 | 2.E-06 | 1.E+00 | 1.E+00 | 1.E+00 | 1.E+00 |
| GO:0019835 | cytolysis                                                       | BP | 1.E+00 | 1.E+00 | 1.E-11 | 1.E+00 | 1.E+00 | 2.E-06 | 1.E+00 | 1.E+00 | 1.E+00 | 1.E+00 |
| GO:0045576 | mast cell activation                                            | BP | 1.E+00 | 1.E+00 | 4.E-17 | 1.E+00 | 1.E+00 | 2.E-06 | 1.E+00 | 1.E+00 | 1.E+00 | 1.E+00 |
| GO:0051402 | neuron apoptosis                                                | BP | 1.E+00 | 1.E+00 | 1.E-44 | 1.E+00 | 1.E+00 | 3.E-06 | 1.E+00 | 1.E+00 | 1.E+00 | 1.E+00 |
| GO:0004865 | type 1 serine/threonine specific protein phosphatase inhibition | MF | 1.E+00 | 1.E+00 | 4.E-22 | 1.E+00 | 1.E+00 | 4.E-06 | 1.E+00 | 1.E+00 | 1.E+00 | 1.E+00 |
| GO:0006957 | complement activation, alternative pathway                      | BP | 1.E+00 | 1.E+00 | 1.E-22 | 1.E+00 | 1.E+00 | 6.E-06 | 1.E+00 | 1.E+00 | 1.E+00 | 1.E+00 |
| GO:0046696 | lipopolysaccharide receptor complex                             | CC | 1.E+00 | 1.E+00 | 4.E-16 | 1.E+00 | 1.E+00 | 6.E-06 | 1.E+00 | 1.E+00 | 1.E+00 | 1.E+00 |
| GO:0008274 | gamma-tubulin ring complex                                      | CC | 1.E+00 | 1.E+00 | 5.E-31 | 1.E+00 | 1.E+00 | 8.E-06 | 1.E+00 | 1.E+00 | 1.E+00 | 1.E+00 |
| GO:0009898 | internal side of plasma membrane                                | CC | 1.E+00 | 1.E+00 | 2.E-32 | 1.E+00 | 1.E+00 | 1.E-05 | 1.E+00 | 1.E+00 | 1.E+00 | 1.E+00 |
| GO:0007049 | cell cycle                                                      | BP | 1.E+00 | 1.E+00 | 1.E-32 | 1.E+00 | 1.E+00 | 2.E-05 | 1.E+00 | 1.E+00 | 1.E+00 | 1.E+00 |
| GO:0042105 | alpha-beta T cell receptor complex                              | CC | 1.E+00 | 1.E+00 | 5.E-21 | 1.E+00 | 1.E+00 | 2.E-05 | 1.E+00 | 1.E+00 | 1.E+00 | 1.E+00 |
| GO:0042923 | neuropeptide binding                                            | MF | 1.E+00 | 1.E+00 | 2.E-30 | 1.E+00 | 1.E+00 | 2.E-05 | 1.E+00 | 1.E+00 | 1.E+00 | 1.E+00 |
| GO:0050708 | regulation of protein secretion                                 | BP | 1.E+00 | 1.E+00 | 4.E-06 | 1.E+00 | 1.E+00 | 2.E-05 | 1.E+00 | 1.E+00 | 1.E+00 | 1.E+00 |
| GO:0001530 | lipopolysaccharide binding                                      | MF | 1.E+00 | 1.E+00 | 6.E-15 | 1.E+00 | 1.E+00 | 2.E-05 | 1.E+00 | 1.E+00 | 1.E+00 | 1.E+00 |
| GO:0007128 | meiotic prophase I                                              | BP | 1.E+00 | 1.E+00 | 2.E-13 | 1.E+00 | 1.E+00 | 3.E-05 | 1.E+00 | 1.E+00 | 1.E+00 | 1.E+00 |
| GO:0030414 | protease inhibitor activity                                     | MF | 1.E+00 | 1.E+00 | 6.E-14 | 1.E+00 | 1.E+00 | 3.E-05 | 1.E+00 | 1.E+00 | 1.E+00 | 1.E+00 |
| GO:0005876 | spindle microtubule                                             | CC | 1.E+00 | 1.E+00 | 7.E-09 | 1.E+00 | 1.E+00 | 4.E-05 | 1.E+00 | 1.E+00 | 1.E+00 | 1.E+00 |
| GO:0006959 | humoral immune response                                         | BP | 1.E+00 | 1.E+00 | 4.E-05 | 1.E+00 | 1.E+00 | 1.E-08 | 1.E+00 | 1.E+00 | 1.E+00 | 1.E+00 |
| GO:0005579 | membrane attack complex                                         | CC | 1.E+00 | 1.E+00 | 1.E-12 | 1.E+00 | 1.E+00 | 4.E-05 | 1.E+00 | 1.E+00 | 1.E+00 | 1.E+00 |
| GO:0007080 | mitotic metaphase plate congression                             | BP | 1.E+00 | 1.E+00 | 1.E-13 | 1.E+00 | 1.E+00 | 6.E-05 | 1.E+00 | 1.E+00 | 1.E+00 | 1.E+00 |
| GO:0005813 | centrosome                                                      | CC | 1.E+00 | 1.E+00 | 4.E-08 | 1.E+00 | 1.E+00 | 7.E-05 | 1.E+00 | 1.E+00 | 1.E+00 | 1.E+00 |
| GO:0005540 | hyaluronic acid binding                                         | MF | 1.E+00 | 1.E+00 | 3.E-13 | 1.E+00 | 1.E+00 | 9.E-05 | 1.E+00 | 1.E+00 | 1.E+00 | 1.E+00 |
| GO:0042981 | regulation of apoptosis                                         | BP | 1.E+00 | 1.E+00 | 7.E-23 | 1.E+00 | 1.E+00 | 1.E-04 | 1.E+00 | 1.E+00 | 1.E+00 | 1.E+00 |
| GO:0045368 | positive regulation of interleukin-13 biosynthetic process      | BP | 1.E+00 | 1.E+00 | 2.E-12 | 1.E+00 | 1.E+00 | 1.E-04 | 1.E+00 | 1.E+00 | 1.E+00 | 1.E+00 |
| GO:0030693 | caspase activity                                                | MF | 1.E+00 | 1.E+00 | 9.E-05 | 1.E+00 | 1.E+00 | 3.E-05 | 1.E+00 | 1.E+00 | 1.E+00 | 1.E+00 |
| GO:0005730 | nucleolus                                                       | CC | 1.E+00 | 1.E+00 | 5.E-06 | 1.E+00 | 1.E+00 | 2.E-04 | 1.E+00 | 1.E+00 | 1.E+00 | 1.E+00 |
| GO:0007126 | meiosis                                                         | BP | 1.E+00 | 1.E+00 | 3.E-36 | 1.E+00 | 1.E+00 | 2.E-04 | 1.E+00 | 1.E+00 | 1.E+00 | 1.E+00 |
| GO:0005590 | collagen type VII                                               | CC | 1.E+00 | 1.E+00 | 7.E-10 | 1.E+00 | 1.E+00 | 3.E-04 | 1.E+00 | 1.E+00 | 1.E+00 | 1.E+00 |
| GO:0000776 | kinetochore                                                     | CC | 1.E+00 | 1.E+00 | 2.E-20 | 1.E+00 | 1.E+00 | 4.E-04 | 1.E+00 | 1.E+00 | 1.E+00 | 1.E+00 |
| GO:0005132 | interferon-alpha/beta receptor binding                          | MF | 1.E+00 | 1.E+00 | 3.E-21 | 1.E+00 | 1.E+00 | 4.E-04 | 1.E+00 | 1.E+00 | 1.E+00 | 1.E+00 |
| GO:0045840 | positive regulation of mitosis                                  | BP | 1.E+00 | 1.E+00 | 9.E-11 | 1.E+00 | 1.E+00 | 4.E-04 | 1.E+00 | 1.E+00 | 1.E+00 | 1.E+00 |
| GO:0000281 | cytokinesis after mitosis                                       | BP | 1.E+00 | 1.E+00 | 4.E-11 | 1.E+00 | 1.E+00 | 4.E-04 | 1.E+00 | 1.E+00 | 1.E+00 | 1.E+00 |
| GO:0008157 | protein phosphatase 1 binding                                   | MF | 1.E+00 | 1.E+00 | 6.E-04 | 1.E+00 | 1.E+00 | 2.E-04 | 1.E+00 | 1.E+00 | 1.E+00 | 1.E+00 |
| GO:0008630 | DNA damage response, signal transduction resulting in           | BP | 1.E+00 | 1.E+00 | 2.E-20 | 1.E+00 | 1.E+00 | 8.E-04 | 1.E+00 | 1.E+00 | 1.E+00 | 1.E+00 |
| GO:0003684 | damaged DNA binding                                             | MF | 1.E+00 | 1.E+00 | 9.E-22 | 1.E+00 | 1.E+00 | 8.E-04 | 1.E+00 | 1.E+00 | 1.E+00 | 1.E+00 |
| GO:0045084 | positive regulation of interleukin-12 biosynthetic process      | BP | 1.E+00 | 1.E+00 | 2.E-11 | 1.E+00 | 1.E+00 | 9.E-04 | 1.E+00 | 1.E+00 | 1.E+00 | 1.E+00 |
| GO:0003880 | C-terminal protein carboxyl methyltransferase activity          | MF | 1.E+00 | 1.E+00 | 1.E-03 | 1.E+00 | 1.E+00 | 2.E-07 | 1.E+00 | 1.E+00 | 1.E+00 | 1.E+00 |
| GO:0006481 | C-terminal protein amino acid methylation                       | BP | 1.E+00 | 1.E+00 | 1.E-03 | 1.E+00 | 1.E+00 | 2.E-07 | 1.E+00 | 1.E+00 | 1.E+00 | 1.E+00 |
| GO:0045089 | positive regulation of innate immune response                   | BP | 1.E+00 | 1.E+00 | 9.E-13 | 1.E+00 | 1.E+00 | 1.E-03 | 1.E+00 | 1.E+00 | 1.E+00 | 1.E+00 |
| GO:0042116 | macrophage activation                                           | BP | 1.E+00 | 1.E+00 | 2.E-09 | 1.E+00 | 1.E+00 | 1.E-03 | 1.E+00 | 1.E+00 | 1.E+00 | 1.E+00 |
| GO:0000793 | condensed chromosome                                            | CC | 1.E+00 | 1.E+00 | 4.E-11 | 1.E+00 | 1.E+00 | 1.E-03 | 1.E+00 | 1.E+00 | 1.E+00 | 1.E+00 |
| GO:0019863 | IgE binding                                                     | MF | 1.E+00 | 1.E+00 | 3.E-14 | 1.E+00 | 1.E+00 | 1.E-03 | 1.E+00 | 1.E+00 | 1.E+00 | 1.E+00 |
| GO:0019901 | protein kinase binding                                          | MF | 1.E+00 | 1.E+00 | 2.E-03 | 1.E+00 | 1.E+00 | 2.E-05 | 1.E+00 | 1.E+00 | 1.E+00 | 1.E+00 |
| GO:0007059 | chromosome segregation                                          | BP | 1.E+00 | 1.E+00 | 2.E-07 | 1.E+00 | 1.E+00 | 2.E-03 | 1.E+00 | 1.E+00 | 1.E+00 | 1.E+00 |
| GO:0045580 | regulation of T cell differentiation                            | BP | 1.E+00 | 1.E+00 | 1.E-10 | 1.E+00 | 1.E+00 | 2.E-03 | 1.E+00 | 1.E+00 | 1.E+00 | 1.E+00 |

|            |                                                          |    |        |        |        |        |        |        |         |         |        |        |
|------------|----------------------------------------------------------|----|--------|--------|--------|--------|--------|--------|---------|---------|--------|--------|
| GO:0006290 | pyrimidine dimer repair                                  | BP | 1.E+00 | 1.E+00 | 2.E-03 | 1.E+00 | 1.E+00 | 2.E-11 | 1.E+00  | 1.E+00  | 1.E+00 | 1.E+00 |
| GO:0015999 | eta DNA polymerase activity                              | MF | 1.E+00 | 1.E+00 | 2.E-03 | 1.E+00 | 1.E+00 | 2.E-11 | 1.E+00  | 1.E+00  | 1.E+00 | 1.E+00 |
| GO:0016451 | nu DNA polymerase activity                               | MF | 1.E+00 | 1.E+00 | 2.E-03 | 1.E+00 | 1.E+00 | 2.E-11 | 1.E+00  | 1.E+00  | 1.E+00 | 1.E+00 |
| GO:0030690 | Noc1p-Noc2p complex                                      | CC | 1.E+00 | 1.E+00 | 6.E-12 | 1.E+00 | 1.E+00 | 2.E-03 | 1.E+00  | 1.E+00  | 1.E+00 | 1.E+00 |
| GO:0015631 | tubulin binding                                          | MF | 1.E+00 | 1.E+00 | 6.E-13 | 1.E+00 | 1.E+00 | 2.E-03 | 1.E+00  | 1.E+00  | 1.E+00 | 1.E+00 |
| GO:0006956 | complement activation                                    | BP | 1.E+00 | 1.E+00 | 8.E-08 | 1.E+00 | 1.E+00 | 3.E-03 | 1.E+00  | 1.E+00  | 1.E+00 | 1.E+00 |
| GO:0008301 | DNA bending activity                                     | MF | 1.E+00 | 1.E+00 | 3.E-03 | 1.E+00 | 1.E+00 | 4.E-15 | 1.E+00  | 1.E+00  | 1.E+00 | 1.E+00 |
| GO:0030225 | macrophage differentiation                               | BP | 1.E+00 | 1.E+00 | 5.E-33 | 1.E+00 | 1.E+00 | 4.E-03 | 1.E+00  | 1.E+00  | 1.E+00 | 1.E+00 |
| GO:0048306 | calcium-dependent protein binding                        | MF | 1.E+00 | 1.E+00 | 9.E-07 | 1.E+00 | 1.E+00 | 4.E-03 | 1.E+00  | 1.E+00  | 1.E+00 | 1.E+00 |
| GO:0000781 | chromosome, telomeric region                             | CC | 1.E+00 | 1.E+00 | 4.E-03 | 1.E+00 | 1.E+00 | 3.E-04 | 1.E+00  | 1.E+00  | 1.E+00 | 1.E+00 |
| GO:0001730 | 2'-5'-oligoadenylate synthetase activity                 | MF | 1.E+00 | 1.E+00 | 7.E-04 | 1.E+00 | 1.E+00 | 4.E-03 | 1.E+00  | 1.E+00  | 1.E+00 | 1.E+00 |
| GO:0004918 | interleukin-8 receptor activity                          | MF | 1.E+00 | 1.E+00 | 1.E-24 | 1.E+00 | 1.E+00 | 6.E-03 | 1.E+00  | 1.E+00  | 1.E+00 | 1.E+00 |
| GO:0015711 | organic anion transport                                  | BP | 1.E+00 | 1.E+00 | 1.E-11 | 1.E+00 | 1.E+00 | 6.E-03 | 1.E+00  | 1.E+00  | 1.E+00 | 1.E+00 |
| GO:0040001 | establishment of mitotic spindle localization            | BP | 1.E+00 | 1.E+00 | 4.E-11 | 1.E+00 | 1.E+00 | 7.E-03 | 1.E+00  | 1.E+00  | 1.E+00 | 1.E+00 |
| GO:0042384 | cilium biogenesis                                        | BP | 1.E+00 | 1.E+00 | 2.E-25 | 1.E+00 | 1.E+00 | 9.E-03 | 1.E+00  | 1.E+00  | 1.E+00 | 1.E+00 |
| GO:0030887 | positive regulation of myeloid dendritic cell activation | BP | 1.E+00 | 1.E+00 | 3.E-09 | 1.E+00 | 1.E+00 | 1.E-02 | 1.E+00  | 1.E+00  | 1.E+00 | 1.E+00 |
| GO:0019955 | cytokine binding                                         | MF | 1.E+00 | 1.E+00 | 2.E-27 | 1.E+00 | 1.E+00 | 1.E-02 | 1.E+00  | 1.E+00  | 1.E+00 | 1.E+00 |
| GO:0016410 | N-acyltransferase activity                               | MF | 1.E+00 | 1.E+00 | 1.E-08 | 1.E+00 | 1.E+00 | 1.E-02 | 1.E+00  | 1.E+00  | 1.E+00 | 1.E+00 |
| GO:0047963 | glycine N-choloyltransferase activity                    | MF | 1.E+00 | 1.E+00 | 1.E-08 | 1.E+00 | 1.E+00 | 1.E-02 | 1.E+00  | 1.E+00  | 1.E+00 | 1.E+00 |
| GO:0006915 | apoptosis                                                | BP | 1.E+00 | 1.E+00 | 2.E-04 | 1.E+00 | 1.E+00 | 1.E-02 | 1.E+00  | 1.E+00  | 1.E+00 | 1.E+00 |
| GO:0045132 | meiotic chromosome segregation                           | BP | 1.E+00 | 1.E+00 | 5.E-04 | 1.E+00 | 1.E+00 | 1.E-02 | 1.E+00  | 1.E+00  | 1.E+00 | 1.E+00 |
| GO:0015299 | solute:hydrogen antiporter activity                      | MF | 1.E+00 | 1.E+00 | 1.E-02 | 1.E+00 | 1.E+00 | 2.E-07 | 1.E+00  | 1.E+00  | 1.E+00 | 1.E+00 |
| GO:0042100 | B cell proliferation                                     | BP | 1.E+00 | 1.E+00 | 2.E-02 | 1.E+00 | 1.E+00 | 2.E-08 | 1.E+00  | 1.E+00  | 1.E+00 | 1.E+00 |
| GO:0048305 | immunoglobulin secretion                                 | BP | 1.E+00 | 1.E+00 | 2.E-02 | 1.E+00 | 1.E+00 | 1.E-07 | 1.E+00  | 1.E+00  | 1.E+00 | 1.E+00 |
| GO:0030139 | endocytic vesicle                                        | CC | 1.E+00 | 1.E+00 | 2.E-05 | 1.E+00 | 1.E+00 | 2.E-02 | 1.E+00  | 1.E+00  | 1.E+00 | 1.E+00 |
| GO:0005035 | death receptor activity                                  | MF | 1.E+00 | 1.E+00 | 2.E-02 | 1.E+00 | 1.E+00 | 4.E-03 | 1.E+00  | 1.E+00  | 1.E+00 | 1.E+00 |
| GO:0018675 | (S)-limonene 6-monooxygenase activity                    | MF | 1.E+00 | 1.E+00 | 5.E-04 | 1.E+00 | 1.E+00 | 2.E-02 | 1.E+00  | 1.E+00  | 1.E+00 | 1.E+00 |
| GO:0018676 | (S)-limonene 7-monooxygenase activity                    | MF | 1.E+00 | 1.E+00 | 5.E-04 | 1.E+00 | 1.E+00 | 2.E-02 | 1.E+00  | 1.E+00  | 1.E+00 | 1.E+00 |
| GO:0030271 | chymase activity                                         | MF | 1.E+00 | 1.E+00 | 6.E-04 | 1.E+00 | 1.E+00 | 3.E-02 | 1.E+00  | 1.E+00  | 1.E+00 | 1.E+00 |
| GO:0030890 | positive regulation of B cell proliferation              | BP | 1.E+00 | 1.E+00 | 9.E-06 | 1.E+00 | 1.E+00 | 3.E-02 | 1.E+00  | 1.E+00  | 1.E+00 | 1.E+00 |
| GO:0045351 | interferon type I biosynthetic process                   | BP | 1.E+00 | 1.E+00 | 3.E-02 | 1.E+00 | 1.E+00 | 3.E-06 | 1.E+00  | 1.E+00  | 1.E+00 | 1.E+00 |
| GO:0043515 | kinetochore binding                                      | MF | 1.E+00 | 1.E+00 | 6.E-29 | 1.E+00 | 1.E+00 | 3.E-02 | 1.E+00  | 1.E+00  | 1.E+00 | 1.E+00 |
| GO:0005597 | collagen type XVI                                        | CC | 1.E+00 | 1.E+00 | 5.E-09 | 1.E+00 | 1.E+00 | 4.E-02 | 1.E+00  | 1.E+00  | 1.E+00 | 1.E+00 |
| GO:0005594 | collagen type IX                                         | CC | 1.E+00 | 1.E+00 | 4.E-02 | 1.E+00 | 1.E+00 | 5.E-09 | 1.E+00  | 1.E+00  | 1.E+00 | 1.E+00 |
| GO:0050906 | detection of stimulus involved in sensory perception     | BP | 1.E+00 | 1.E+00 | 7.E-10 | 1.E+00 | 1.E+00 | 5.E-02 | 1.E+00  | 1.E+00  | 1.E+00 | 1.E+00 |
| GO:0043229 | intracellular organelle                                  | CC | 1.E+00 | 1.E+00 | 8.E-11 | 1.E+00 | 1.E+00 | 5.E-02 | 1.E+00  | 1.E+00  | 1.E+00 | 1.E+00 |
| GO:0000278 | mitotic cell cycle                                       | BP | 1.E+00 | 1.E+00 | 6.E-08 | 1.E+00 | 1.E+00 | 5.E-02 | 1.E+00  | 1.E+00  | 1.E+00 | 1.E+00 |
| GO:0006325 | establishment and/or maintenance of chromatin archi      | BP | 1.E+00 | 1.E+00 | 1.E+00 | 1.E+00 | 1.E+00 | 9.E-02 | 1.E-08  | 3.E-03  | 1.E+00 | 1.E+00 |
| GO:0001656 | metanephros development                                  | BP | 1.E+00 | 1.E+00 | 1.E+00 | 1.E+00 | 1.E+00 | 1.E+00 | 1.E-60  | 8.E-82  | 1.E+00 | 1.E+00 |
| GO:0001657 | ureteric bud development                                 | BP | 1.E+00 | 1.E+00 | 1.E+00 | 1.E+00 | 1.E+00 | 1.E+00 | 3.E-69  | 7.E-87  | 1.E+00 | 1.E+00 |
| GO:0003680 | AT DNA binding                                           | MF | 1.E+00 | 1.E+00 | 1.E+00 | 1.E+00 | 1.E+00 | 1.E+00 | 2.E-43  | 2.E-16  | 1.E+00 | 1.E+00 |
| GO:0004716 | receptor signaling protein tyrosine kinase activity      | MF | 1.E+00 | 1.E+00 | 1.E+00 | 1.E+00 | 1.E+00 | 1.E+00 | 5.E-35  | 9.E-32  | 1.E+00 | 1.E+00 |
| GO:0007156 | homophilic cell adhesion                                 | BP | 1.E+00 | 1.E+00 | 1.E+00 | 1.E+00 | 1.E+00 | 1.E+00 | 5.E-52  | 4.E-69  | 1.E+00 | 1.E+00 |
| GO:0007275 | multicellular organismal development                     | BP | 1.E+00 | 1.E+00 | 1.E+00 | 1.E+00 | 1.E+00 | 1.E+00 | 2.E-26  | 3.E-23  | 1.E+00 | 1.E+00 |
| GO:0007399 | nervous system development                               | BP | 1.E+00 | 1.E+00 | 1.E+00 | 1.E+00 | 1.E+00 | 1.E+00 | 2.E-28  | 5.E-44  | 1.E+00 | 1.E+00 |
| GO:0007411 | axon guidance                                            | BP | 1.E+00 | 1.E+00 | 1.E+00 | 1.E+00 | 1.E+00 | 1.E+00 | 5.E-97  | 5.E-100 | 1.E+00 | 1.E+00 |
| GO:0007420 | brain development                                        | BP | 1.E+00 | 1.E+00 | 1.E+00 | 1.E+00 | 1.E+00 | 1.E+00 | 2.E-29  | 1.E-48  | 1.E+00 | 1.E+00 |
| GO:0008046 | axon guidance receptor activity                          | MF | 1.E+00 | 1.E+00 | 1.E+00 | 1.E+00 | 1.E+00 | 1.E+00 | 1.E-193 | 2.E-194 | 1.E+00 | 1.E+00 |
| GO:0009986 | cell surface                                             | CC | 1.E+00 | 1.E+00 | 1.E+00 | 1.E+00 | 1.E+00 | 1.E+00 | 6.E-69  | 1.E-105 | 1.E+00 | 1.E+00 |
| GO:0017154 | semaphorin receptor activity                             | MF | 1.E+00 | 1.E+00 | 1.E+00 | 1.E+00 | 1.E+00 | 1.E+00 | 6.E-39  | 5.E-20  | 1.E+00 | 1.E+00 |
| GO:0030154 | cell differentiation                                     | BP | 1.E+00 | 1.E+00 | 1.E+00 | 1.E+00 | 1.E+00 | 1.E+00 | 4.E-38  | 3.E-44  | 1.E+00 | 1.E+00 |
| GO:0030673 | axolemma                                                 | CC | 1.E+00 | 1.E+00 | 1.E+00 | 1.E+00 | 1.E+00 | 1.E+00 | 3.E-231 | 4.E-221 | 1.E+00 | 1.E+00 |
| GO:0042802 | identical protein binding                                | MF | 1.E+00 | 1.E+00 | 1.E+00 | 1.E+00 | 1.E+00 | 1.E+00 | 5.E-46  | 1.E-83  | 1.E+00 | 1.E+00 |
| GO:0050772 | positive regulation of axonogenesis                      | BP | 1.E+00 | 1.E+00 | 1.E+00 | 1.E+00 | 1.E+00 | 1.E+00 | 4.E-184 | 4.E-181 | 1.E+00 | 1.E+00 |
| GO:0007155 | cell adhesion                                            | BP | 1.E+00 | 1.E+00 | 1.E+00 | 1.E+00 | 1.E+00 | 1.E+00 | 5.E-10  | 8.E-25  | 1.E+00 | 1.E+00 |
| GO:0005021 | vascular endothelial growth factor receptor activity     | MF | 1.E+00 | 1.E+00 | 1.E+00 | 1.E+00 | 1.E+00 | 1.E+00 | 5.E-27  | 8.E-10  | 1.E+00 | 1.E+00 |
| GO:0031032 | actomyosin structure organization and biogenesis         | BP | 1.E+00 | 1.E+00 | 1.E+00 | 1.E+00 | 1.E+00 | 1.E+00 | 2.E-12  | 4.E-08  | 1.E+00 | 1.E+00 |
| GO:0004714 | transmembrane receptor protein tyrosine kinase activ     | MF | 1.E+00 | 1.E+00 | 1.E+00 | 1.E+00 | 1.E+00 | 1.E+00 | 1.E-08  | 2.E-07  | 1.E+00 | 1.E+00 |
| GO:0006487 | protein amino acid N-linked glycosylation                | BP | 1.E+00 | 1.E+00 | 1.E+00 | 1.E+00 | 1.E+00 | 1.E+00 | 8.E-07  | 4.E-17  | 1.E+00 | 1.E+00 |
| GO:0008113 | peptide-methionine-(S)-S-oxide reductase activity        | MF | 1.E+00 | 1.E+00 | 1.E+00 | 1.E+00 | 1.E+00 | 1.E+00 | 4.E-12  | 5.E-06  | 1.E+00 | 1.E+00 |
| GO:0008093 | cytoskeletal adaptor activity                            | MF | 1.E+00 | 1.E+00 | 1.E+00 | 1.E+00 | 1.E+00 | 1.E+00 | 7.E-07  | 2.E-05  | 1.E+00 | 1.E+00 |
| GO:0007417 | central nervous system development                       | BP | 1.E+00 | 1.E+00 | 1.E+00 | 1.E+00 | 1.E+00 | 1.E+00 | 4.E-04  | 1.E-12  | 1.E+00 | 1.E+00 |
| GO:0015247 | aminophospholipid transporter activity                   | MF | 1.E+00 | 1.E+00 | 1.E+00 | 1.E+00 | 1.E+00 | 1.E+00 | 4.E-04  | 9.E-06  | 1.E+00 | 1.E+00 |
| GO:0019829 | cation-transporting ATPase activity                      | MF | 1.E+00 | 1.E+00 | 1.E+00 | 1.E+00 | 1.E+00 | 1.E+00 | 4.E-04  | 9.E-06  | 1.E+00 | 1.E+00 |
| GO:0007169 | transmembrane receptor protein tyrosine kinase signa     | BP | 1.E+00 | 1.E+00 | 1.E+00 | 1.E+00 | 1.E+00 | 1.E+00 | 2.E-03  | 2.E-07  | 1.E+00 | 1.E+00 |
| GO:0015204 | urea transmembrane transporter activity                  | MF | 1.E+00 | 1.E+00 | 1.E+00 | 1.E+00 | 1.E+00 | 1.E+00 | 2.E-03  | 1.E-05  | 1.E+00 | 1.E+00 |
| GO:0015840 | urea transport                                           | BP | 1.E+00 | 1.E+00 | 1.E+00 | 1.E+00 | 1.E+00 | 1.E+00 | 2.E-03  | 1.E-05  | 1.E+00 | 1.E+00 |
| GO:0008533 | astacin activity                                         | MF | 1.E+00 | 1.E+00 | 1.E+00 | 1.E+00 | 1.E+00 | 1.E+00 | 2.E-08  | 2.E-03  | 1.E+00 | 1.E+00 |
| GO:0005923 | tight junction                                           | CC | 1.E+00 | 1.E+00 | 1.E+00 | 1.E+00 | 1.E+00 | 1.E+00 | 1.E-05  | 2.E-03  | 1.E+00 | 1.E+00 |
| GO:0030165 | PDZ domain binding                                       | MF | 1.E+00 | 1.E+00 | 1.E+00 | 1.E+00 | 1.E+00 | 1.E+00 | 2.E-03  | 1.E-03  | 1.E+00 | 1.E+00 |
| GO:0008510 | sodium:bicarbonate symporter activity                    | MF | 1.E+00 | 1.E+00 | 1.E+00 | 1.E+00 | 1.E+00 | 1.E+00 | 3.E-03  | 5.E-04  | 1.E+00 | 1.E+00 |
| GO:0004152 | dihydroorotate dehydrogenase activity                    | MF | 1.E+00 | 1.E+00 | 1.E+00 | 1.E+00 | 1.E+00 | 1.E+00 | 4.E-04  | 1.E-02  | 1.E+00 | 1.E+00 |
| GO:0004158 | dihydroorotate oxidase activity                          | MF | 1.E+00 | 1.E+00 | 1.E+00 | 1.E+00 | 1.E+00 | 1.E+00 | 4.E-04  | 1.E-02  | 1.E+00 | 1.E+00 |
| GO:0007507 | heart development                                        | BP | 1.E+00 | 1.E+00 | 1.E+00 | 1.E+00 | 1.E+00 | 1.E+00 | 1.E-05  | 2.E-02  | 1.E+00 | 1.E+00 |











|            |                                                         |    |        |        |        |        |        |        |        |        |        |        |        |
|------------|---------------------------------------------------------|----|--------|--------|--------|--------|--------|--------|--------|--------|--------|--------|--------|
| GO:0019229 | regulation of vasoconstriction                          | BP | 1.E+00 | 1.E+00 | 1.E-02 | 1.E+00 |
| GO:0016176 | superoxide-generating NADPH oxidase activator activi    | MF | 1.E+00 | 1.E+00 | 1.E-02 | 1.E+00 |
| GO:0006506 | GPI anchor biosynthetic process                         | BP | 1.E+00 | 1.E+00 | 1.E-02 | 1.E+00 |
| GO:0009582 | detection of abiotic stimulus                           | BP | 1.E+00 | 1.E+00 | 1.E-02 | 1.E+00 |
| GO:0004919 | interleukin-9 receptor activity                         | MF | 1.E+00 | 1.E+00 | 1.E-02 | 1.E+00 |
| GO:0050715 | positive regulation of cytokine secretion               | BP | 1.E+00 | 1.E+00 | 1.E-02 | 1.E+00 |
| GO:0004060 | arylamine N-acetyltransferase activity                  | MF | 1.E+00 | 1.E+00 | 1.E-02 | 1.E+00 |
| GO:0015198 | oligopeptide transporter activity                       | MF | 1.E+00 | 1.E+00 | 1.E-02 | 1.E+00 |
| GO:0050832 | defense response to fungus                              | BP | 1.E+00 | 1.E+00 | 2.E-02 | 1.E+00 |
| GO:0045263 | proton-transporting ATP synthase complex, coupling fi   | CC | 1.E+00 | 1.E+00 | 2.E-02 | 1.E+00 |
| GO:0006183 | GTP biosynthetic process                                | BP | 1.E+00 | 1.E+00 | 2.E-02 | 1.E+00 |
| GO:0051260 | protein homoooligomerization                            | BP | 1.E+00 | 1.E+00 | 2.E-02 | 1.E+00 |
| GO:0000747 | conjugation with cellular fusion                        | BP | 1.E+00 | 1.E+00 | 2.E-02 | 1.E+00 |
| GO:0042289 | MHC class II protein binding                            | MF | 1.E+00 | 1.E+00 | 2.E-02 | 1.E+00 |
| GO:0019861 | flagellum                                               | CC | 1.E+00 | 1.E+00 | 2.E-02 | 1.E+00 |
| GO:0004964 | lutropin-choriogonadotropic hormone receptor activit    | MF | 1.E+00 | 1.E+00 | 2.E-02 | 1.E+00 |
| GO:0004238 | mepirin A activity                                      | MF | 1.E+00 | 1.E+00 | 3.E-02 | 1.E+00 |
| GO:0043367 | CD4-positive, alpha beta T cell differentiation         | BP | 1.E+00 | 1.E+00 | 3.E-02 | 1.E+00 |
| GO:0043374 | CD8-positive, alpha-beta T cell differentiation         | BP | 1.E+00 | 1.E+00 | 3.E-02 | 1.E+00 |
| GO:0016712 | oxidoreductase activity, acting on paired donors, with  | MF | 1.E+00 | 1.E+00 | 3.E-02 | 1.E+00 |
| GO:0004574 | oligo-1,6-glucosidase activity                          | MF | 1.E+00 | 1.E+00 | 3.E-02 | 1.E+00 |
| GO:0004575 | sucrose alpha-glucosidase activity                      | MF | 1.E+00 | 1.E+00 | 3.E-02 | 1.E+00 |
| GO:0015833 | peptide transport                                       | BP | 1.E+00 | 1.E+00 | 3.E-02 | 1.E+00 |
| GO:0006633 | fatty acid biosynthetic process                         | BP | 1.E+00 | 1.E+00 | 4.E-02 | 1.E+00 |
| GO:0007586 | digestion                                               | BP | 1.E+00 | 1.E+00 | 4.E-02 | 1.E+00 |
| GO:0006525 | arginine metabolic process                              | BP | 1.E+00 | 1.E+00 | 4.E-02 | 1.E+00 |
| GO:0005223 | intracellular cGMP activated cation channel activity    | MF | 1.E+00 | 1.E+00 | 4.E-02 | 1.E+00 |
| GO:0006824 | cobalt ion transport                                    | BP | 1.E+00 | 1.E+00 | 4.E-02 | 1.E+00 |
| GO:0015087 | cobalt ion transmembrane transporter activity           | MF | 1.E+00 | 1.E+00 | 4.E-02 | 1.E+00 |
| GO:0030199 | collagen fibril organization                            | BP | 1.E+00 | 1.E+00 | 5.E-02 | 1.E+00 |
| GO:0001772 | immunological synapse                                   | CC | 1.E+00 | 1.E+00 | 1.E+00 | 1.E+00 | 1.E+00 | 2.E-02 | 1.E+00 | 9.E-02 | 1.E+00 | 1.E+00 | 1.E+00 |
| GO:0005588 | collagen type V                                         | CC | 1.E+00 | 1.E+00 | 5.E-01 | 1.E+00 | 1.E+00 | 3.E-06 | 1.E+00 | 1.E+00 | 1.E+00 | 1.E+00 | 1.E+00 |
| GO:0045860 | positive regulation of protein kinase activity          | BP | 1.E+00 | 1.E+00 | 6.E-01 | 1.E+00 | 1.E+00 | 2.E-09 | 1.E+00 | 1.E+00 | 1.E+00 | 1.E+00 | 1.E+00 |
| GO:0000724 | double-strand break repair via homologous recombina     | BP | 1.E+00 | 1.E+00 | 1.E+00 | 1.E+00 | 1.E+00 | 5.E-19 | 1.E+00 | 1.E+00 | 1.E+00 | 1.E+00 | 1.E+00 |
| GO:0005587 | collagen type IV                                        | CC | 1.E+00 | 1.E+00 | 1.E+00 | 1.E+00 | 1.E+00 | 2.E-33 | 1.E+00 | 1.E+00 | 1.E+00 | 1.E+00 | 1.E+00 |
| GO:0042062 | long-term strengthening of neuromuscular junction       | BP | 1.E+00 | 1.E+00 | 1.E+00 | 1.E+00 | 1.E+00 | 3.E-27 | 1.E+00 | 1.E+00 | 1.E+00 | 1.E+00 | 1.E+00 |
| GO:0007090 | regulation of S phase of mitotic cell cycle             | BP | 1.E+00 | 1.E+00 | 1.E+00 | 1.E+00 | 1.E+00 | 3.E-14 | 1.E+00 | 1.E+00 | 1.E+00 | 1.E+00 | 1.E+00 |
| GO:0016072 | rRNA metabolic process                                  | BP | 1.E+00 | 1.E+00 | 1.E+00 | 1.E+00 | 1.E+00 | 3.E-13 | 1.E+00 | 1.E+00 | 1.E+00 | 1.E+00 | 1.E+00 |
| GO:0003697 | single-stranded DNA binding                             | MF | 1.E+00 | 1.E+00 | 1.E+00 | 1.E+00 | 1.E+00 | 5.E-13 | 1.E+00 | 1.E+00 | 1.E+00 | 1.E+00 | 1.E+00 |
| GO:0030957 | Tat protein binding                                     | MF | 1.E+00 | 1.E+00 | 1.E+00 | 1.E+00 | 1.E+00 | 7.E-13 | 1.E+00 | 1.E+00 | 1.E+00 | 1.E+00 | 1.E+00 |
| GO:0042255 | ribosome assembly                                       | BP | 1.E+00 | 1.E+00 | 1.E+00 | 1.E+00 | 1.E+00 | 7.E-13 | 1.E+00 | 1.E+00 | 1.E+00 | 1.E+00 | 1.E+00 |
| GO:0001915 | negative regulation of T cell mediated cytotoxicity     | BP | 1.E+00 | 1.E+00 | 1.E+00 | 1.E+00 | 1.E+00 | 3.E-11 | 1.E+00 | 1.E+00 | 1.E+00 | 1.E+00 | 1.E+00 |
| GO:0001960 | negative regulation of cytokine and chemokine mediat    | BP | 1.E+00 | 1.E+00 | 1.E+00 | 1.E+00 | 1.E+00 | 3.E-11 | 1.E+00 | 1.E+00 | 1.E+00 | 1.E+00 | 1.E+00 |
| GO:0050857 | positive regulation of antigen receptor-mediated signa  | BP | 1.E+00 | 1.E+00 | 1.E+00 | 1.E+00 | 1.E+00 | 3.E-11 | 1.E+00 | 1.E+00 | 1.E+00 | 1.E+00 | 1.E+00 |
| GO:0004364 | glutathione transferase activity                        | MF | 1.E+00 | 1.E+00 | 1.E+00 | 1.E+00 | 1.E+00 | 1.E-10 | 1.E+00 | 1.E+00 | 1.E+00 | 1.E+00 | 1.E+00 |
| GO:0005539 | glycosaminoglycan binding                               | MF | 1.E+00 | 1.E+00 | 1.E+00 | 1.E+00 | 1.E+00 | 3.E-08 | 1.E+00 | 1.E+00 | 1.E+00 | 1.E+00 | 1.E+00 |
| GO:0004126 | cytidine deaminase activity                             | MF | 1.E+00 | 1.E+00 | 1.E+00 | 1.E+00 | 1.E+00 | 6.E-08 | 1.E+00 | 1.E+00 | 1.E+00 | 1.E+00 | 1.E+00 |
| GO:0051209 | release of sequestered calcium ion into cytosol         | BP | 1.E+00 | 1.E+00 | 1.E+00 | 1.E+00 | 1.E+00 | 9.E-08 | 1.E+00 | 1.E+00 | 1.E+00 | 1.E+00 | 1.E+00 |
| GO:0045869 | negative regulation of retroviral genome replication    | BP | 1.E+00 | 1.E+00 | 1.E+00 | 1.E+00 | 1.E+00 | 1.E-07 | 1.E+00 | 1.E+00 | 1.E+00 | 1.E+00 | 1.E+00 |
| GO:0030109 | HLA-B specific inhibitory MHC class I receptor activity | MF | 1.E+00 | 1.E+00 | 1.E+00 | 1.E+00 | 1.E+00 | 1.E-07 | 1.E+00 | 1.E+00 | 1.E+00 | 1.E+00 | 1.E+00 |
| GO:0030529 | ribonucleoprotein complex                               | CC | 1.E+00 | 1.E+00 | 1.E+00 | 1.E+00 | 1.E+00 | 2.E-07 | 1.E+00 | 1.E+00 | 1.E+00 | 1.E+00 | 1.E+00 |
| GO:0000722 | telomere maintenance via recombination                  | BP | 1.E+00 | 1.E+00 | 1.E+00 | 1.E+00 | 1.E+00 | 2.E-07 | 1.E+00 | 1.E+00 | 1.E+00 | 1.E+00 | 1.E+00 |
| GO:0051607 | defense response to virus                               | BP | 1.E+00 | 1.E+00 | 1.E+00 | 1.E+00 | 1.E+00 | 1.E-06 | 1.E+00 | 1.E+00 | 1.E+00 | 1.E+00 | 1.E+00 |
| GO:0050853 | B cell receptor signaling pathway                       | BP | 1.E+00 | 1.E+00 | 1.E+00 | 1.E+00 | 1.E+00 | 2.E-06 | 1.E+00 | 1.E+00 | 1.E+00 | 1.E+00 | 1.E+00 |
| GO:0004572 | mannosyl-oligosaccharide 1,3-1,6-alpha-mannosidase      | MF | 1.E+00 | 1.E+00 | 1.E+00 | 1.E+00 | 1.E+00 | 2.E-06 | 1.E+00 | 1.E+00 | 1.E+00 | 1.E+00 | 1.E+00 |
| GO:0006642 | triacylglycerol mobilization                            | BP | 1.E+00 | 1.E+00 | 1.E+00 | 1.E+00 | 1.E+00 | 4.E-06 | 1.E+00 | 1.E+00 | 1.E+00 | 1.E+00 | 1.E+00 |
| GO:0003735 | structural constituent of ribosome                      | MF | 1.E+00 | 1.E+00 | 1.E+00 | 1.E+00 | 1.E+00 | 8.E-06 | 1.E+00 | 1.E+00 | 1.E+00 | 1.E+00 | 1.E+00 |
| GO:0007093 | mitotic cell cycle checkpoint                           | BP | 1.E+00 | 1.E+00 | 1.E+00 | 1.E+00 | 1.E+00 | 8.E-06 | 1.E+00 | 1.E+00 | 1.E+00 | 1.E+00 | 1.E+00 |
| GO:0015934 | large ribosomal subunit                                 | CC | 1.E+00 | 1.E+00 | 1.E+00 | 1.E+00 | 1.E+00 | 9.E-06 | 1.E+00 | 1.E+00 | 1.E+00 | 1.E+00 | 1.E+00 |
| GO:0050852 | T cell receptor signaling pathway                       | BP | 1.E+00 | 1.E+00 | 1.E+00 | 1.E+00 | 1.E+00 | 9.E-06 | 1.E+00 | 1.E+00 | 1.E+00 | 1.E+00 | 1.E+00 |
| GO:0008037 | cell recognition                                        | BP | 1.E+00 | 1.E+00 | 1.E+00 | 1.E+00 | 1.E+00 | 9.E-06 | 1.E+00 | 1.E+00 | 1.E+00 | 1.E+00 | 1.E+00 |
| GO:0016314 | phosphatidylinositol-3,4,5-trisphosphate 3-phosphata:   | MF | 1.E+00 | 1.E+00 | 1.E+00 | 1.E+00 | 1.E+00 | 2.E-05 | 1.E+00 | 1.E+00 | 1.E+00 | 1.E+00 | 1.E+00 |
| GO:0006376 | mRNA splice site selection                              | BP | 1.E+00 | 1.E+00 | 1.E+00 | 1.E+00 | 1.E+00 | 4.E-05 | 1.E+00 | 1.E+00 | 1.E+00 | 1.E+00 | 1.E+00 |
| GO:0015643 | toxin binding                                           | MF | 1.E+00 | 1.E+00 | 1.E+00 | 1.E+00 | 1.E+00 | 6.E-05 | 1.E+00 | 1.E+00 | 1.E+00 | 1.E+00 | 1.E+00 |
| GO:0030141 | secretory granule                                       | CC | 1.E+00 | 1.E+00 | 1.E+00 | 1.E+00 | 1.E+00 | 1.E-04 | 1.E+00 | 1.E+00 | 1.E+00 | 1.E+00 | 1.E+00 |
| GO:0016554 | cytidine to uridine editing                             | BP | 1.E+00 | 1.E+00 | 1.E+00 | 1.E+00 | 1.E+00 | 3.E-04 | 1.E+00 | 1.E+00 | 1.E+00 | 1.E+00 | 1.E+00 |
| GO:0005654 | nucleoplasm                                             | CC | 1.E+00 | 1.E+00 | 1.E+00 | 1.E+00 | 1.E+00 | 4.E-04 | 1.E+00 | 1.E+00 | 1.E+00 | 1.E+00 | 1.E+00 |
| GO:0030217 | T cell differentiation                                  | BP | 1.E+00 | 1.E+00 | 1.E+00 | 1.E+00 | 1.E+00 | 4.E-04 | 1.E+00 | 1.E+00 | 1.E+00 | 1.E+00 | 1.E+00 |
| GO:0007030 | Golgi organization and biogenesis                       | BP | 1.E+00 | 1.E+00 | 1.E+00 | 1.E+00 | 1.E+00 | 6.E-04 | 1.E+00 | 1.E+00 | 1.E+00 | 1.E+00 | 1.E+00 |
| GO:0007067 | mitosis                                                 | BP | 1.E+00 | 1.E+00 | 1.E+00 | 1.E+00 | 1.E+00 | 8.E-04 | 1.E+00 | 1.E+00 | 1.E+00 | 1.E+00 | 1.E+00 |
| GO:0003720 | telomerase activity                                     | MF | 1.E+00 | 1.E+00 | 1.E+00 | 1.E+00 | 1.E+00 | 1.E-03 | 1.E+00 | 1.E+00 | 1.E+00 | 1.E+00 | 1.E+00 |
| GO:0005697 | telomerase holoenzyme complex                           | CC | 1.E+00 | 1.E+00 | 1.E+00 | 1.E+00 | 1.E+00 | 1.E-03 | 1.E+00 | 1.E+00 | 1.E+00 | 1.E+00 | 1.E+00 |
| GO:0007004 | telomere maintenance via telomerase                     | BP | 1.E+00 | 1.E+00 | 1.E+00 | 1.E+00 | 1.E+00 | 2.E-03 | 1.E+00 | 1.E+00 | 1.E+00 | 1.E+00 | 1.E+00 |
| GO:0051726 | regulation of cell cycle                                | BP | 1.E+00 | 1.E+00 | 1.E+00 | 1.E+00 | 1.E+00 | 2.E-03 | 1.E+00 | 1.E+00 | 1.E+00 | 1.E+00 | 1.E+00 |

|             |                                                        |    |        |        |        |        |        |        |        |        |        |        |        |
|-------------|--------------------------------------------------------|----|--------|--------|--------|--------|--------|--------|--------|--------|--------|--------|--------|
| GO:0005795  | Golgi stack                                            | CC | 1.E+00 | 1.E+00 | 1.E+00 | 1.E+00 | 1.E+00 | 1.E+00 | 2.E-03 | 1.E+00 | 1.E+00 | 1.E+00 | 1.E+00 |
| GO:0005840  | ribosome                                               | CC | 1.E+00 | 1.E+00 | 1.E+00 | 1.E+00 | 1.E+00 | 1.E+00 | 2.E-03 | 1.E+00 | 1.E+00 | 1.E+00 | 1.E+00 |
| GO:0046329  | negative regulation of JNK cascade                     | BP | 1.E+00 | 1.E+00 | 1.E+00 | 1.E+00 | 1.E+00 | 1.E+00 | 3.E-03 | 1.E+00 | 1.E+00 | 1.E+00 | 1.E+00 |
| GO:0016198  | axon choice point recognition                          | BP | 1.E+00 | 1.E+00 | 1.E+00 | 1.E+00 | 1.E+00 | 1.E+00 | 4.E-03 | 1.E+00 | 1.E+00 | 1.E+00 | 1.E+00 |
| GO:0042627  | chylomicron                                            | CC | 1.E+00 | 1.E+00 | 1.E+00 | 1.E+00 | 1.E+00 | 1.E+00 | 4.E-03 | 1.E+00 | 1.E+00 | 1.E+00 | 1.E+00 |
| GO:0030546  | receptor activator activity                            | MF | 1.E+00 | 1.E+00 | 1.E+00 | 1.E+00 | 1.E+00 | 1.E+00 | 4.E-03 | 1.E+00 | 1.E+00 | 1.E+00 | 1.E+00 |
| GO:0008396  | oxysterol 7-alpha-hydroxylase activity                 | MF | 1.E+00 | 1.E+00 | 1.E+00 | 1.E+00 | 1.E+00 | 1.E+00 | 5.E-03 | 1.E+00 | 1.E+00 | 1.E+00 | 1.E+00 |
| GO:0004014  | adenosylmethionine decarboxylase activity              | MF | 1.E+00 | 1.E+00 | 1.E+00 | 1.E+00 | 1.E+00 | 1.E+00 | 6.E-03 | 1.E+00 | 1.E+00 | 1.E+00 | 1.E+00 |
| GO:0006597  | spermine biosynthetic process                          | BP | 1.E+00 | 1.E+00 | 1.E+00 | 1.E+00 | 1.E+00 | 1.E+00 | 6.E-03 | 1.E+00 | 1.E+00 | 1.E+00 | 1.E+00 |
| GO:0045861  | negative regulation of proteolysis                     | BP | 1.E+00 | 1.E+00 | 1.E+00 | 1.E+00 | 1.E+00 | 1.E+00 | 7.E-03 | 1.E+00 | 1.E+00 | 1.E+00 | 1.E+00 |
| GO:0016311  | dephosphorylation                                      | BP | 1.E+00 | 1.E+00 | 1.E+00 | 1.E+00 | 1.E+00 | 1.E+00 | 7.E-03 | 1.E+00 | 1.E+00 | 1.E+00 | 1.E+00 |
| GO:0047497  | mitochondrion transport along microtubule              | BP | 1.E+00 | 1.E+00 | 1.E+00 | 1.E+00 | 1.E+00 | 1.E+00 | 8.E-03 | 1.E+00 | 1.E+00 | 1.E+00 | 1.E+00 |
| GO:0045948  | positive regulation of translational initiation        | BP | 1.E+00 | 1.E+00 | 1.E+00 | 1.E+00 | 1.E+00 | 1.E+00 | 1.E-02 | 1.E+00 | 1.E+00 | 1.E+00 | 1.E+00 |
| GO:0006622  | protein targeting to lysosome                          | BP | 1.E+00 | 1.E+00 | 1.E+00 | 1.E+00 | 1.E+00 | 1.E+00 | 1.E-02 | 1.E+00 | 1.E+00 | 1.E+00 | 1.E+00 |
| GO:0035162  | embryonic hemopoiesis                                  | BP | 1.E+00 | 1.E+00 | 1.E+00 | 1.E+00 | 1.E+00 | 1.E+00 | 1.E-02 | 1.E+00 | 1.E+00 | 1.E+00 | 1.E+00 |
| GO:0000213  | tRNA-intron endonuclease activity                      | MF | 1.E+00 | 1.E+00 | 1.E+00 | 1.E+00 | 1.E+00 | 1.E+00 | 2.E-02 | 1.E+00 | 1.E+00 | 1.E+00 | 1.E+00 |
| GO:0000214  | tRNA-intron endonuclease complex                       | CC | 1.E+00 | 1.E+00 | 1.E+00 | 1.E+00 | 1.E+00 | 1.E+00 | 2.E-02 | 1.E+00 | 1.E+00 | 1.E+00 | 1.E+00 |
| GO:0006777  | Mo-molybdopterin cofactor biosynthetic process         | BP | 1.E+00 | 1.E+00 | 1.E+00 | 1.E+00 | 1.E+00 | 1.E+00 | 2.E-02 | 1.E+00 | 1.E+00 | 1.E+00 | 1.E+00 |
| GO:0001660  | fever                                                  | BP | 1.E+00 | 1.E+00 | 1.E+00 | 1.E+00 | 1.E+00 | 1.E+00 | 2.E-02 | 1.E+00 | 1.E+00 | 1.E+00 | 1.E+00 |
| GO:0003711  | transcription elongation regulator activity            | MF | 1.E+00 | 1.E+00 | 1.E+00 | 1.E+00 | 1.E+00 | 1.E+00 | 3.E-02 | 1.E+00 | 1.E+00 | 1.E+00 | 1.E+00 |
| GO:0020037  | heme binding                                           | MF | 1.E+00 | 1.E+00 | 1.E+00 | 1.E+00 | 1.E+00 | 1.E+00 | 3.E-02 | 1.E+00 | 1.E+00 | 1.E+00 | 1.E+00 |
| GO:0030917  | midbrain-hindbrain boundary development                | BP | 1.E+00 | 1.E+00 | 1.E+00 | 1.E+00 | 1.E+00 | 1.E+00 | 3.E-02 | 1.E+00 | 1.E+00 | 1.E+00 | 1.E+00 |
| GO:00016363 | nuclear matrix                                         | CC | 1.E+00 | 1.E+00 | 1.E+00 | 1.E+00 | 1.E+00 | 1.E+00 | 3.E-02 | 1.E+00 | 1.E+00 | 1.E+00 | 1.E+00 |
| GO:0031575  | G1/S transition checkpoint                             | BP | 1.E+00 | 1.E+00 | 1.E+00 | 1.E+00 | 1.E+00 | 1.E+00 | 3.E-02 | 1.E+00 | 1.E+00 | 1.E+00 | 1.E+00 |
| GO:0042405  | nuclear inclusion body                                 | CC | 1.E+00 | 1.E+00 | 1.E+00 | 1.E+00 | 1.E+00 | 1.E+00 | 3.E-02 | 1.E+00 | 1.E+00 | 1.E+00 | 1.E+00 |
| GO:0050868  | negative regulation of T cell activation               | BP | 1.E+00 | 1.E+00 | 1.E+00 | 1.E+00 | 1.E+00 | 1.E+00 | 4.E-02 | 1.E+00 | 1.E+00 | 1.E+00 | 1.E+00 |
| GO:0004277  | granzyme A activity                                    | MF | 1.E+00 | 1.E+00 | 1.E+00 | 1.E+00 | 1.E+00 | 1.E+00 | 4.E-02 | 1.E+00 | 1.E+00 | 1.E+00 | 1.E+00 |
| GO:0006922  | cleavage of lamin                                      | BP | 1.E+00 | 1.E+00 | 1.E+00 | 1.E+00 | 1.E+00 | 1.E+00 | 4.E-02 | 1.E+00 | 1.E+00 | 1.E+00 | 1.E+00 |
| GO:0005792  | microsome                                              | CC | 1.E+00 | 1.E+00 | 1.E+00 | 1.E+00 | 1.E+00 | 1.E+00 | 4.E-02 | 1.E+00 | 1.E+00 | 1.E+00 | 1.E+00 |
| GO:0006885  | regulation of pH                                       | BP | 1.E+00 | 1.E+00 | 1.E+00 | 1.E+00 | 1.E+00 | 1.E+00 | 4.E-02 | 1.E+00 | 1.E+00 | 1.E+00 | 1.E+00 |
| GO:0007286  | spermatid development                                  | BP | 1.E+00 | 1.E+00 | 1.E+00 | 1.E+00 | 1.E+00 | 1.E+00 | 4.E-02 | 1.E+00 | 1.E+00 | 1.E+00 | 1.E+00 |
| GO:0008023  | transcription elongation factor complex                | CC | 1.E+00 | 1.E+00 | 1.E+00 | 1.E+00 | 1.E+00 | 1.E+00 | 4.E-02 | 1.E+00 | 1.E+00 | 1.E+00 | 1.E+00 |
| GO:0003896  | DNA primase activity                                   | MF | 1.E+00 | 1.E+00 | 1.E+00 | 1.E+00 | 1.E+00 | 1.E+00 | 5.E-02 | 1.E+00 | 1.E+00 | 1.E+00 | 1.E+00 |
| GO:0015012  | heparan sulfate proteoglycan biosynthetic process      | BP | 1.E+00 | 1.E+00 | 1.E+00 | 1.E+00 | 1.E+00 | 1.E+00 | 2.E-03 | 5.E-02 | 1.E+00 | 1.E+00 | 1.E+00 |
| GO:0030507  | spectrin binding                                       | MF | 1.E+00 | 1.E+00 | 1.E+00 | 1.E+00 | 1.E+00 | 1.E+00 | 7.E-04 | 6.E-02 | 1.E+00 | 1.E+00 | 1.E+00 |
| GO:0045199  | maintenance of epithelial cell polarity                | BP | 1.E+00 | 1.E+00 | 1.E+00 | 1.E+00 | 1.E+00 | 1.E+00 | 7.E-04 | 6.E-02 | 1.E+00 | 1.E+00 | 1.E+00 |
| GO:0019221  | cytokine and chemokine mediated signaling pathway      | BP | 1.E+00 | 1.E+00 | 1.E+00 | 1.E+00 | 1.E+00 | 1.E+00 | 5.E-05 | 7.E-02 | 1.E+00 | 1.E+00 | 1.E+00 |
| GO:0016573  | histone acetylation                                    | BP | 1.E+00 | 1.E+00 | 1.E+00 | 1.E+00 | 1.E+00 | 1.E+00 | 9.E-04 | 8.E-02 | 1.E+00 | 1.E+00 | 1.E+00 |
| GO:0006207  | 'de novo' pyrimidine base biosynthetic process         | BP | 1.E+00 | 1.E+00 | 1.E+00 | 1.E+00 | 1.E+00 | 1.E+00 | 2.E-02 | 1.E-01 | 1.E+00 | 1.E+00 | 1.E+00 |
| GO:0004614  | phosphoglucomutase activity                            | MF | 1.E+00 | 1.E+00 | 1.E+00 | 1.E+00 | 1.E+00 | 1.E+00 | 5.E-03 | 2.E-01 | 1.E+00 | 1.E+00 | 1.E+00 |
| GO:0005020  | stem cell factor receptor activity                     | MF | 1.E+00 | 1.E+00 | 1.E+00 | 1.E+00 | 1.E+00 | 1.E+00 | 3.E-05 | 4.E-01 | 1.E+00 | 1.E+00 | 1.E+00 |
| GO:0051539  | 4 iron, 4 sulfur cluster binding                       | MF | 1.E+00 | 1.E+00 | 1.E+00 | 1.E+00 | 1.E+00 | 1.E+00 | 1.E-03 | 4.E-01 | 1.E+00 | 1.E+00 | 1.E+00 |
| GO:0004968  | gonadotropin-releasing hormone receptor activity       | MF | 1.E+00 | 1.E+00 | 1.E+00 | 1.E+00 | 1.E+00 | 1.E+00 | 7.E-03 | 5.E-01 | 1.E+00 | 1.E+00 | 1.E+00 |
| GO:0005018  | platelet-derived growth factor alpha-receptor activity | MF | 1.E+00 | 1.E+00 | 1.E+00 | 1.E+00 | 1.E+00 | 1.E+00 | 5.E-07 | 7.E-01 | 1.E+00 | 1.E+00 | 1.E+00 |
| GO:0048407  | platelet-derived growth factor binding                 | MF | 1.E+00 | 1.E+00 | 1.E+00 | 1.E+00 | 1.E+00 | 1.E+00 | 5.E-07 | 7.E-01 | 1.E+00 | 1.E+00 | 1.E+00 |
| GO:0004610  | phosphoacetylglucosamine mutase activity               | MF | 1.E+00 | 1.E+00 | 1.E+00 | 1.E+00 | 1.E+00 | 1.E+00 | 6.E-05 | 7.E-01 | 1.E+00 | 1.E+00 | 1.E+00 |
| GO:0006041  | glucosamine metabolic process                          | BP | 1.E+00 | 1.E+00 | 1.E+00 | 1.E+00 | 1.E+00 | 1.E+00 | 6.E-05 | 7.E-01 | 1.E+00 | 1.E+00 | 1.E+00 |
| GO:0019255  | glucose 1-phosphate metabolic process                  | BP | 1.E+00 | 1.E+00 | 1.E+00 | 1.E+00 | 1.E+00 | 1.E+00 | 6.E-05 | 7.E-01 | 1.E+00 | 1.E+00 | 1.E+00 |
| GO:0019834  | phospholipase A2 inhibitor activity                    | MF | 1.E+00 | 1.E+00 | 1.E+00 | 1.E+00 | 1.E+00 | 1.E+00 | 3.E-10 | 1.E+00 | 1.E+00 | 1.E+00 | 1.E+00 |
| GO:0008486  | diphosphoinositol-polyphosphate diphosphatase activ    | MF | 1.E+00 | 1.E+00 | 1.E+00 | 1.E+00 | 1.E+00 | 1.E+00 | 5.E-10 | 1.E+00 | 1.E+00 | 1.E+00 | 1.E+00 |
| GO:0003727  | single-stranded RNA binding                            | MF | 1.E+00 | 1.E+00 | 1.E+00 | 1.E+00 | 1.E+00 | 1.E+00 | 3.E-08 | 1.E+00 | 1.E+00 | 1.E+00 | 1.E+00 |
| GO:0007568  | aging                                                  | BP | 1.E+00 | 1.E+00 | 1.E+00 | 1.E+00 | 1.E+00 | 1.E+00 | 8.E-08 | 1.E+00 | 1.E+00 | 1.E+00 | 1.E+00 |
| GO:0047536  | 2-aminoadipate transaminase activity                   | MF | 1.E+00 | 1.E+00 | 1.E+00 | 1.E+00 | 1.E+00 | 1.E+00 | 3.E-07 | 1.E+00 | 1.E+00 | 1.E+00 | 1.E+00 |
| GO:0004473  | malate dehydrogenase (oxaloacetate-decarboxylating)    | MF | 1.E+00 | 1.E+00 | 1.E+00 | 1.E+00 | 1.E+00 | 1.E+00 | 3.E-06 | 1.E+00 | 1.E+00 | 1.E+00 | 1.E+00 |
| GO:0006741  | NADP biosynthetic process                              | BP | 1.E+00 | 1.E+00 | 1.E+00 | 1.E+00 | 1.E+00 | 1.E+00 | 3.E-06 | 1.E+00 | 1.E+00 | 1.E+00 | 1.E+00 |
| GO:0009743  | response to carbohydrate stimulus                      | BP | 1.E+00 | 1.E+00 | 1.E+00 | 1.E+00 | 1.E+00 | 1.E+00 | 3.E-06 | 1.E+00 | 1.E+00 | 1.E+00 | 1.E+00 |
| GO:0006108  | malate metabolic process                               | BP | 1.E+00 | 1.E+00 | 1.E+00 | 1.E+00 | 1.E+00 | 1.E+00 | 5.E-06 | 1.E+00 | 1.E+00 | 1.E+00 | 1.E+00 |
| GO:0004370  | glycerol kinase activity                               | MF | 1.E+00 | 1.E+00 | 1.E+00 | 1.E+00 | 1.E+00 | 1.E+00 | 2.E-05 | 1.E+00 | 1.E+00 | 1.E+00 | 1.E+00 |
| GO:0000133  | polarisome                                             | CC | 1.E+00 | 1.E+00 | 1.E+00 | 1.E+00 | 1.E+00 | 1.E+00 | 5.E-05 | 1.E+00 | 1.E+00 | 1.E+00 | 1.E+00 |
| GO:0004700  | atypical protein kinase C activity                     | MF | 1.E+00 | 1.E+00 | 1.E+00 | 1.E+00 | 1.E+00 | 1.E+00 | 5.E-05 | 1.E+00 | 1.E+00 | 1.E+00 | 1.E+00 |
| GO:0045216  | intercellular junction assembly and maintenance        | BP | 1.E+00 | 1.E+00 | 1.E+00 | 1.E+00 | 1.E+00 | 1.E+00 | 5.E-05 | 1.E+00 | 1.E+00 | 1.E+00 | 1.E+00 |
| GO:0005639  | integral to nuclear inner membrane                     | CC | 1.E+00 | 1.E+00 | 1.E+00 | 1.E+00 | 1.E+00 | 1.E+00 | 6.E-05 | 1.E+00 | 1.E+00 | 1.E+00 | 1.E+00 |
| GO:0048665  | neuron fate specification                              | BP | 1.E+00 | 1.E+00 | 1.E+00 | 1.E+00 | 1.E+00 | 1.E+00 | 2.E-04 | 1.E+00 | 1.E+00 | 1.E+00 | 1.E+00 |
| GO:0008449  | N-acetylglucosamine-6-sulfatase activity               | MF | 1.E+00 | 1.E+00 | 1.E+00 | 1.E+00 | 1.E+00 | 1.E+00 | 2.E-04 | 1.E+00 | 1.E+00 | 1.E+00 | 1.E+00 |
| GO:0004470  | malic enzyme activity                                  | MF | 1.E+00 | 1.E+00 | 1.E+00 | 1.E+00 | 1.E+00 | 1.E+00 | 2.E-04 | 1.E+00 | 1.E+00 | 1.E+00 | 1.E+00 |
| GO:0004692  | cGMP-dependent protein kinase activity                 | MF | 1.E+00 | 1.E+00 | 1.E+00 | 1.E+00 | 1.E+00 | 1.E+00 | 8.E-04 | 1.E+00 | 1.E+00 | 1.E+00 | 1.E+00 |
| GO:0043325  | phosphatidylinositol-3,4-bisphosphate binding          | MF | 1.E+00 | 1.E+00 | 1.E+00 | 1.E+00 | 1.E+00 | 1.E+00 | 1.E-03 | 1.E+00 | 1.E+00 | 1.E+00 | 1.E+00 |
| GO:0050509  | N-acetylglucosaminyl-proteoglycan 4-beta-glucuronos    | MF | 1.E+00 | 1.E+00 | 1.E+00 | 1.E+00 | 1.E+00 | 1.E+00 | 3.E-03 | 1.E+00 | 1.E+00 | 1.E+00 | 1.E+00 |
| GO:0005547  | phosphatidylinositol-3,4,5-triphosphate binding        | MF | 1.E+00 | 1.E+00 | 1.E+00 | 1.E+00 | 1.E+00 | 1.E+00 | 3.E-03 | 1.E+00 | 1.E+00 | 1.E+00 | 1.E+00 |
| GO:0010001  | glial cell differentiation                             | BP | 1.E+00 | 1.E+00 | 1.E+00 | 1.E+00 | 1.E+00 | 1.E+00 | 5.E-03 | 1.E+00 | 1.E+00 | 1.E+00 | 1.E+00 |
| GO:0045663  | positive regulation of myoblast differentiation        | BP | 1.E+00 | 1.E+00 | 1.E+00 | 1.E+00 | 1.E+00 | 1.E+00 | 6.E-03 | 1.E+00 | 1.E+00 | 1.E+00 | 1.E+00 |
| GO:0016616  | oxidoreductase activity, acting on the CH-OH group of  | MF | 1.E+00 | 1.E+00 | 1.E+00 | 1.E+00 | 1.E+00 | 1.E+00 | 6.E-03 | 1.E+00 | 1.E+00 | 1.E+00 | 1.E+00 |
| GO:0006072  | glycerol-3-phosphate metabolic process                 | BP | 1.E+00 | 1.E+00 | 1.E+00 | 1.E+00 | 1.E+00 | 1.E+00 | 6.E-03 | 1.E+00 | 1.E+00 | 1.E+00 | 1.E+00 |
| GO:0004653  | polypeptide N-acetylglactosaminyltransferase activity  | MF | 1.E+00 | 1.E+00 | 1.E+00 | 1.E+00 | 1.E+00 | 1.E+00 | 6.E-03 | 1.E+00 | 1.E+00 | 1.E+00 | 1.E+00 |

|            |                                                      |    |        |        |        |        |        |        |        |        |        |        |        |
|------------|------------------------------------------------------|----|--------|--------|--------|--------|--------|--------|--------|--------|--------|--------|--------|
| GO:0008543 | fibroblast growth factor receptor signaling pathway  | BP | 1.E+00 | 1.E-02 | 1.E+00 | 1.E+00 | 1.E+00 |
| GO:0030539 | male genitalia development                           | BP | 1.E+00 | 2.E-02 | 1.E+00 | 1.E+00 | 1.E+00 |
| GO:0006024 | glycosaminoglycan biosynthetic process               | BP | 1.E+00 | 3.E-02 | 1.E+00 | 1.E+00 | 1.E+00 |
| GO:0004859 | phospholipase inhibitor activity                     | MF | 1.E+00 | 5.E-02 | 1.E+00 | 1.E+00 | 1.E+00 |
| GO:0005487 | nucleocytoplasmic transporter activity               | MF | 1.E+00 | 1.E-01 | 1.E-02 | 1.E+00 | 1.E+00 |
| GO:0004713 | protein-tyrosine kinase activity                     | MF | 1.E+00 | 1.E-01 | 6.E-04 | 1.E+00 | 1.E+00 |
| GO:0015917 | aminophospholipid transport                          | BP | 1.E+00 | 3.E-01 | 2.E-03 | 1.E+00 | 1.E+00 |
| GO:0005887 | integral to plasma membrane                          | CC | 1.E+00 | 5.E-12 | 1.E+00 | 1.E+00 |
| GO:0005515 | protein binding                                      | MF | 1.E+00 | 3.E-09 | 1.E+00 | 1.E+00 |
| GO:0006820 | anion transport                                      | BP | 1.E+00 | 7.E-05 | 1.E+00 | 1.E+00 |
| GO:0005834 | heterotrimeric G-protein complex                     | CC | 1.E+00 | 2.E-04 | 1.E+00 | 1.E+00 |
| GO:0018107 | peptidyl-threonine phosphorylation                   | BP | 1.E+00 | 1.E-03 | 1.E+00 | 1.E+00 |
| GO:0043508 | negative regulation of JNK activity                  | BP | 1.E+00 | 1.E-03 | 1.E+00 | 1.E+00 |
| GO:0015380 | anion exchanger activity                             | MF | 1.E+00 | 2.E-03 | 1.E+00 | 1.E+00 |
| GO:0005452 | inorganic anion exchanger activity                   | MF | 1.E+00 | 2.E-03 | 1.E+00 | 1.E+00 |
| GO:0045749 | negative regulation of S phase of mitotic cell cycle | BP | 1.E+00 | 2.E-02 | 1.E+00 | 1.E+00 |
| GO:0006904 | vesicle docking during exocytosis                    | BP | 1.E+00 | 2.E-02 | 1.E+00 | 1.E+00 |
| GO:0030097 | hemopoiesis                                          | BP | 1.E+00 | 3.E-02 | 1.E+00 | 1.E+00 |
| GO:0004012 | phospholipid-translocating ATPase activity           | MF | 1.E+00 | 5.E-02 | 1.E+00 | 1.E+00 |
| GO:0050662 | coenzyme binding                                     | MF | 1.E+00 | 2.E-01 | 3.E-03 |

### Supplementary Figures

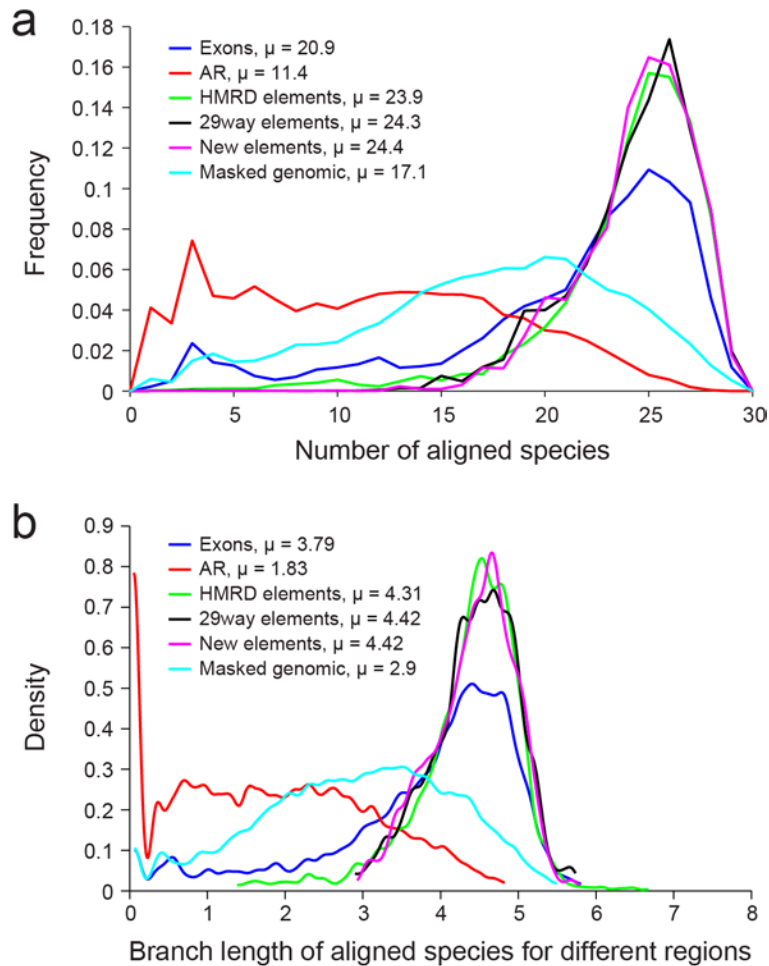

**Figure S1 - Evolutionary rate and depth of the 29 mammals multiple alignment in different features in the human genome. a,** The number of aligned species for each base in the genome is reported for different features such as neutrally evolving repeats (AR, in red), the whole genome (light blue), exons (dark blue) and non-coding conserved elements (green=top 5% of HMRD elements, black=29mammals elements, purple=newly detected bases). Note that the numbers of aligned species increases with the functional importance of each feature, suggesting that the power is highest over functional elements. **b,** The evolutionary depth for each base in the genome is reported for different features such as neutrally evolving repeats (AR, in red), the whole genome (light blue), exons (dark blue) and non-coding conserved elements (green=top 5% of HMRD elements, black=29mammals elements, purple=newly detected bases). Note that the evolutionary depth increases with the functional importance of each feature, suggesting that the power is highest over functional elements.

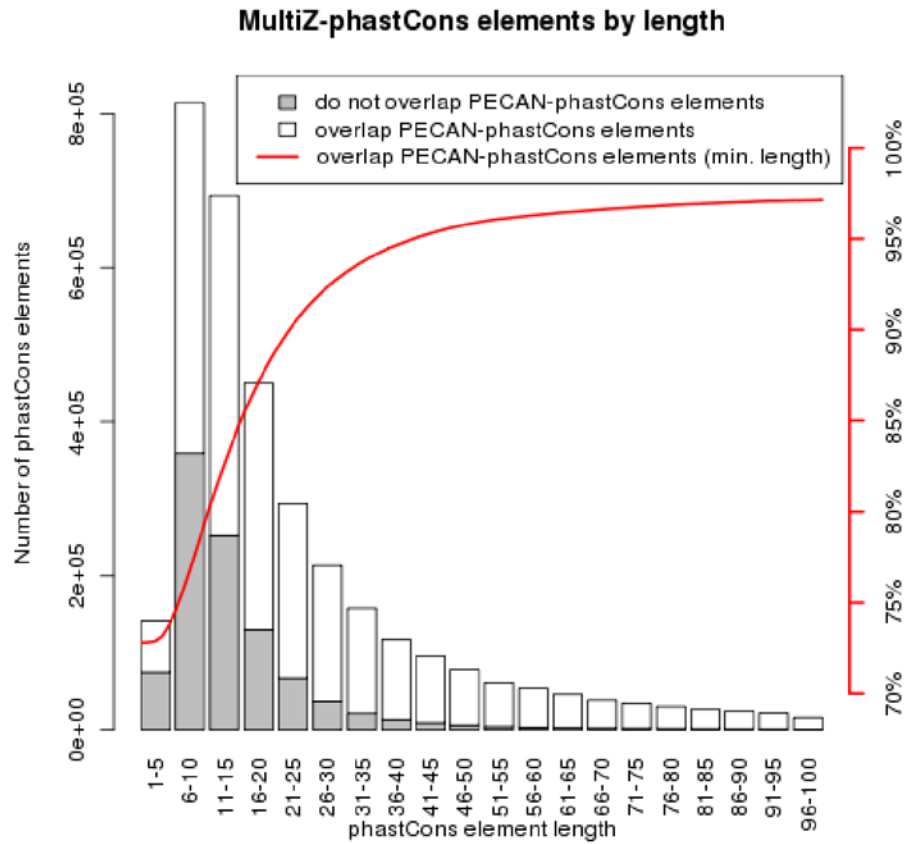

**Figure S2 - Comparison between phastCons elements in MultiZ and in PECAN alignments.** Histogram of MultiZ-phastCons elements by size, divided into the elements that overlap a PECAN-phastCons element (white bars) and those that do not (grey bars). Also shown in red, the percentage of MultiZ-phastCons elements in agreement with a Pecan-phastCons element as a function of the minimum length of the elements. The agreement between the elements is defined as an overlap of at least 1 nucleotide.

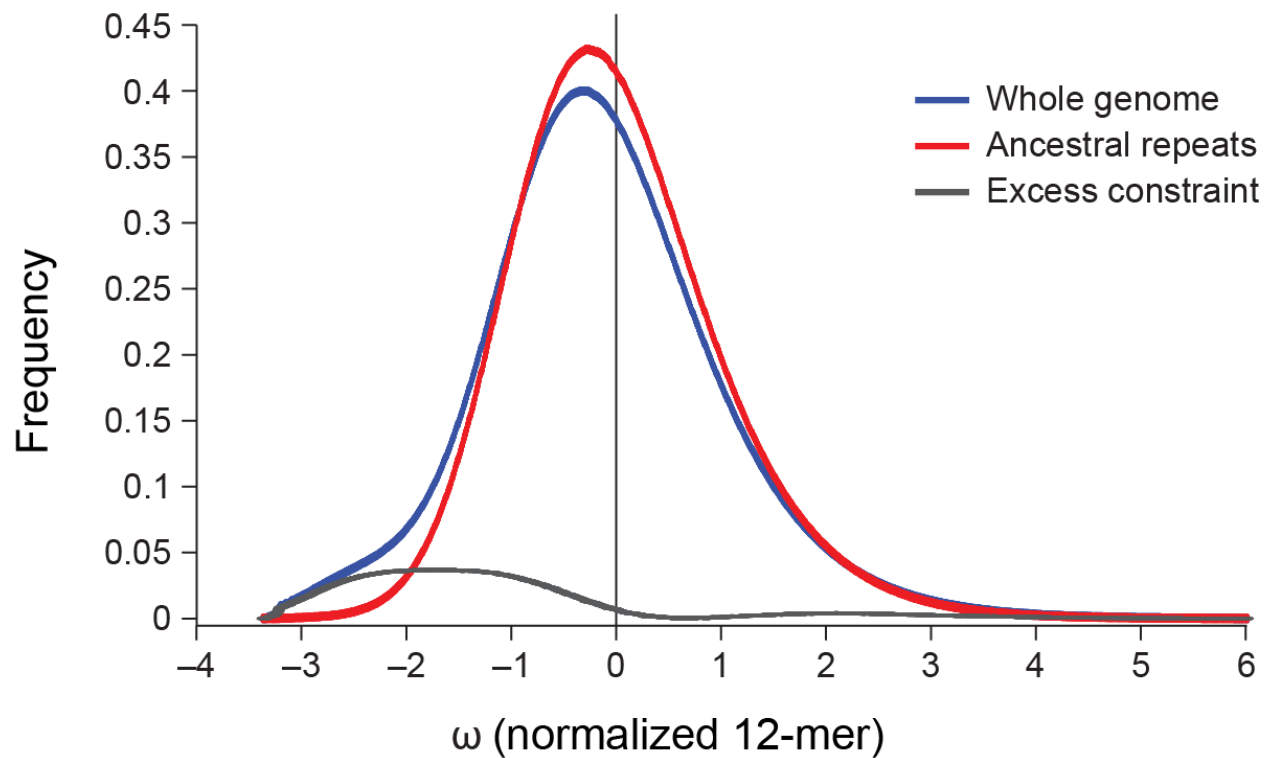

**Supplementary Figure S3 - Estimation and detection of constraint.** Roughly 5.5% of the genome is estimated to be under constraint using SiPhy- $\omega$  with 12-bp windows. The constraint score for ancient repeats is shown in red and the whole genome in blue.



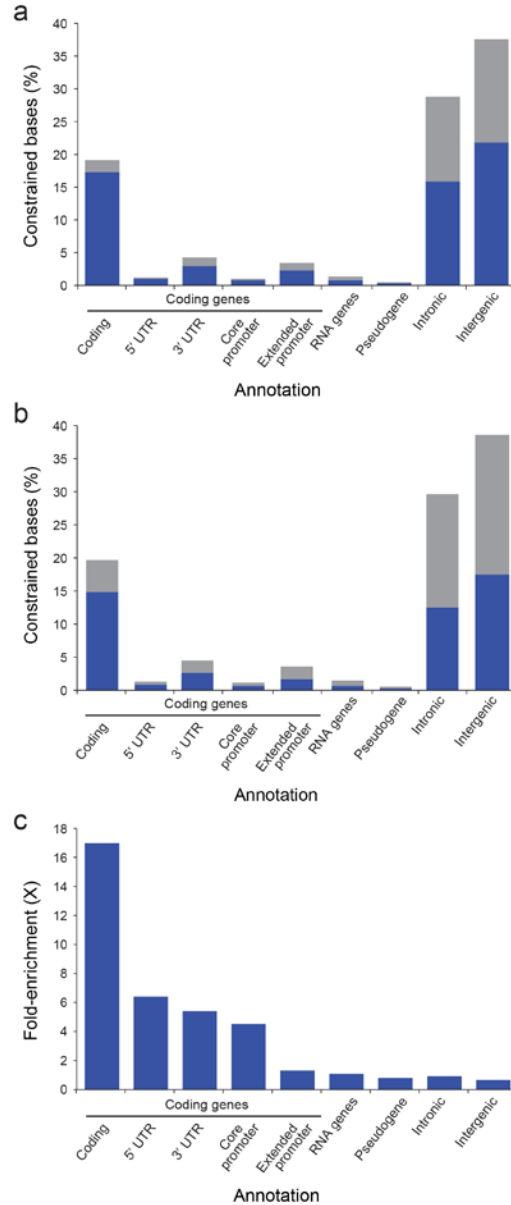

**Supplementary Figure S4 - Identification of constrained SiPhy- $\omega$  elements.** At 10% FDR, 3.6 million constrained SiPhy- $\omega$  elements (12-bp windows) can be detected. The largest fraction of constraint can be seen in coding exons, introns and intergenic regions. To account for each constrained base uniquely, the analysis was performed hierarchically as follows: coding exons, 5'-UTRs, 3'-UTRs, promoters, pseudogenes, non-coding RNAs, introns, intergenic. **a**, Distribution of constraint with overlap with HMRD 50 bp + Siepel vertebrate elements shown in blue. **b**, Distribution of constraint with overlap with HMRD elements only shown in blue. Please note the similarity of these data sets. **c**, The 29 mammals constrained bases are particularly enriched in coding transcripts and their promoters. The enrichment was generated by comparing the fraction of constrained bases to the total number of bases in the specific genomic annotation.

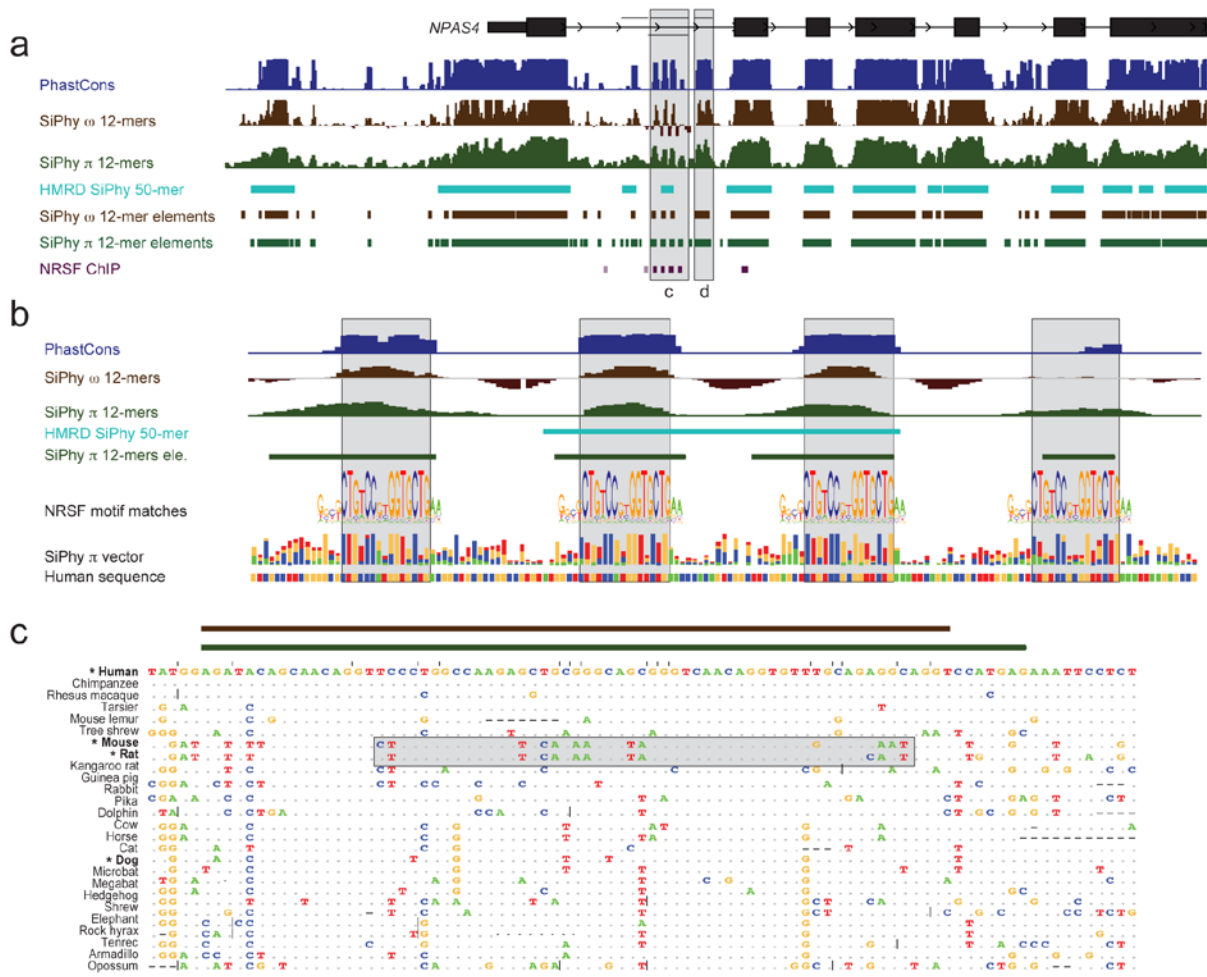

**Supplementary Figure S5 - Estimation of fraction of constraint and identification of four NRSF-binding sites in *NPAS4*.** The neurological gene *NPAS4* has many constrained elements overlapping introns and the upstream intergenic region. Note that the shaded box c contained only one constrained element using HMRD, while analysis of 29 mammalian sequences reveals four smaller elements. **b**, These four constrained elements in the first intron correspond to binding sites for the NRSF transcription factor, known to regulate neuronal lineages. **c**, Another 70 bp constrained element in the first intron, marked as shaded box d in panel b, was not detected in the HMRD analysis due to unusually high divergence in mouse and rat, but is highly constrained in all other mammals and was therefore detected with sequences from 29 mammals.

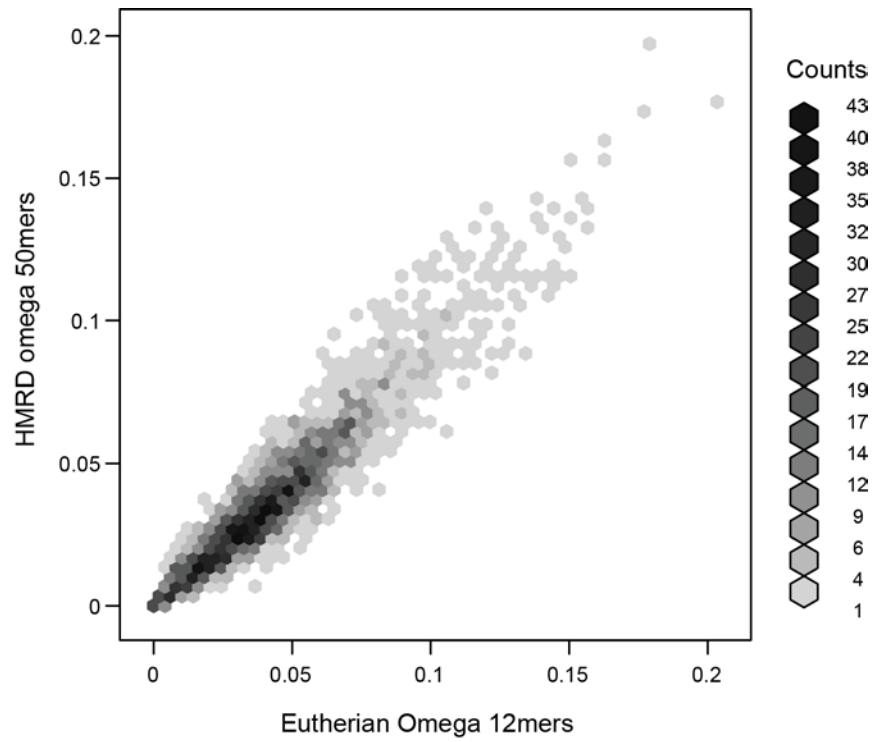

**Supplementary Figure S6 - Correlation between element density in 29 mammals and HMRD data sets.** The correlation for each megabase in the genome between 29-way eutherian 12mer based element density and HMRD 50mer element density was computed and plotted.

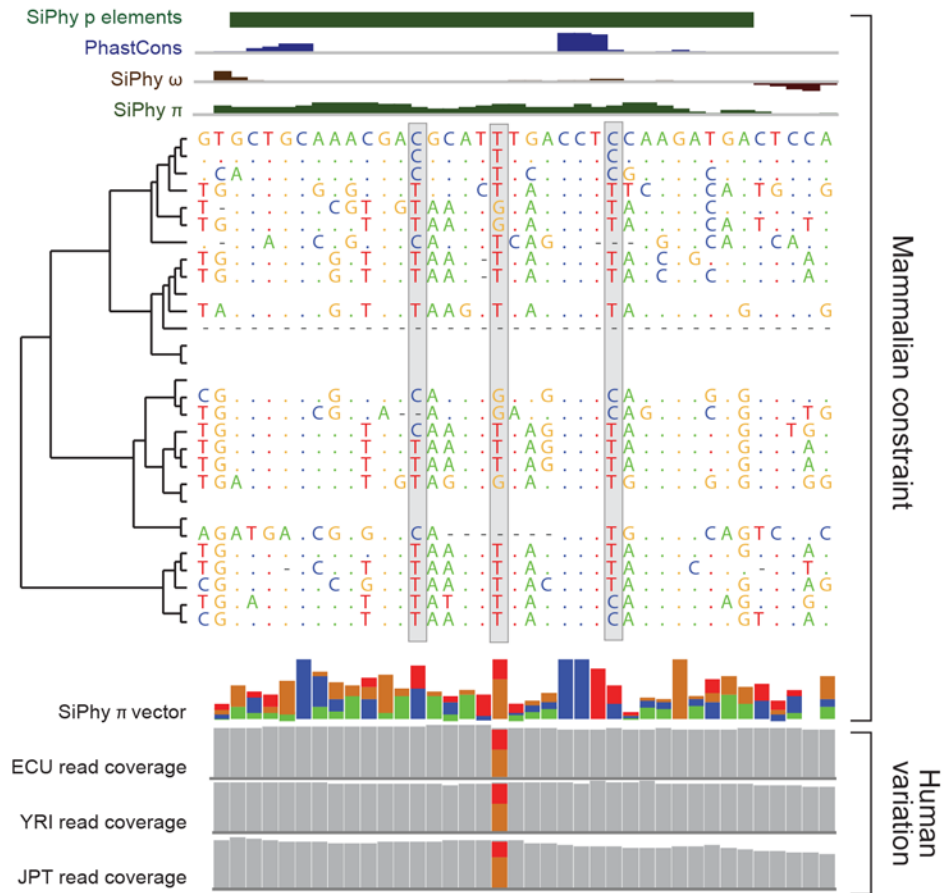

**Supplementary Figure S7. Biased nucleotide substitution patterns identifies positions where two bases appear equally constrained and correlating with SNPs in the human population.** An example of an intergenic SiPhy- $\pi$  element (HG18 chr12:1,916,342-1,916,380) detected based on the presence of three 2-fold degenerate constrained bases. Note how these bases (in grey boxes) alternate between bases across the evolutionary tree. One of the degenerate bases matches a SNP present in several human populations, European CEPF (ECU), Yoruban Africans (YRI) and Japanese (JPT).



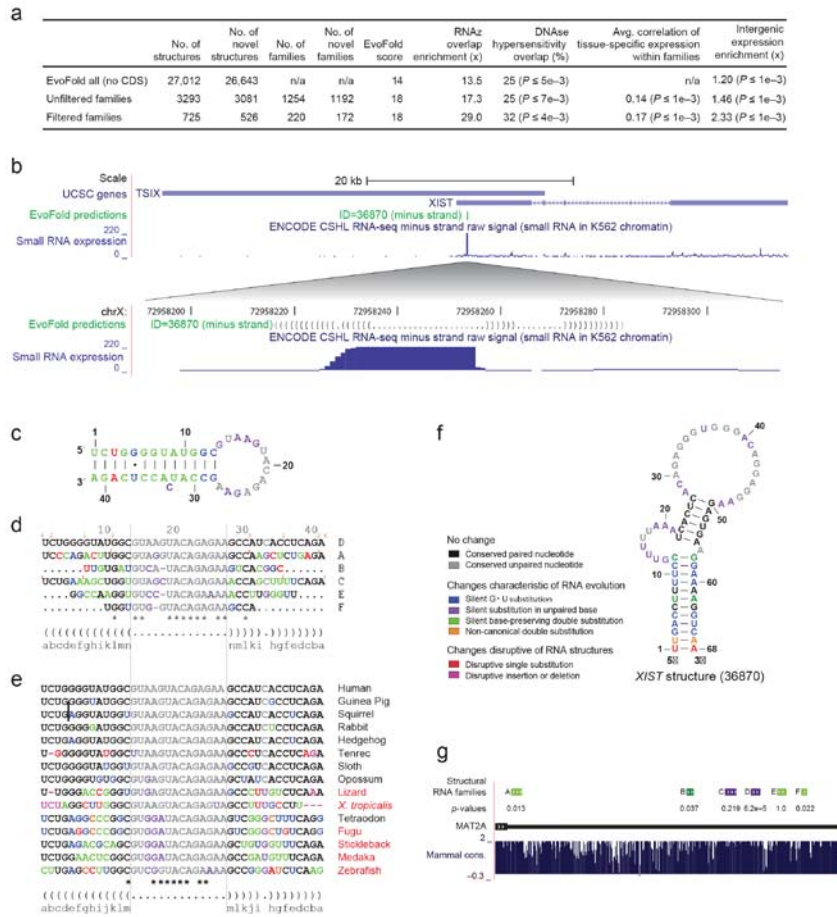

**Supplementary Figure S9 - Over 200 families of potential RNA structural elements were identified.** **a**, Summary and enrichment statistics for structural RNA predictions sets. **b**, Top: The RNA structure (green) is predicted on the *XIST* strand (purple) and overlaps short RNAs (blue) observed at high abundance in the chromatin cellular compartment. Bottom: base-level resolution showing secondary structure in parenthesis notation (black) and the demarcated expression of short RNAs (blue). **c**, Predicted secondary structure for one of six hairpins (hairpin D) in the 3'UTR of the *MAT2A* gene, responsible for the synthesis of S-adenosylmethionine (SAM), the primary methyl donor in human cells. **d**, The human sequences of all six hairpins were aligned using hairpin D as the reference. Insertions relative to D are shown with orange bars and numbers. Fully conserved positions (\*) between the human sequences reveal the same loop region motif. **e** Multiple alignment across vertebrates for hairpin D. **f**, Secondary structure drawing of *XIST* structure with color-coding of substitution evidence (Black= Conserved paired nucleotide, grey= Conserved unpaired nucleotide; blue= Silent G • U substitution; purple= Silent substitution in unpaired base, green = Silent base preserving substitution, Orange= Non-canonical double substitution, Red= Disruptive single substitution, Pink = Disruptive insertion or deletion). **g**, Family of hairpins in 3'UTR of the *MAT2A* gene, responsible for the synthesis of S-adenosylmethionine (SAM), the primary methyl donor in human cells. Purple= initial family members, dark green= family member after paralog search, light green= additional members found by dedicated additional paralog search, with P-values for substitution evidence in species not used for structure inference.



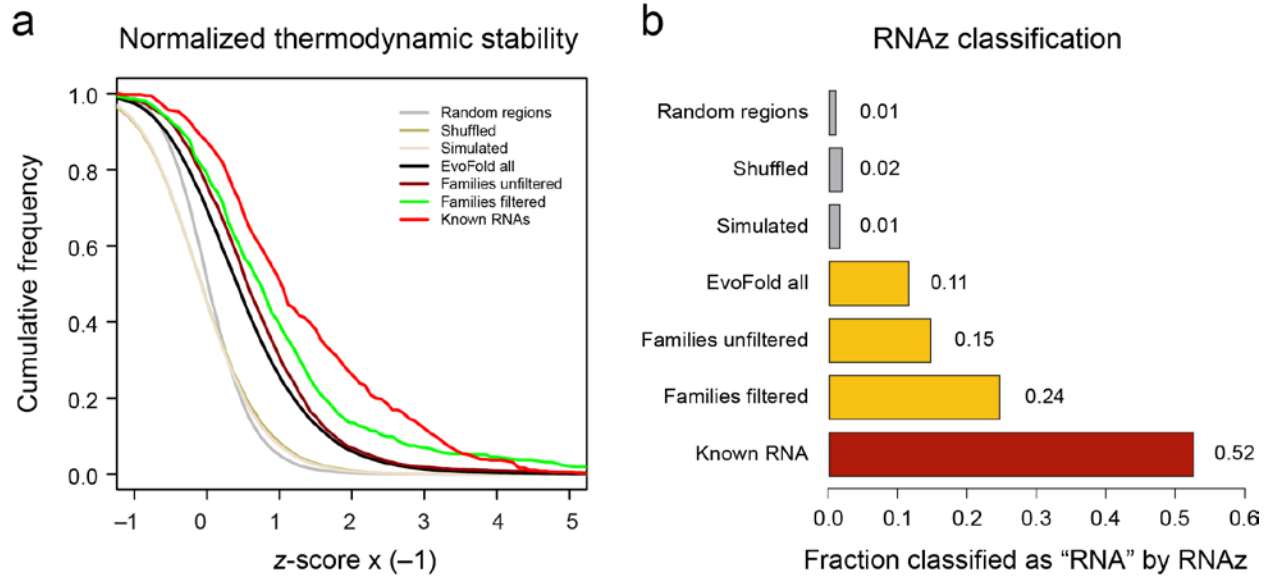

**Supplementary Figure S10 - Thermodynamic analysis of EvoFold predictions using RNAz.**

Left: Cumulative stability z-score distribution for all EvoFold structures structures, structures clustered in families (before and after additional filtering), and positive and negative controls. More negative z-score indicate more stable RNA structures. Right: Fraction of structures predicted as "Functional RNA" by RNAz for the different sets.

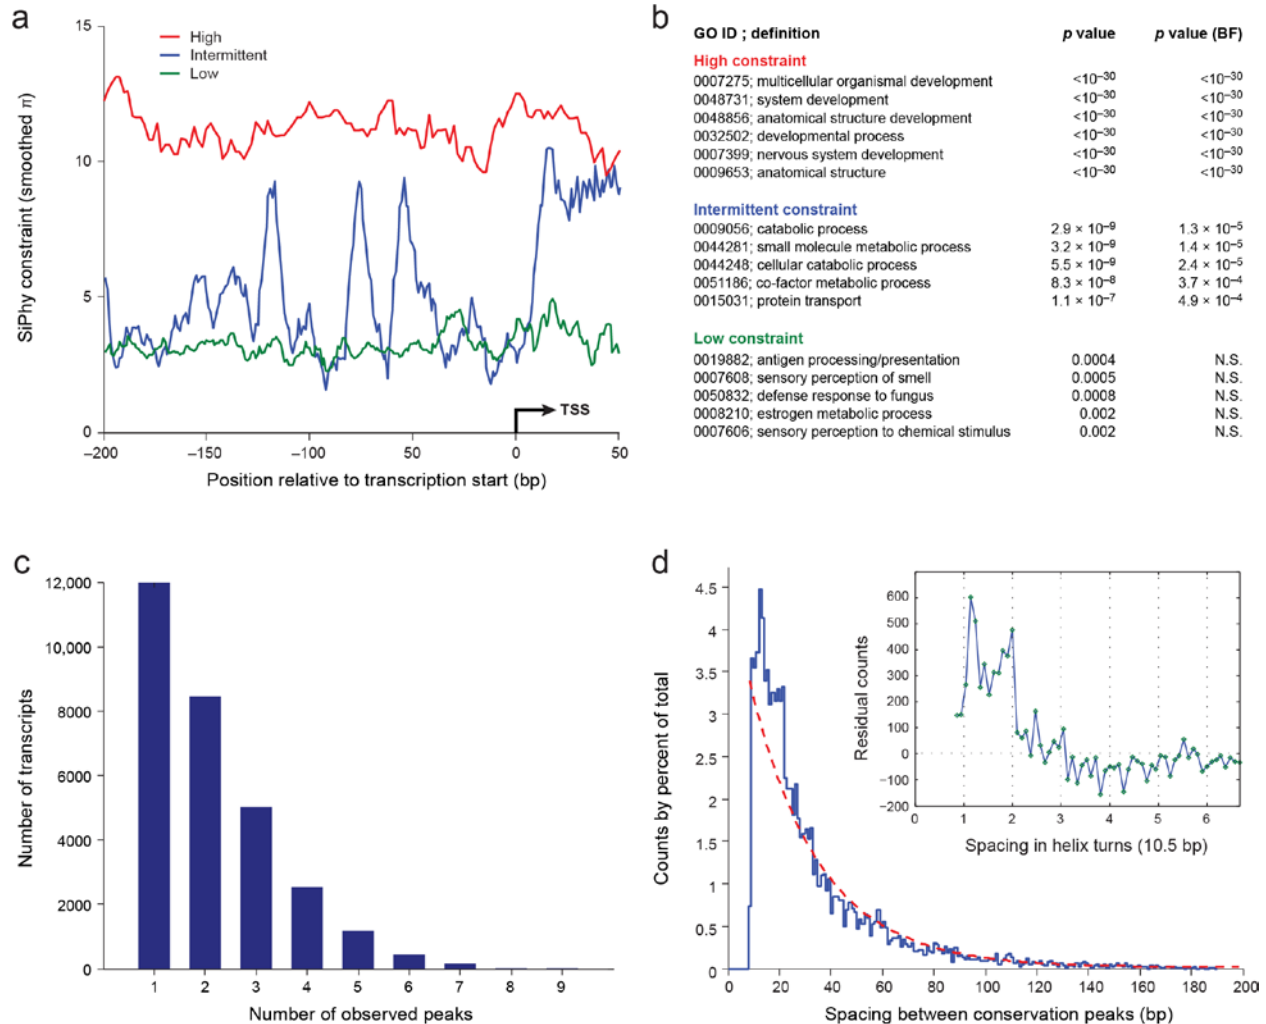

**Supplementary Figure S11 - Differing constraint patterns are observed in core promoters.** **a**, Analysis of promoters for 47,945 transcripts identified three patterns of high (red), intermittent (blue) and low (green) constraint. **b**, The different promoter types were enriched for different types of genes, with developmental genes significantly associated with high constraint, basic cell function and metabolic processes associated with intermittent constraint, and low constraint promoter overrepresented for sensory and immune response genes. **c**, The genes with intermittent constraint had between 1-9 peaks of constraint within the 200 bp core promoter. **d**, The spacing between constraint peaks varies between 9 and 200 bp, with a strong enrichment compared to an exponential distribution (cyan line), and local maxima at 12 and 21 bp distance between peaks (inset), corresponding to roughly one and two turns of the helix. Residual counts are obtained by subtracting the shown exponential from the spacing distribution curve.



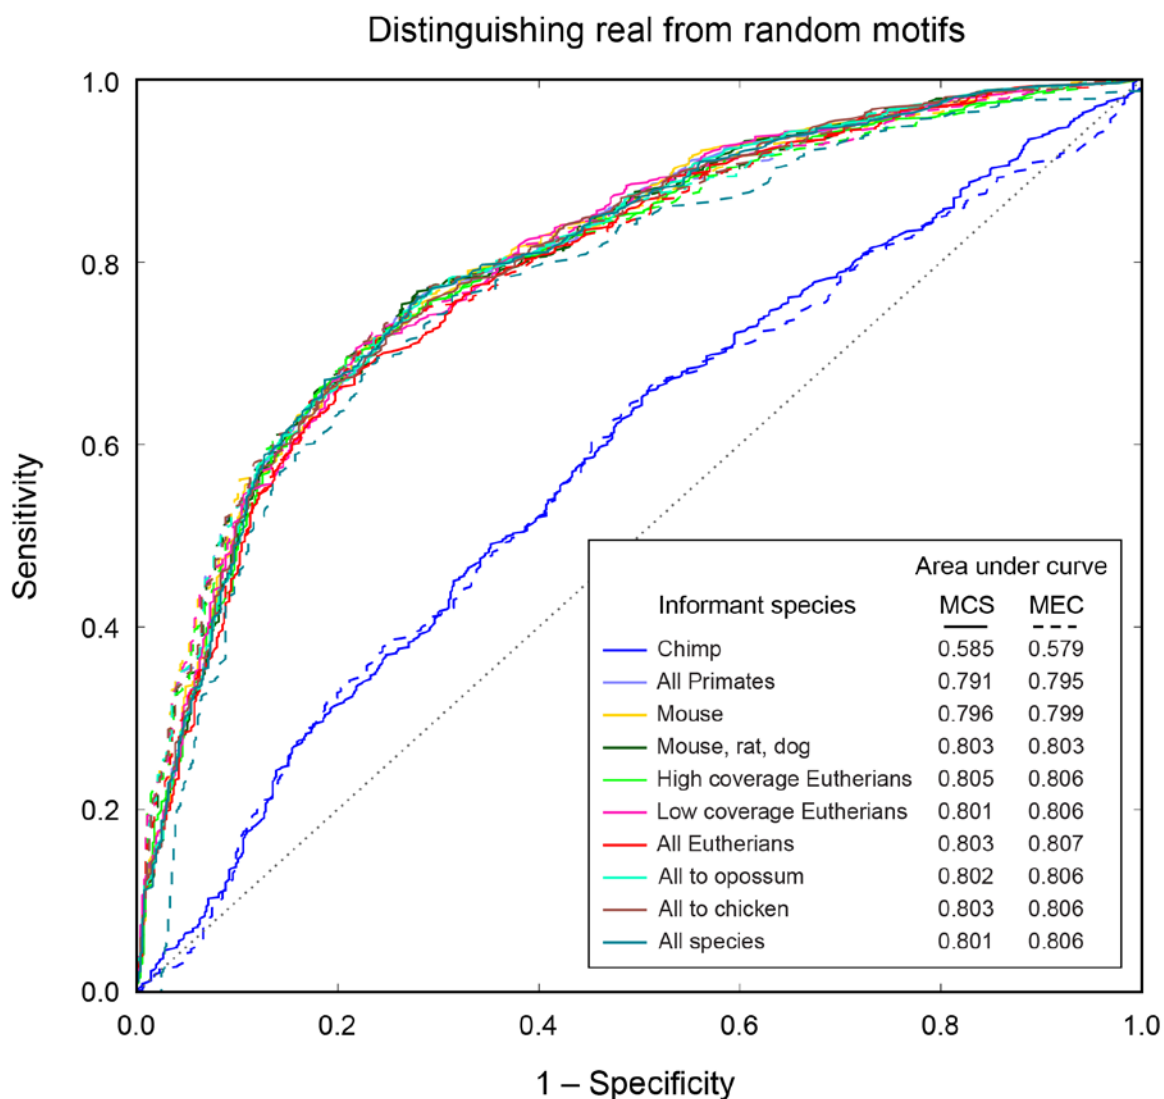

**Supplementary Figure S12 - Limited number of species necessary to separate known and random motifs on the basis of conservation.** ROC curves comparing different informant species subsets in identifying real motifs (contrasted to motif instances). Two methods are used to score motifs: MCS<sup>54</sup> in solid lines or MEC<sup>55</sup> in dashed lines. All motifs with at least two shuffles (N = 577) in the known motif database were scored genome-wide to show a preference for being conserved at the optimal branch length score (in terms of AUC) for each species subset. Additionally, shuffles of these motifs were scored using the same criterion. Using only mouse, rat, and dog as informant species performs essentially identically to using the entire Eutherian tree in separating the known and shuffled motifs. Indeed, even using just a single informant (mouse), has nearly equivalent performance. The two scoring schemes also distinguish between the two motif sets equally well. This demonstrates that at the number of instances and level of conservation seen for motifs in our database, motif discovery will likely not perform better when using motif conservation methods that employ a statistical conservation signal across the instances found genome-wide.

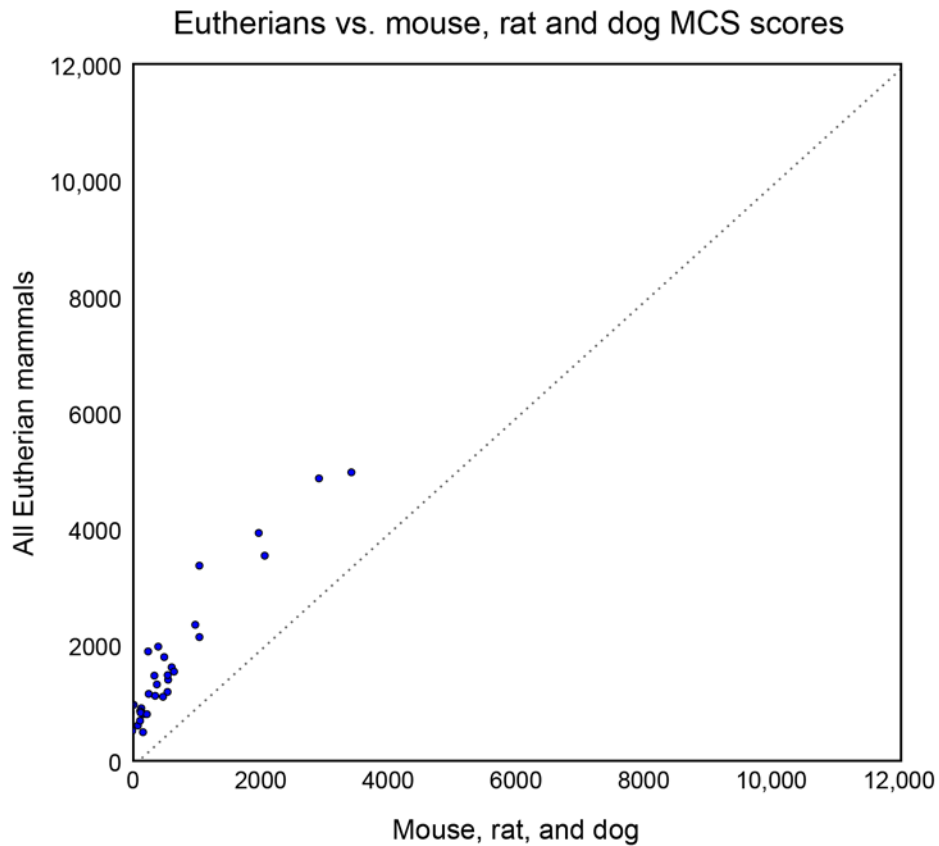

**Supplementary Figure S13 - Motif conservation score (MCS) is strongly correlated when using the entire Eutherian tree or only mouse, rat and dog as informant species.** A correlation of 0.99 is seen between the MCS scores on known motifs computed using all Eutherian informant species and when only using mouse, rat, and dog as informants. This extreme correlation fails to identify motifs that are better suited to be found with the larger Eutherian clade compared to the three species.

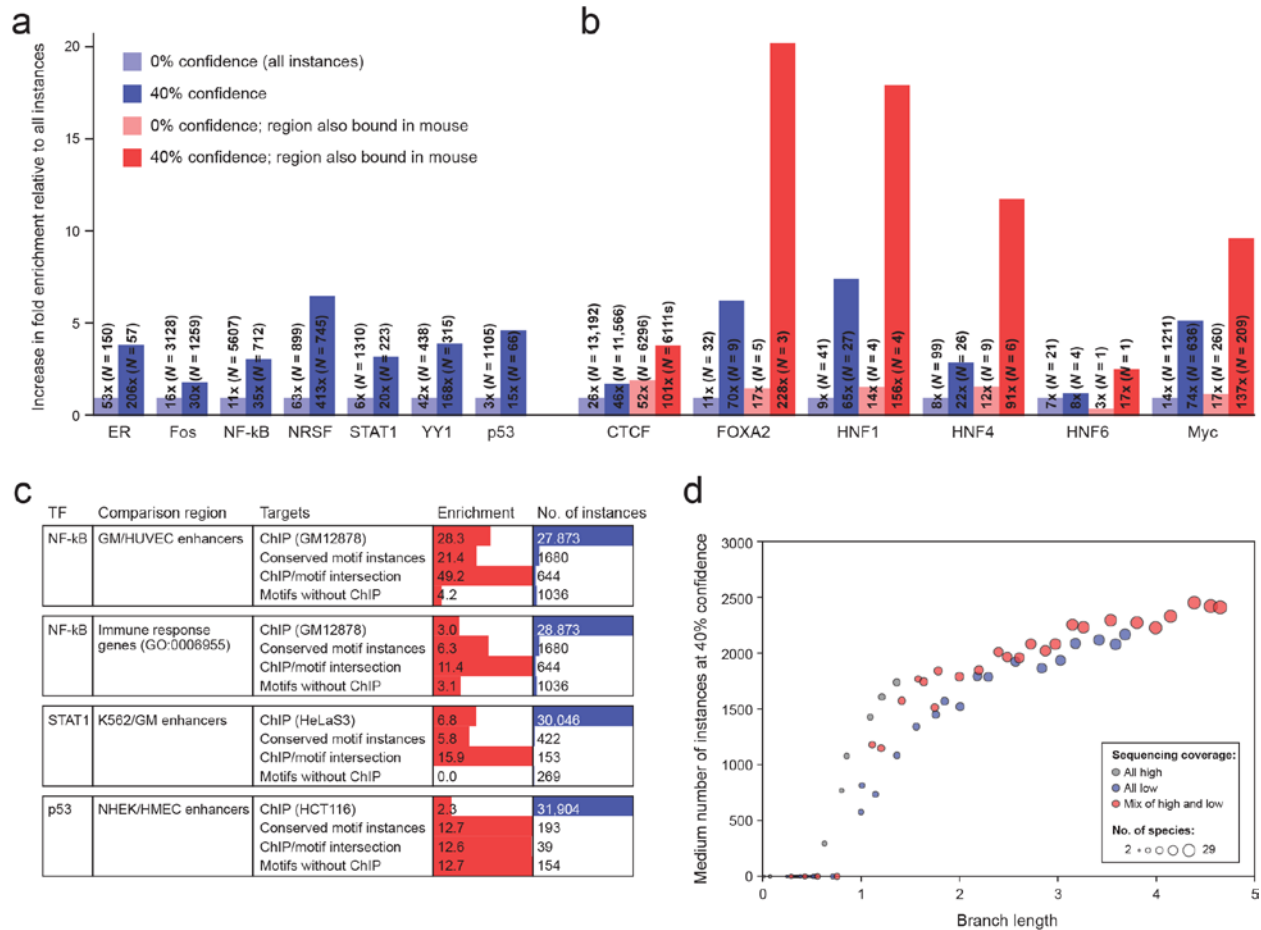

**Supplementary Figure S14 - Regulatory motif instances associated with binding and putative functions.** **a**, Enrichment of motifs in published experimental data sets. Known motifs for each factor show an enrichment in experimental data sets, which increases with conservation. **b**, Enrichment further increases for regions that are bound both in human and in the orthologous positions in mouse. **c**, Comparison of ChIP and conserved motif instances in identifying regions and genes likely to be bound by a factor. **d**, Scaling of motif instances using different species subsets. Comparison of high and low coverage species demonstrates the value of having low coverage species.

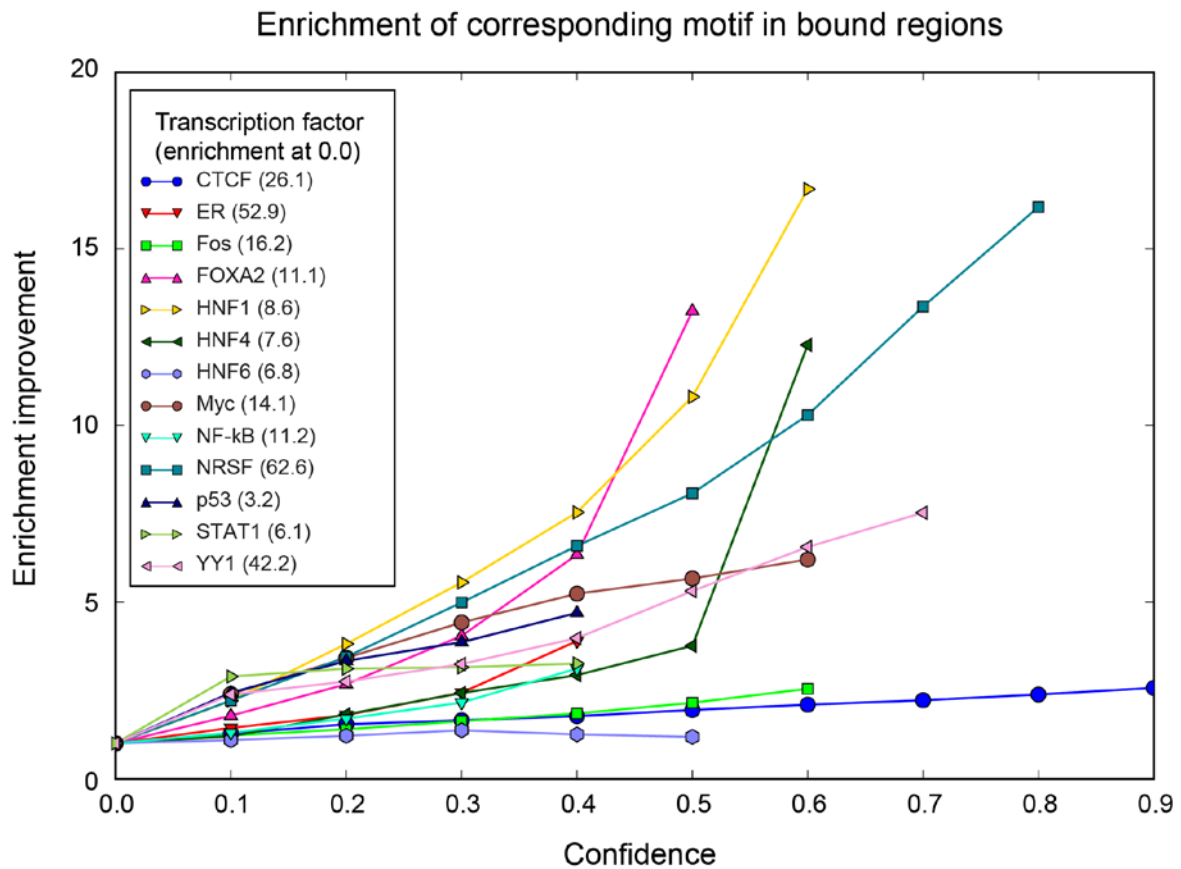

**Supplementary Figure S15 - Increase in enrichment of motif instances across several factors.** Motif enrichments are divided by enrichment at 0.0 confidence (i.e. all motif instances). Most factors show consistent and substantial increases in enrichment with increasing confidence. Considering only 0.0 and 0.4 confidence values leads to Supplementary Figure S12a.

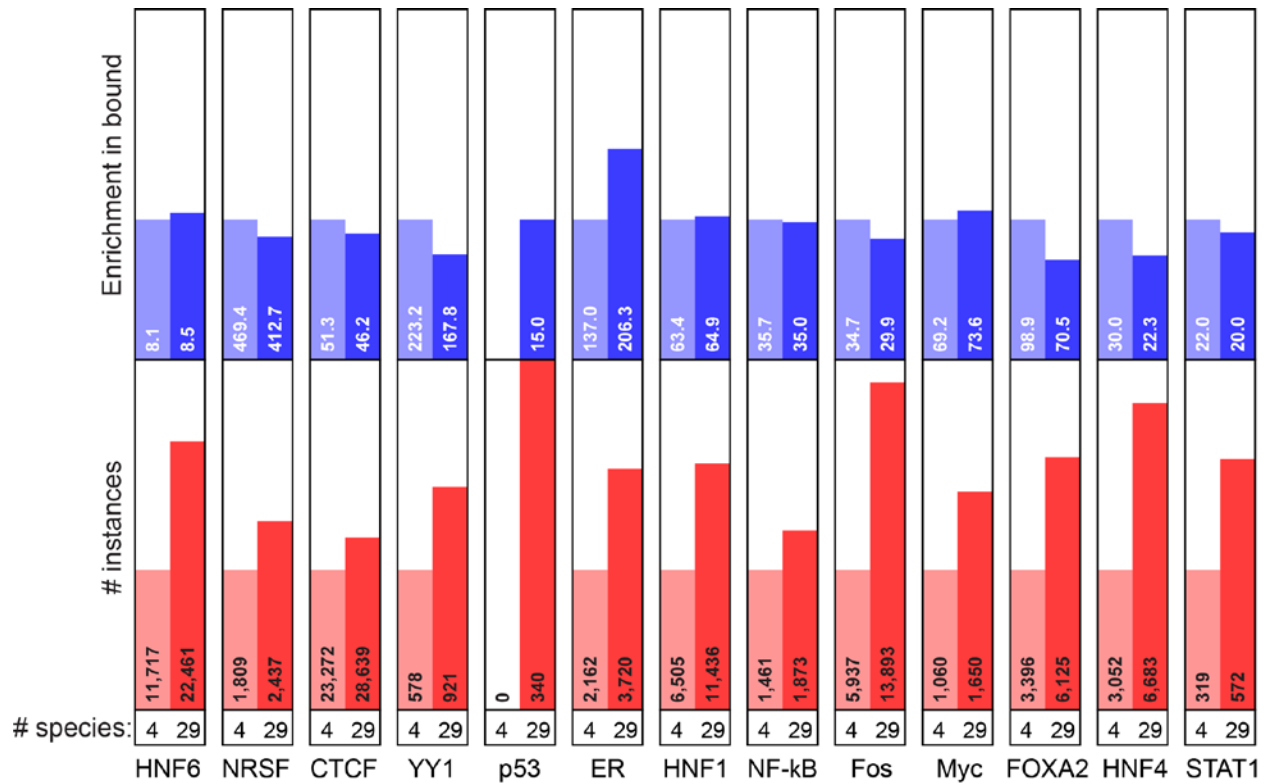

**Supplementary Figure S16 - Comparison of number of motif instances and enrichment of motifs at 40% confidence using either 4 species (human, mouse, rat, and dog) or 29 species (all Eutherian mammals).** The number of motif instances (shown in red bars; normalized height to 4 species number) always increases when going from 4 species to 29. Conversely, the enrichment (shown in blue bars) does not show a clear preference for either species. This is consistent with the expectation that motif instances be equally good regardless of the species subset used to identify them as long as their confidence level is the same.

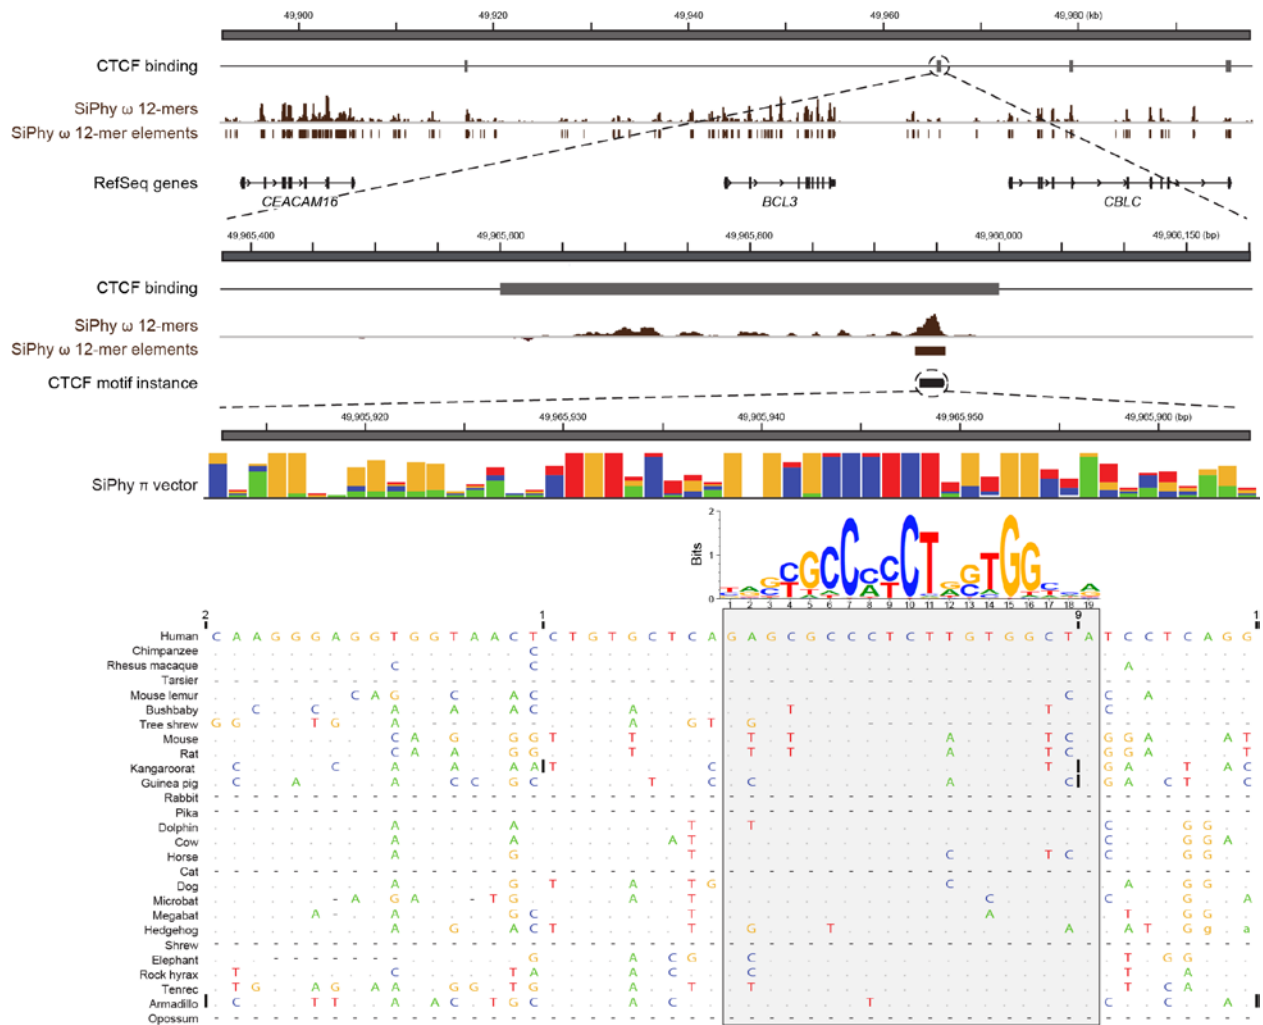

**Supplementary Figure S17 - Example of a constrained element with a region of CTCF binding between *BCL3* and *CBL3* in the human genome. SiPhy rate indicates the level of constraint in overlapping 12-mers. A close-up of the constrained element shows overlap with a predicted CTCF site.**



|                  |    | Chromatin mark frequencies (%) |          |          |          |         |         |         |         |        |     |                                           |                                               |                       |                                            |                       |                                       |                                  |  |  |
|------------------|----|--------------------------------|----------|----------|----------|---------|---------|---------|---------|--------|-----|-------------------------------------------|-----------------------------------------------|-----------------------|--------------------------------------------|-----------------------|---------------------------------------|----------------------------------|--|--|
|                  |    | CTCF                           | H3K27me3 | H3K36me3 | H4K20me1 | H3K4me1 | H3K4me2 | H3K4me3 | H3K27ac | H3K9ac | WCE | Percent of unexplained genome covered (%) | Percent of unexplained constraint covered (%) | Constraint enrichment | Cumulative % of unexplained genome covered | Cumulative enrichment | Chromatin state tentative annotations |                                  |  |  |
| Chromatin states | 1  | 16                             | 2        | 2        | 6        | 17      | 93      | 99      | 96      | 98     | 2   | 0.5                                       | 1.5                                           | 3.27                  | 1.5                                        | 3.27                  | 1                                     | Active promoter                  |  |  |
|                  | 3  | 13                             | 72       | 0        | 9        | 48      | 78      | 49      | 1       | 10     | 1   | 0.6                                       | 1.8                                           | 2.96                  | 3.3                                        | 3.10                  | 3                                     | Inactive/poised promoter         |  |  |
|                  | 6  | 7                              | 1        | 1        | 3        | 58      | 75      | 8       | 6       | 5      | 1   | 4.9                                       | 11.7                                          | 2.40                  | 14.9                                       | 2.53                  | 6                                     | Weak/poised enhancer             |  |  |
|                  | 4  | 11                             | 1        | 15       | 11       | 96      | 99      | 75      | 97      | 86     | 4   | 2.0                                       | 4.1                                           | 2.05                  | 19.0                                       | 2.41                  | 4                                     | Strong enhancer                  |  |  |
|                  | 2  | 12                             | 2        | 6        | 9        | 53      | 94      | 95      | 14      | 44     | 1   | 0.5                                       | 0.8                                           | 1.52                  | 19.7                                       | 2.36                  | 2                                     | Weak promoter                    |  |  |
|                  | 5  | 5                              | 0        | 10       | 3        | 88      | 57      | 5       | 84      | 25     | 1   | 3.5                                       | 5.0                                           | 1.44                  | 24.7                                       | 2.09                  | 5                                     | Strong enhancer                  |  |  |
|                  | 7  | 2                              | 1        | 2        | 1        | 56      | 3       | 0       | 6       | 2      | 1   | 7.5                                       | 9.8                                           | 1.32                  | 34.5                                       | 1.79                  | 7                                     | Weak/poised enhancer             |  |  |
|                  | 8  | 92                             | 2        | 1        | 3        | 6       | 3       | 0       | 0       | 1      | 1   | 1.1                                       | 1.4                                           | 1.23                  | 35.9                                       | 1.76                  | 8                                     | Insulator                        |  |  |
|                  | 12 | 1                              | 27       | 0        | 2        | 0       | 0       | 0       | 0       | 0      | 0   | 13.1                                      | 13.4                                          | 1.02                  | 49.3                                       | 1.47                  | 12                                    | Polycomb repressed               |  |  |
|                  | 9  | 5                              | 0        | 43       | 43       | 37      | 11      | 2       | 9       | 4      | 1   | 1.6                                       | 1.5                                           | 0.96                  | 50.8                                       | 1.45                  | 9                                     | Transcriptional transition       |  |  |
|                  | 11 | 0                              | 0        | 3        | 2        | 0       | 0       | 0       | 0       | 0      | 0   | 20.2                                      | 17.2                                          | 0.85                  | 68.0                                       | 1.23                  | 11                                    | Weak transcribed                 |  |  |
|                  | 10 | 1                              | 0        | 47       | 3        | 0       | 0       | 0       | 0       | 0      | 1   | 0.9                                       | 1.0                                           | 1.03                  | 69.0                                       | 1.23                  | 10                                    | Transcriptional elongation       |  |  |
|                  | 13 | 0                              | 0        | 0        | 0        | 0       | 0       | 0       | 0       | 0      | 0   | 43.6                                      | 31.0                                          | 0.71                  | 100.0                                      | 1.00                  | 13                                    | Heterochromatin; low signal      |  |  |
|                  | 14 | 22                             | 28       | 19       | 41       | 6       | 5       | 26      | 5       | 13     | 37  | 0.1                                       | 0.0                                           | 0.06                  | 100.0                                      | 1.00                  | 14                                    | Repetitive/copy number variation |  |  |
|                  | 15 | 85                             | 85       | 91       | 88       | 76      | 77      | 91      | 73      | 85     | 78  | 0.0                                       | 0.0                                           | 0.06                  | 100.0                                      | 1.00                  | 15                                    | Repetitive/copy number variation |  |  |

**Supplementary Figure S19 - Overlap of constraint bases with chromatin states.** As much as 36% of unexplained constrained bases overlap chromatin states associated with candidate promoter, enhancer, or insulator states in at least one cell type among nine diverse cell lines. Reported enrichments were calculated after first excluding locations assigned to a higher listed state in one or more cell types.



Cumulative % of "unexplained" constrained bases covered

| Chromatin State Tentative Annotations | state | 9      | 8      | 7      | 6      | 5      | 4      | 3      | 2      | 1      | 0      |
|---------------------------------------|-------|--------|--------|--------|--------|--------|--------|--------|--------|--------|--------|
| Active promoter                       | 1     | 0.05   | 0.09   | 0.14   | 0.19   | 0.25   | 0.32   | 0.45   | 0.66   | 1.51   | 100.00 |
| Inactive/poised promoter              | 3     | 0.06   | 0.12   | 0.21   | 0.32   | 0.46   | 0.64   | 0.89   | 1.35   | 3.27   | 100.00 |
| Weak/poised enhancer                  | 6     | 0.06   | 0.13   | 0.24   | 0.41   | 0.67   | 1.15   | 2.17   | 4.92   | 14.92  | 100.00 |
| Strong enhancer                       | 4     | 0.12   | 0.27   | 0.52   | 0.91   | 1.53   | 2.55   | 4.32   | 8.06   | 18.98  | 100.00 |
| Weak promoter                         | 2     | 0.47   | 0.80   | 1.13   | 1.58   | 2.23   | 3.22   | 4.99   | 8.75   | 19.73  | 100.00 |
| Strong enhancer                       | 5     | 0.55   | 0.98   | 1.50   | 2.30   | 3.55   | 5.23   | 7.83   | 12.74  | 24.72  | 100.00 |
| Weak/poised enhancer                  | 7     | 0.67   | 1.28   | 2.15   | 3.44   | 5.40   | 8.03   | 11.89  | 18.82  | 34.54  | 100.00 |
| Insulator                             | 8     | 1.14   | 1.94   | 2.94   | 4.34   | 6.40   | 9.14   | 13.12  | 20.15  | 35.92  | 100.00 |
| Polycomb repressed                    | 12    | 1.74   | 3.27   | 5.12   | 7.55   | 10.94  | 15.48  | 21.76  | 31.48  | 49.29  | 100.00 |
| Transcriptional transition            | 9     | 2.06   | 3.78   | 5.81   | 8.42   | 11.96  | 16.65  | 23.09  | 32.96  | 50.82  | 100.00 |
| Weak transcribed                      | 11    | 4.19   | 8.22   | 12.73  | 17.99  | 24.20  | 31.33  | 40.01  | 51.22  | 68.05  | 100.00 |
| Transcriptional elongation            | 10    | 9.51   | 14.10  | 18.38  | 23.06  | 28.49  | 34.89  | 42.71  | 53.06  | 69.02  | 100.00 |
| Heterochromatin; low signal           | 13    | 99.58  | 99.93  | 99.96  | 99.97  | 99.97  | 99.98  | 99.99  | 99.99  | 99.99  | 100.00 |
| Repetitive/copy number variation      | 14    | 99.92  | 99.97  | 99.98  | 99.98  | 99.99  | 99.99  | 99.99  | 100.00 | 100.00 | 100.00 |
| Repetitive/copy number variation      | 15    | 100.00 | 100.00 | 100.00 | 100.00 | 100.00 | 100.00 | 100.00 | 100.00 | 100.00 | 100.00 |

Cumulative % of "unexplained" genome bases covered

| Chromatin State Tentative Annotations | state | 9      | 8      | 7      | 6      | 5      | 4      | 3      | 2      | 1      | 0      |
|---------------------------------------|-------|--------|--------|--------|--------|--------|--------|--------|--------|--------|--------|
| Active promoter                       | 1     | 0.01   | 0.02   | 0.03   | 0.04   | 0.05   | 0.07   | 0.10   | 0.15   | 0.46   | 100.00 |
| Inactive/poised promoter              | 3     | 0.01   | 0.02   | 0.04   | 0.07   | 0.09   | 0.14   | 0.20   | 0.33   | 1.06   | 100.00 |
| Weak/poised enhancer                  | 6     | 0.01   | 0.03   | 0.05   | 0.09   | 0.17   | 0.30   | 0.61   | 1.54   | 5.91   | 100.00 |
| Strong enhancer                       | 4     | 0.02   | 0.06   | 0.11   | 0.21   | 0.37   | 0.65   | 1.20   | 2.57   | 7.88   | 100.00 |
| Weak promoter                         | 2     | 0.13   | 0.22   | 0.31   | 0.43   | 0.60   | 0.88   | 1.46   | 2.89   | 8.38   | 100.00 |
| Strong enhancer                       | 5     | 0.15   | 0.26   | 0.41   | 0.64   | 1.03   | 1.61   | 2.65   | 4.93   | 11.85  | 100.00 |
| Weak/poised enhancer                  | 7     | 0.18   | 0.36   | 0.63   | 1.08   | 1.84   | 2.97   | 4.88   | 8.81   | 19.31  | 100.00 |
| Insulator                             | 8     | 0.38   | 0.65   | 1.00   | 1.52   | 2.36   | 3.58   | 5.60   | 9.68   | 20.44  | 100.00 |
| Polycomb repressed                    | 12    | 0.55   | 1.06   | 1.79   | 2.94   | 4.74   | 7.45   | 11.68  | 18.86  | 33.51  | 100.00 |
| Transcriptional transition            | 9     | 0.68   | 1.31   | 2.17   | 3.45   | 5.41   | 8.31   | 12.76  | 20.23  | 35.11  | 100.00 |
| Weak transcribed                      | 11    | 2.55   | 5.46   | 8.99   | 13.19  | 18.16  | 24.00  | 31.18  | 40.54  | 55.34  | 100.00 |
| Transcriptional elongation            | 10    | 8.18   | 11.61  | 14.78  | 18.27  | 22.42  | 27.43  | 33.76  | 42.31  | 56.28  | 100.00 |
| Heterochromatin; low signal           | 13    | 99.31  | 99.70  | 99.75  | 99.78  | 99.79  | 99.81  | 99.83  | 99.86  | 99.88  | 100.00 |
| Repetitive/copy number variation      | 14    | 99.80  | 99.87  | 99.89  | 99.90  | 99.91  | 99.92  | 99.93  | 99.95  | 99.96  | 100.00 |
| Repetitive/copy number variation      | 15    | 100.00 | 100.00 | 100.00 | 100.00 | 100.00 | 100.00 | 100.00 | 100.00 | 100.00 | 100.00 |

Cumulative enrichments in "unexplained" constrained elements

| Chromatin State Tentative Annotations | state | 9    | 8    | 7    | 6    | 5    | 4    | 3    | 2    | 1    | 0    |
|---------------------------------------|-------|------|------|------|------|------|------|------|------|------|------|
| Active promoter                       | 1     | 5.42 | 5.02 | 5.00 | 4.92 | 4.79 | 4.62 | 4.59 | 4.31 | 3.27 | 1.00 |
| Inactive/poised promoter              | 3     | 5.59 | 5.04 | 5.00 | 4.93 | 4.84 | 4.70 | 4.49 | 4.13 | 3.10 | 1.00 |
| Weak/poised enhancer                  | 6     | 5.51 | 4.92 | 4.73 | 4.46 | 4.07 | 3.79 | 3.53 | 3.20 | 2.53 | 1.00 |
| Strong enhancer                       | 4     | 5.02 | 4.68 | 4.53 | 4.35 | 4.12 | 3.89 | 3.59 | 3.14 | 2.41 | 1.00 |
| Weak promoter                         | 2     | 3.60 | 3.63 | 3.65 | 3.69 | 3.71 | 3.65 | 3.42 | 3.03 | 2.36 | 1.00 |
| Strong enhancer                       | 5     | 3.70 | 3.71 | 3.68 | 3.61 | 3.44 | 3.24 | 2.96 | 2.59 | 2.09 | 1.00 |
| Weak/poised enhancer                  | 7     | 3.73 | 3.60 | 3.42 | 3.18 | 2.93 | 2.71 | 2.44 | 2.14 | 1.79 | 1.00 |
| Insulator                             | 8     | 2.97 | 2.98 | 2.94 | 2.85 | 2.71 | 2.56 | 2.34 | 2.08 | 1.76 | 1.00 |
| Polycomb repressed                    | 12    | 3.18 | 3.09 | 2.85 | 2.57 | 2.31 | 2.08 | 1.86 | 1.67 | 1.47 | 1.00 |
| Transcriptional transition            | 9     | 3.01 | 2.89 | 2.68 | 2.44 | 2.21 | 2.00 | 1.81 | 1.63 | 1.45 | 1.00 |
| Weak transcribed                      | 11    | 1.64 | 1.50 | 1.42 | 1.36 | 1.33 | 1.31 | 1.28 | 1.26 | 1.23 | 1.00 |
| Transcriptional elongation            | 10    | 1.16 | 1.21 | 1.24 | 1.26 | 1.27 | 1.27 | 1.27 | 1.25 | 1.23 | 1.00 |
| Heterochromatin; low signal           | 13    | 1.00 | 1.00 | 1.00 | 1.00 | 1.00 | 1.00 | 1.00 | 1.00 | 1.00 | 1.00 |
| Repetitive/copy number variation      | 14    | 1.00 | 1.00 | 1.00 | 1.00 | 1.00 | 1.00 | 1.00 | 1.00 | 1.00 | 1.00 |
| Repetitive/copy number variation      | 15    | 1.00 | 1.00 | 1.00 | 1.00 | 1.00 | 1.00 | 1.00 | 1.00 | 1.00 | 1.00 |

**Supplementary Figure S20 - Chromatin state conservation analysis for varying numbers of cell types.** The top grid indicates the cumulative total % of constrained bases in the unmasked, that is 'unexplained' portion of the genome, assigned to the state of the row or a higher listed state in that number of cell types of the column or more. The middle table is similar, but for all bases in the 'unexplained' portion of the genome. The last table gives the enrichment for constrained bases, that is the ratio of the values in the first table to the second table.

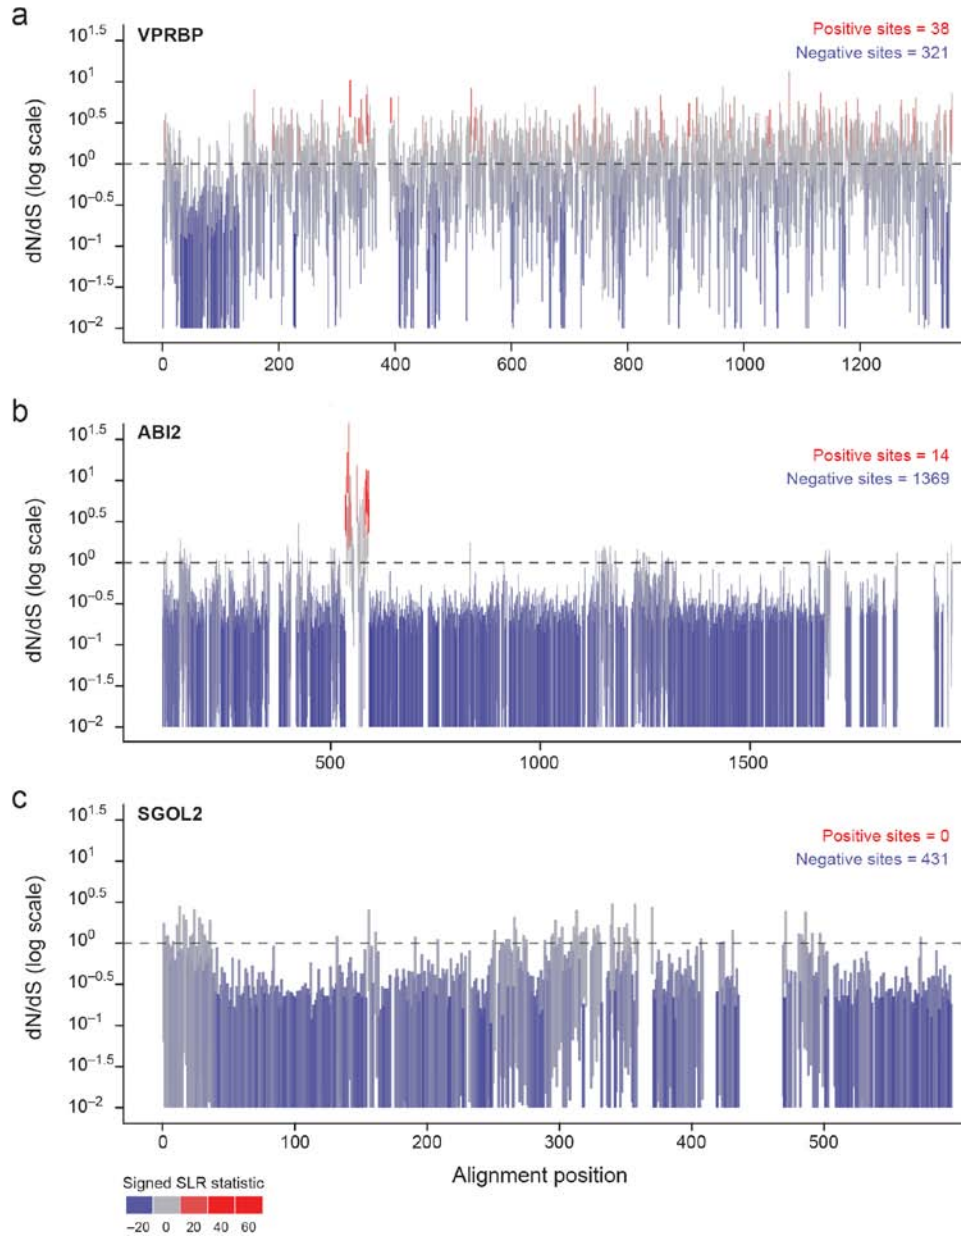

**Supplementary Figure S21 - Positive selection acts uniformly for some genes and in a site-specific fashion for other genes.** **a**, *VPRBP* shows a mixture of negative (purifying) and positive selection along its length, **b**, *ABI2* shows strong purifying selection with negatively-selected sites over most of the sequence and a localized region of positively-selected sites, **c**, *SGOL2* shows only purifying selection with negatively-selected sites over the entire gene. Each vertical bar covers the estimated 95% confidence interval for  $dN/dS$  at that site (with values of 0 truncated to 0.01 to accommodate the log scaling), and bars are colored according to a signed version of the SLR statistic for non-neutral evolution: blue for sites under negative selection, gray for sites under neutral evolution, and red for sites under positive selection. A dotted line is shown at neutral evolution ( $dN/dS=1$ ) for reference, and the number of statistically significant sites under positive and negative selection ( $FDR < 5\%$ ) is shown for each gene.

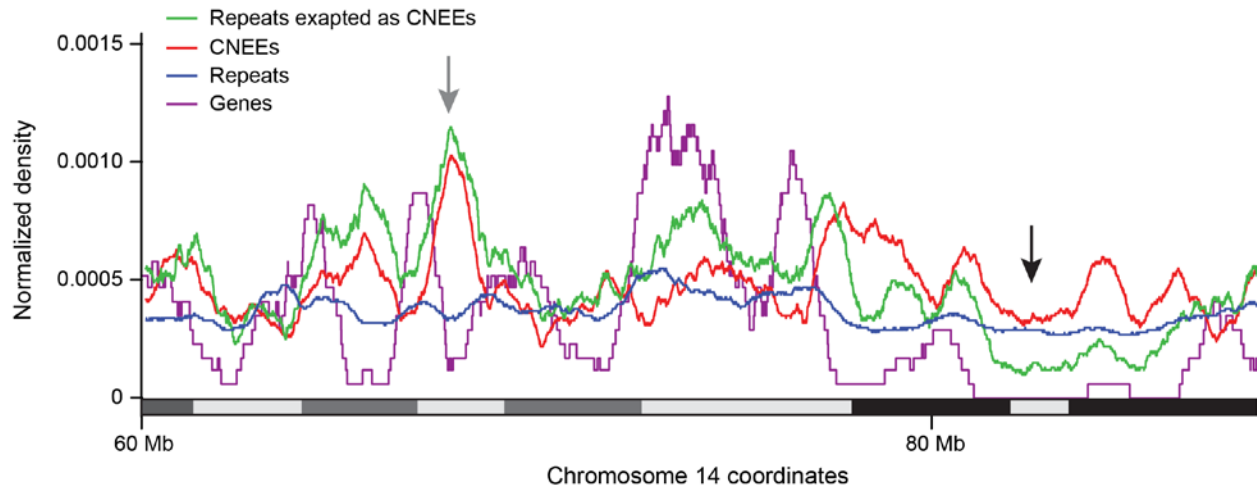

**Supplementary Figure S22 - Exaptation of non-coding constrained elements is overrepresented near developmental genes and depleted in the middle of large gene deserts.** Repeats exapted as CNEEs follow the density of all CNEEs, and not that of the repeat elements (grey arrow). The normalized density of CNEEs exapted from repeat elements (green) is shown compared to protein coding genes (purple), CNEEs (red), and repeats (blue). Densities are calculated as the number of elements within a 1 Mb window divided by the total number of elements in the genome. The trends in this section of chromosome 14 are representative of the genome as a whole. CNEEs exapted from repeats tend to be depleted in gene deserts larger than 1 Mb (black arrow).

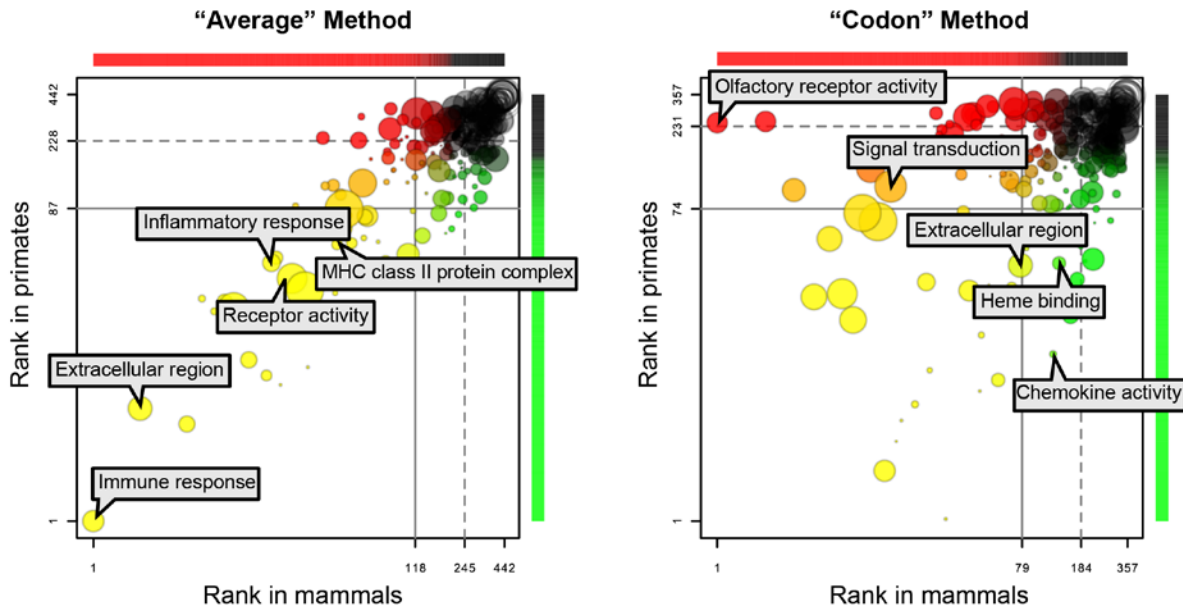

**Supplementary Figure S23 - GO enrichments for positively selected genes in primates versus mammals.** GO term enrichments were calculated using the distributed positive selection (left) and localized positive selection (right) methods (see Methods). Each bubble represents one GO term, and its size is proportional to the log of the number of times the term was annotated in the gene “universe” (17,709 genes). Colors represent unadjusted p-values for enrichment in primates (red), mammals (green), both (yellow), or neither (black). The horizontal and vertical positions of the bubble correspond to the term’s rank in mammals or primates, respectively, plotted on a log scale. Lines on each axis indicate ranks corresponding to  $p=0.05$  (solid) and  $p=0.5$  (dashed). Using the distributed positive selection method, statistical significance of enrichment is highly correlated in primates and mammals, suggesting that similar genes and pathways are under overall selection. In contrast, the localized positive selection method shows greater discordance between primates and mammals, indicating that different sets of genes show signals of selection at the single codon level in the two clades.

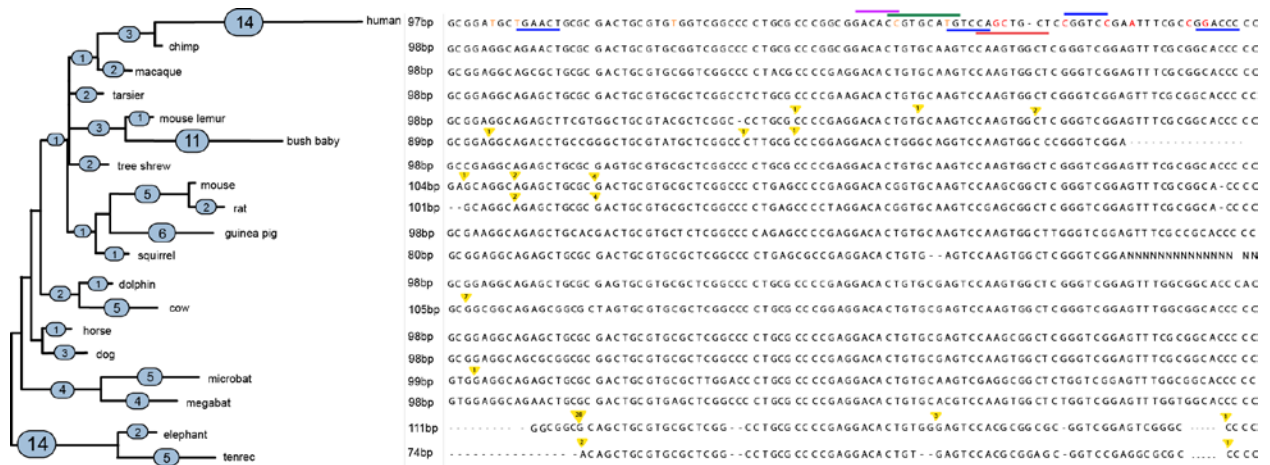

**Supplemental Figure S24 - Rapid human evolution in the 5' UTR of FGF13.** 2xHAR1 is a conserved non-coding element in the 5' UTR of the shortest FGF13 isoform that has evolved rapidly in humans since divergence from chimpanzee. Human-specific substitutions in 2xHAR1 could potentially have altered isoform-specific transcription. *Left:* Unrooted mammalian phylogeny for 2xHAR1 with branch lengths proportional to the expected number of substitutions on each lineage, annotated in a bubble on each branch. *Center:* Length of the 2xHAR1 sequence for each species. *Right:* Multiple sequence alignment. Species with very few aligned bases are omitted. Insertions in non-human species are shown as yellow triangles with the number of inserted bases annotated. Human-specific substitutions\* are marked in red (fixed differences) or orange (polymorphic substitutions). The five polymorphic sites suggest that the function of 2xHAR1 may still be in the process of diverging from its ancestral state and are potential candidates for BFLS (Borjeson-Forssman-Lehmann syndrome) and other disease associations in humans. Predicted transcription factor binding site turnover events are marked with lines above (losses) or below (gains) the human sequence, with line color denoting the JASPAR family: blue= nuclear receptor, green= bZIP cEBP-like, red= bHLH(zip), purple= HMG. Note that the number of red and orange bases (12) does not match the expected number of substitutions (14), because of insertions and deletions in the alignment that are not displayed.
